# Supplementary material
Source: PubMed Central journal article supplement (PMC6057522)

# Supplementary Figures

## Contents

- 1) QQ plots for the cell-adjusted models [Pages 2-5]
- 2) Forest plots for the cell-adjusted continuous BMI model (top 86 sites) [Pages 6-21]
- 3) Leave-one-out analyses for the cell-adjusted continuous BMI model (top 86 sites) [Pages 22-37]
- 4) Density plots of the top 86 sites for
  - a) ALSPAC data [Pages 38-44]
  - b) GOYA data [Pages 45-51]

QQ-plots for cell-adjusted continuous BMI model

Fixed-effects meta-analysis - Lambda = -2.409

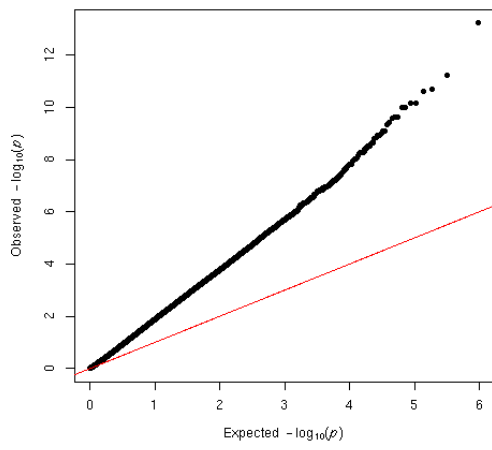

ALSPAC Lambda = 1.179

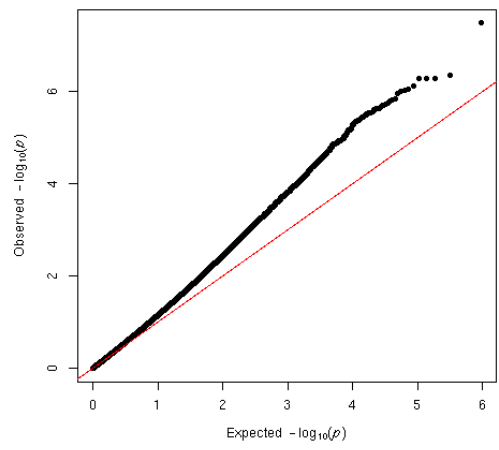

CBC\_hispanic Lambda = 0.926

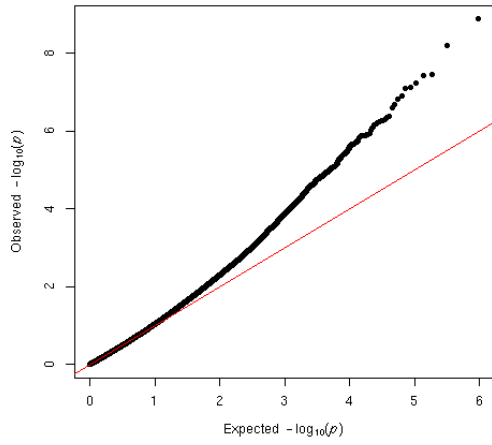

CBC\_white Lambda = 1.162

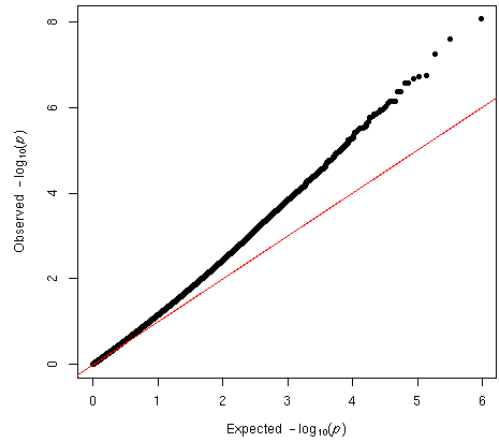

CHAMACOS Lambda = 0.834

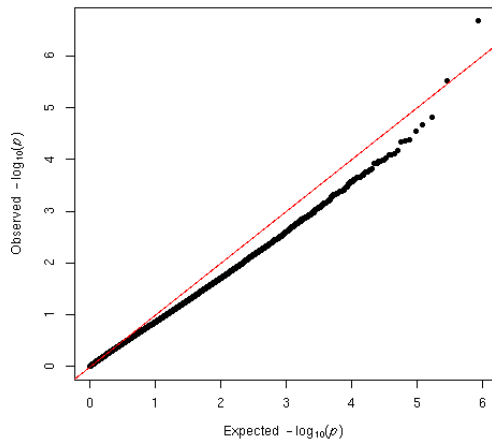

EARLI Lambda = 0.923

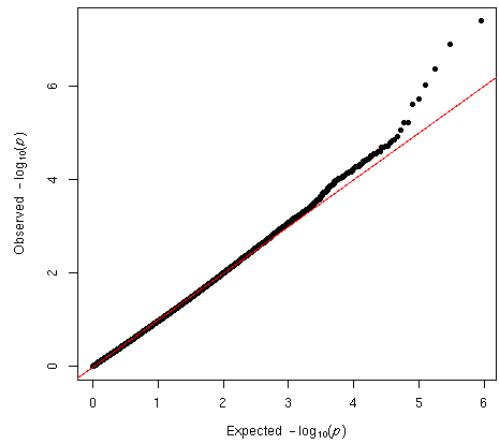

GECKO Lambda = 1.153

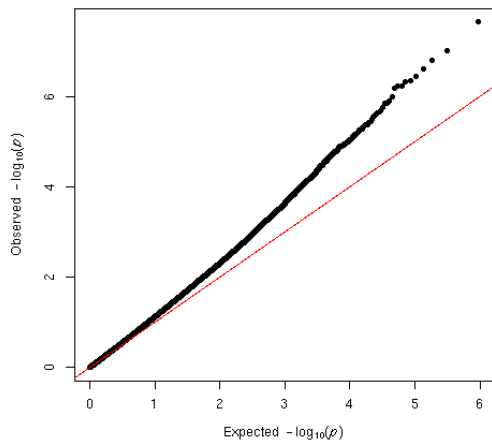

GEN3G Lambda = 1.039

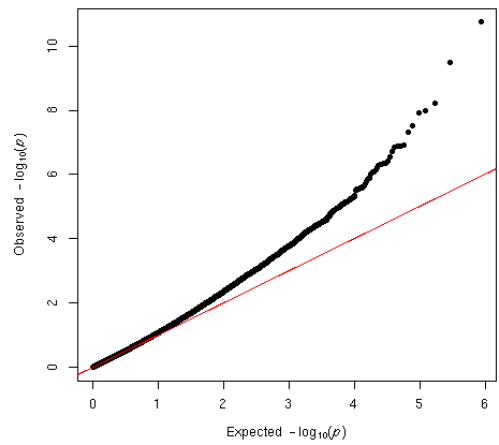

**GENR Lambda = 1.996**

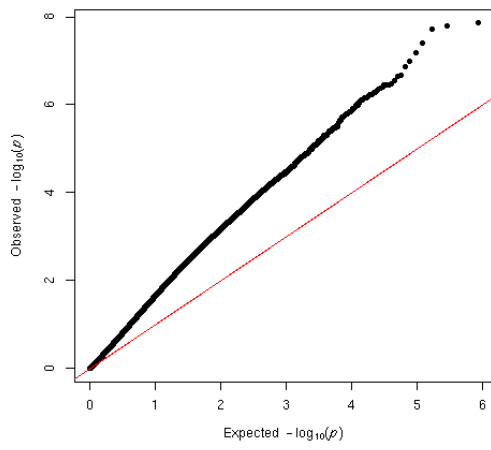

**GOYArandom Lambda = 1.01**

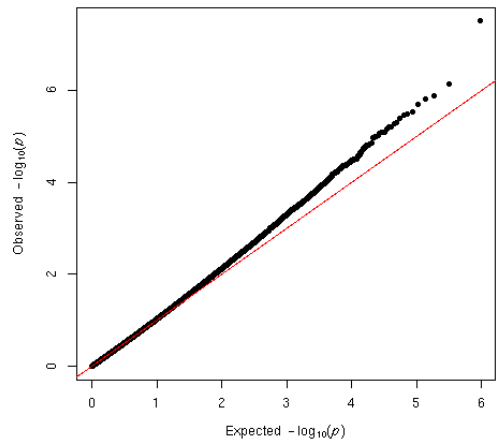

**IOW Lambda = 1.05**

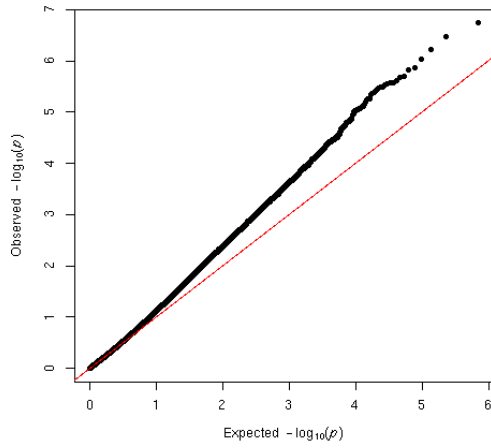

**MEDALL Lambda = 0.917**

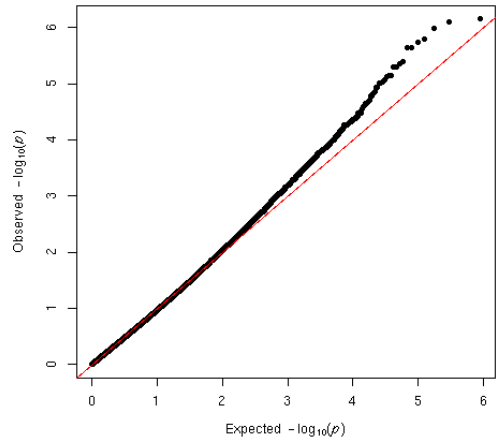

**MOBA1 Lambda = 2.739**

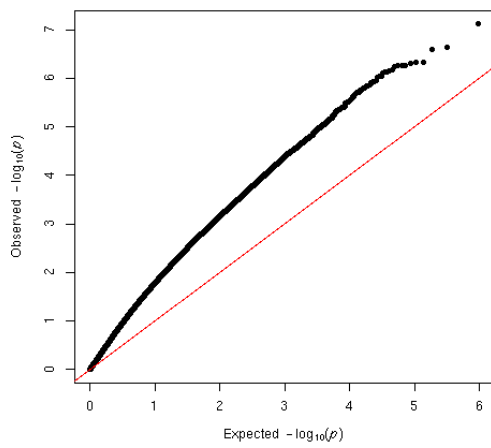

**MOBA2 Lambda = 2.763**

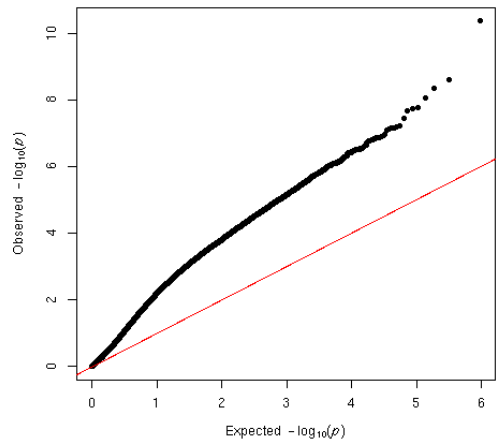

**MOBA3 Lambda = 0.759**

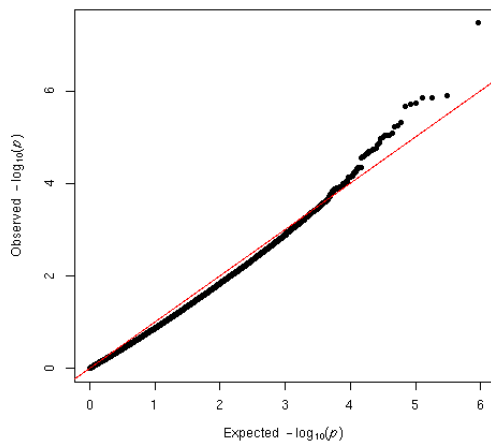

**NCL Lambda = 0.985**

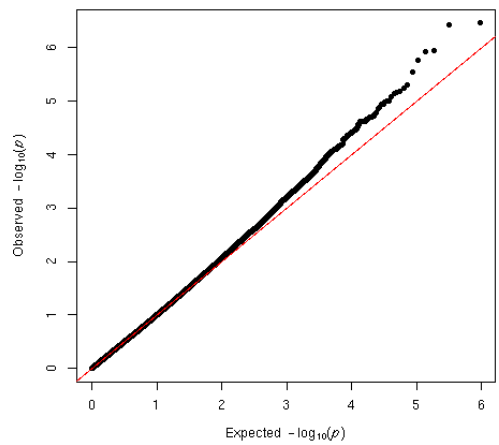

NEST Lambda = 0.929

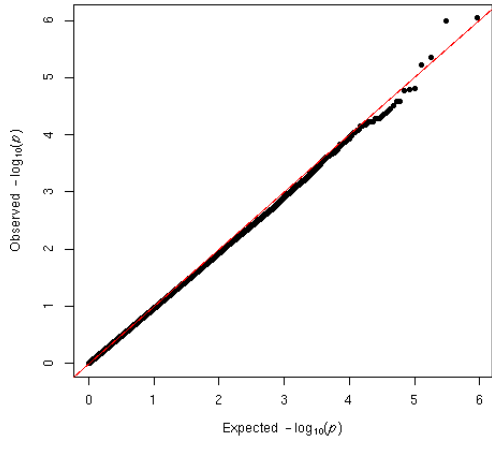

NHBCS Lambda = 1.167

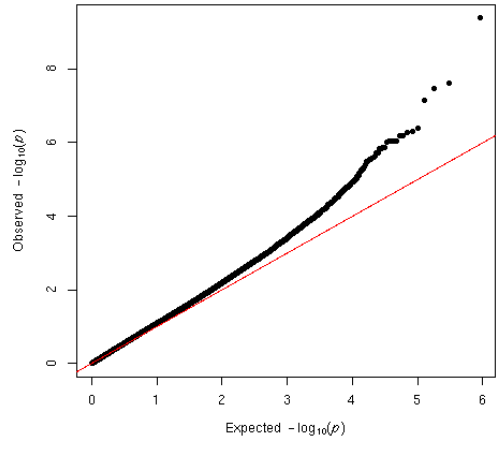

RICHS Lambda = 2.974

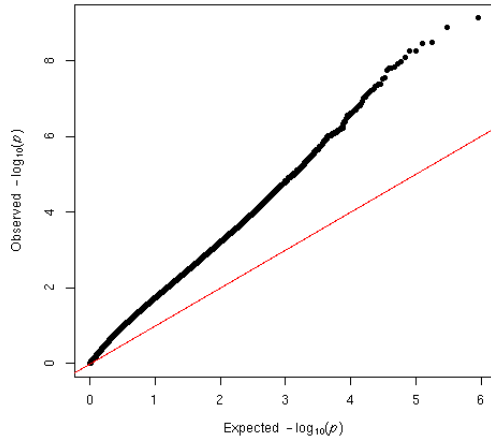

VIVA Lambda = 1.49

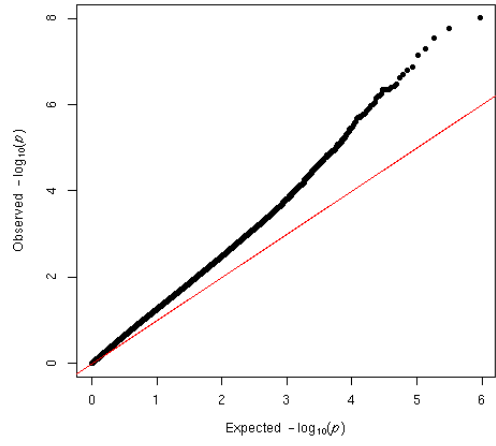

Forest plots for the cell-adjusted continuous BMI model

**Forest plot for probe:  
cg12009398 [VIPR2]**

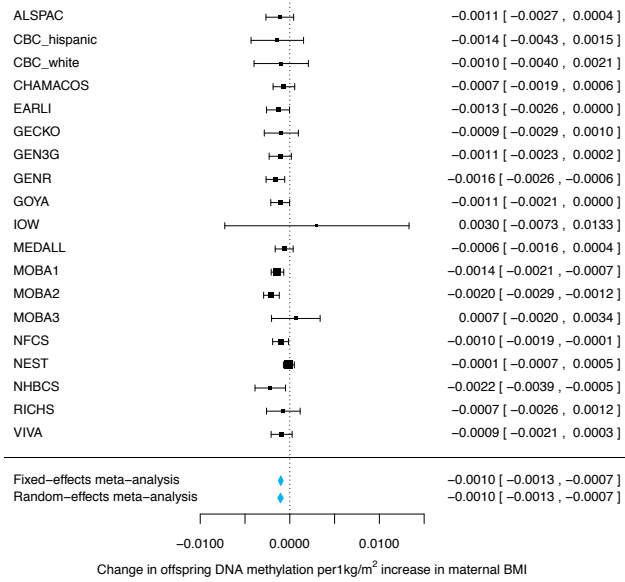

**Forest plot for probe:  
cg09285795 [AK055145]**

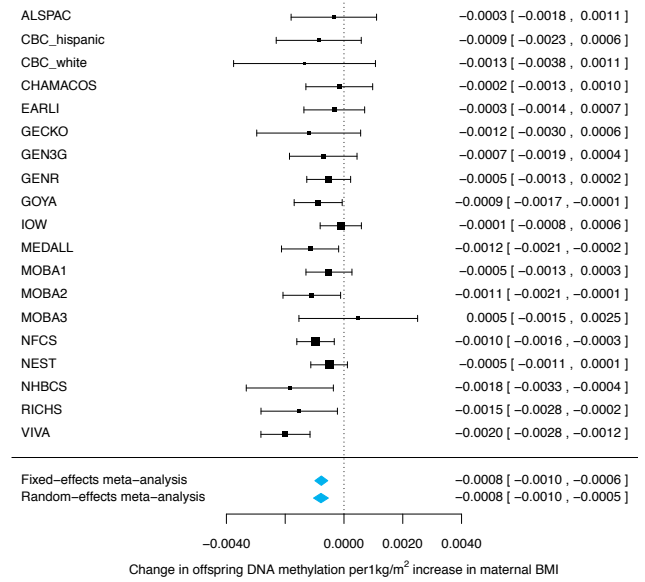

**Forest plot for probe:  
cg23080818 [RBMS1]**

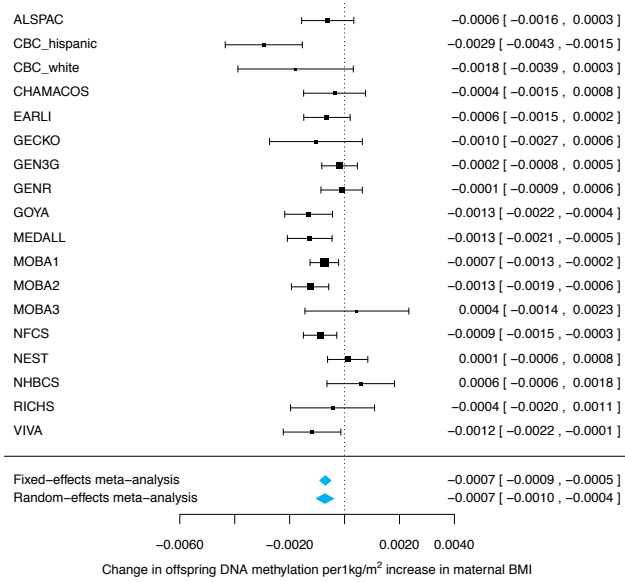

**Forest plot for probe:  
cg25213362 [TMPRSS12]**

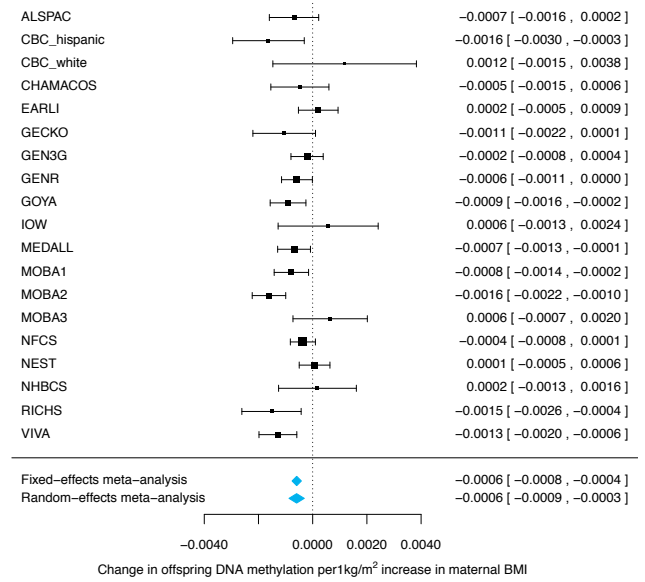

**Forest plot for probe:  
cg17782974 [TRIM8]**

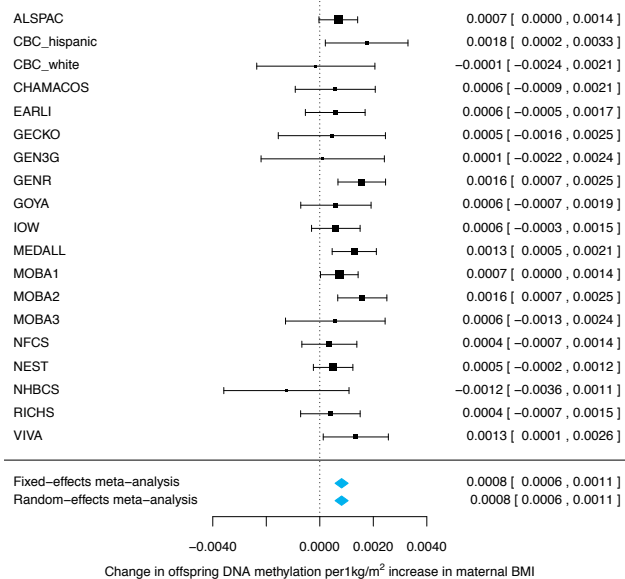

**Forest plot for probe:  
cg05086444 [VIPR2]**

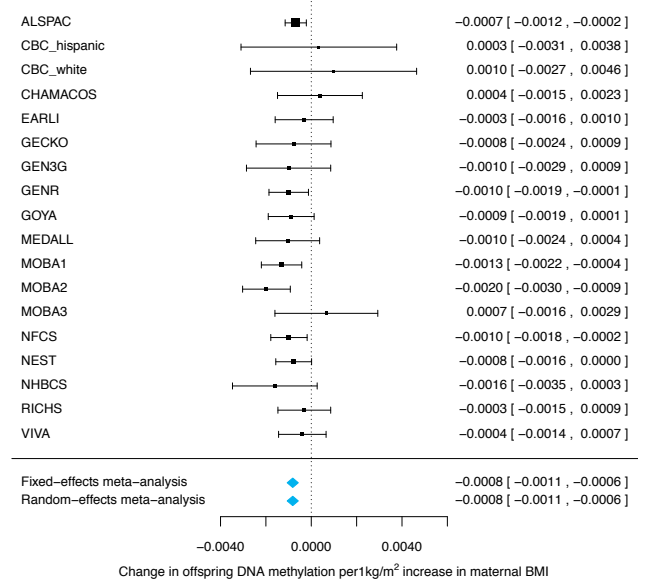

**Forest plot for probe:  
cg03258665 [EPHA2]**

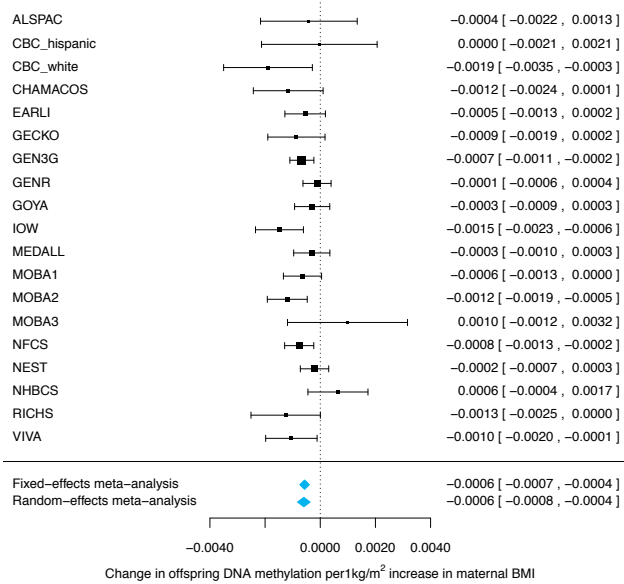

**Forest plot for probe:  
cg20065216 [DUSP16]**

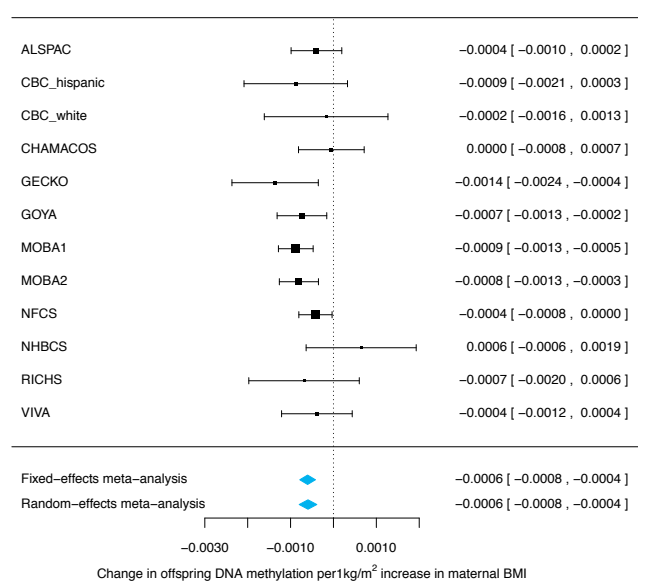

**Forest plot for probe:  
cg26434090 [DSCAML1]**

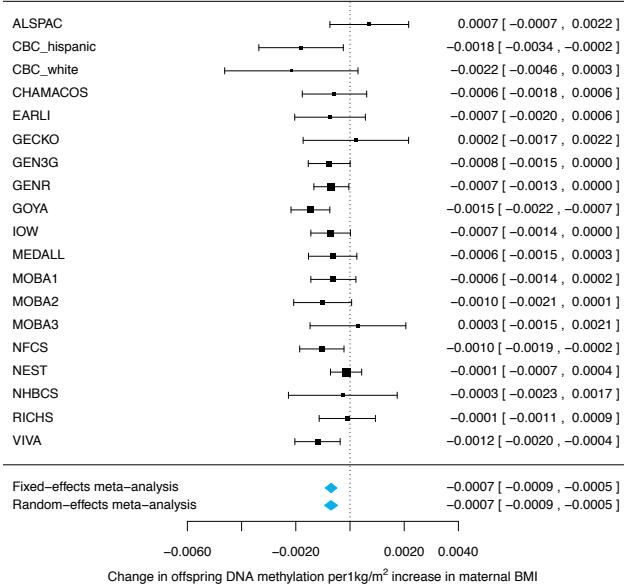

**Forest plot for probe:  
cg18268562 [FOXR1]**

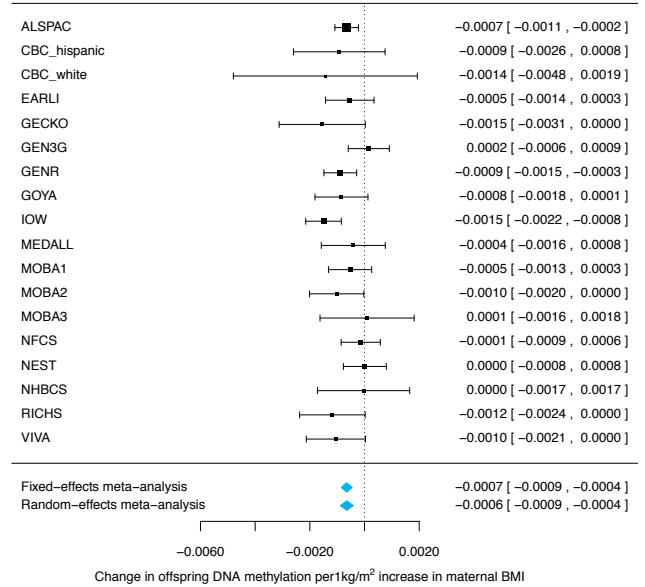

**Forest plot for probe:  
cg00285394 [SQLE]**

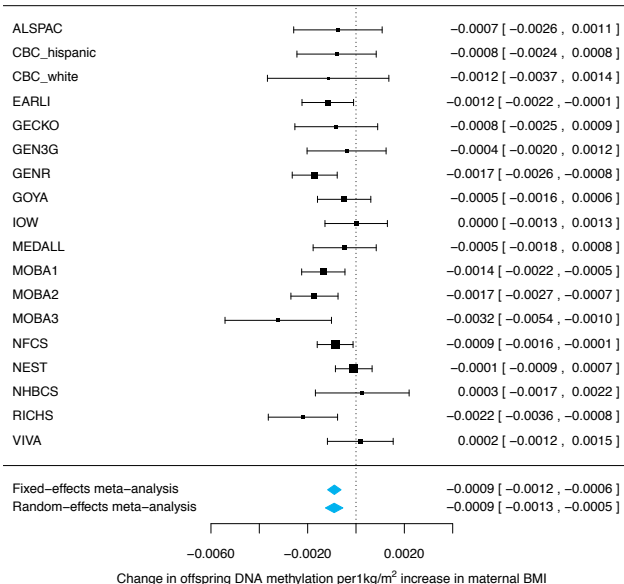

**Forest plot for probe:  
cg27179375 [POM121L1P]**

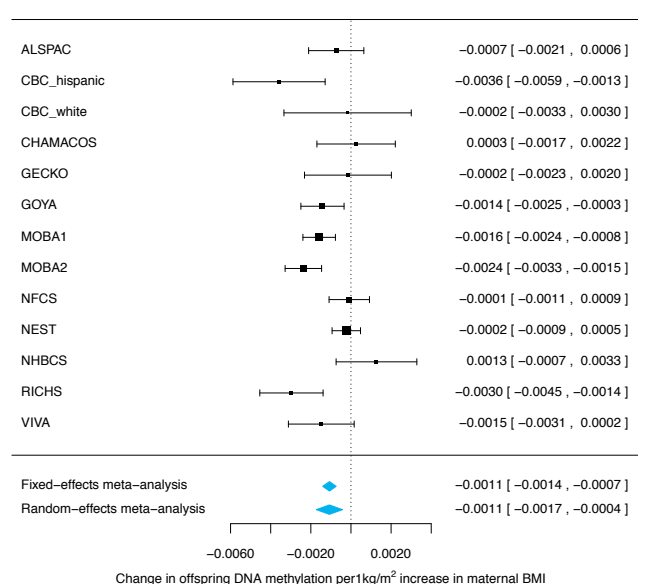



**Forest plot for probe:  
cg05586134 [PTCRA]**

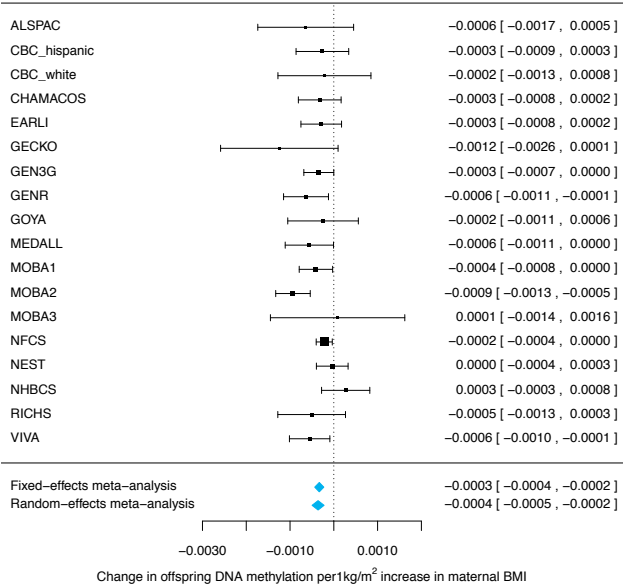

**Forest plot for probe:  
cg07357021 [PRICKLE2]**

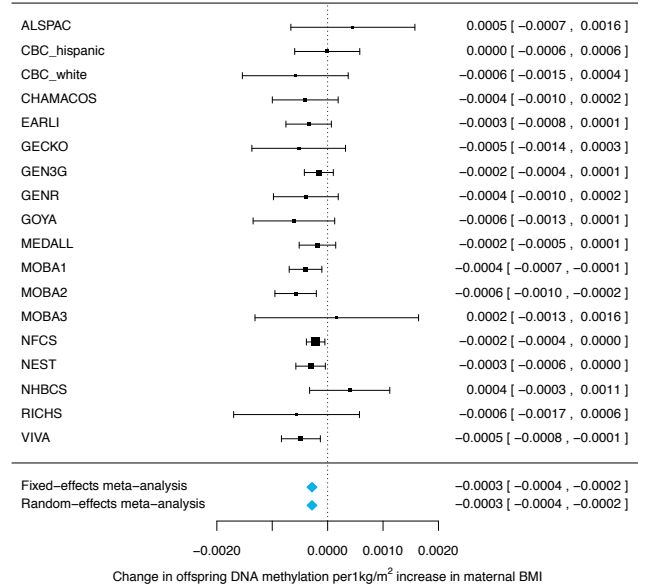

**Forest plot for probe:  
cg21778193 [MIR200B]**

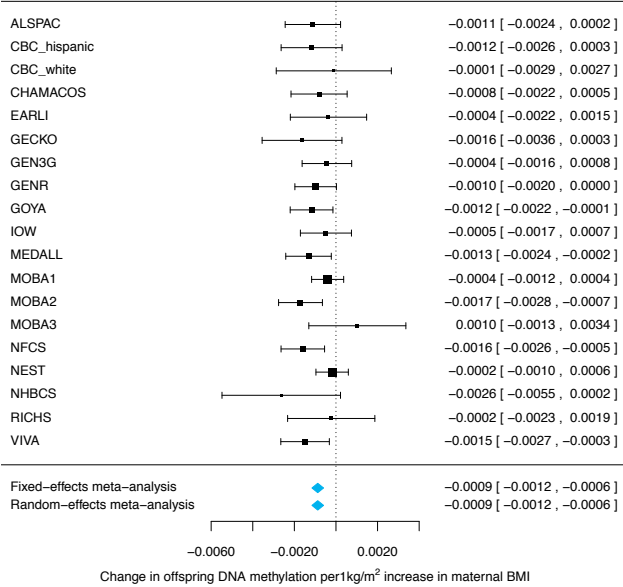

**Forest plot for probe:  
cg04836151 [LY6H]**

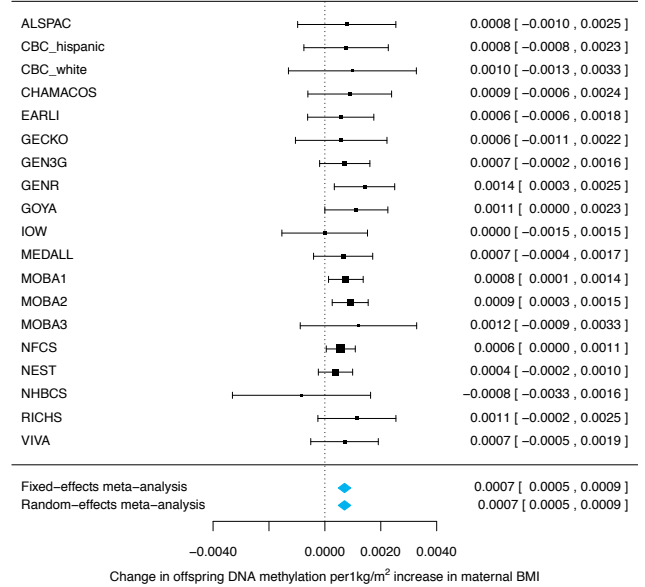

**Forest plot for probe:  
cg09243648 [BC031827]**

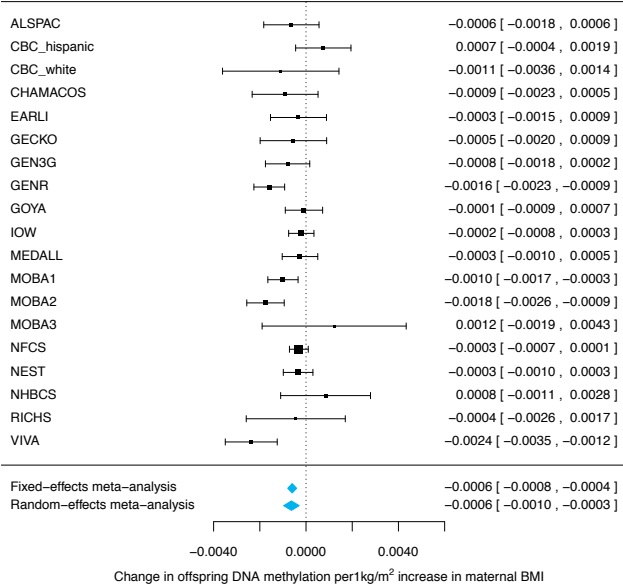

**Forest plot for probe:  
cg07822775 [PCSK6]**

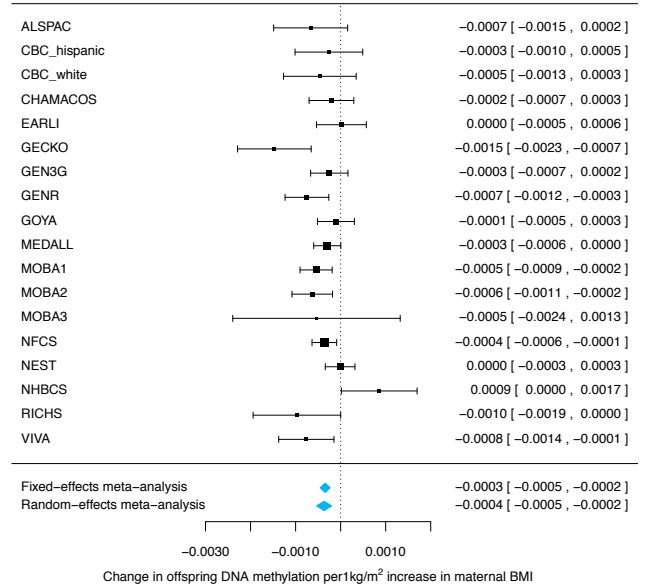

**Forest plot for probe:  
cg14906690 [KAT6B]**

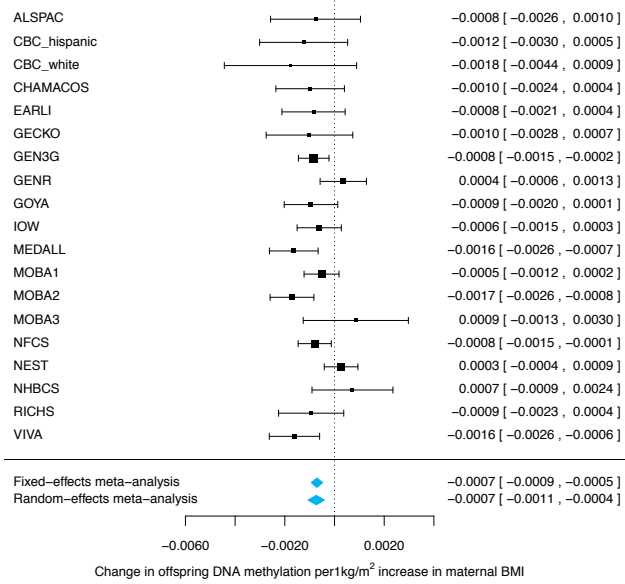

**Forest plot for probe:  
cg05309280 [GORASP2]**

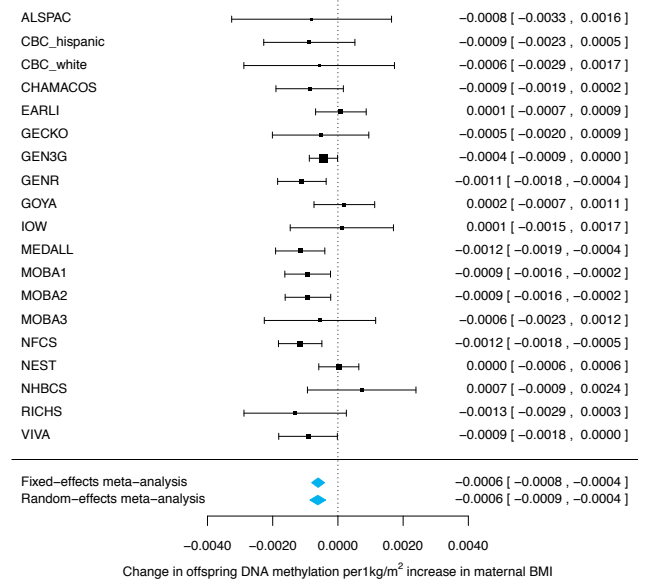

**Forest plot for probe:  
cg10635092 [ZFYVE28]**

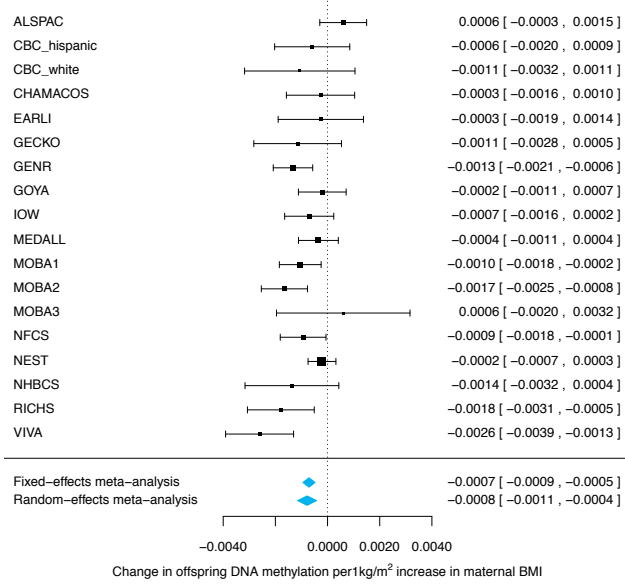

**Forest plot for probe:  
cg13403462 [ACTL10]**

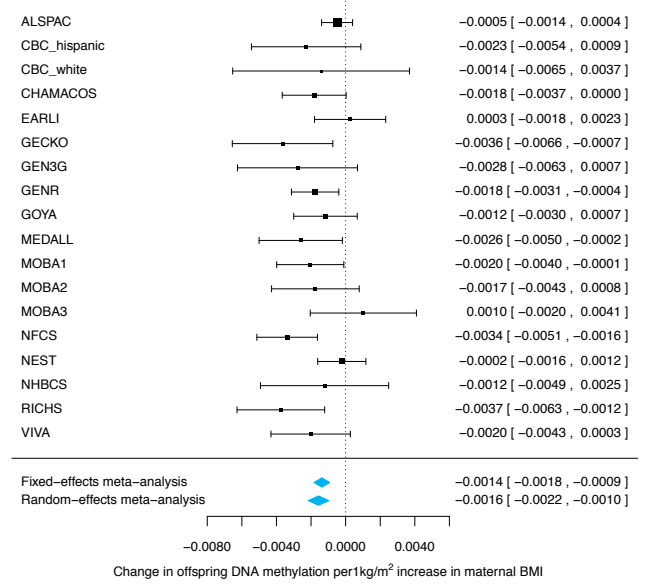

**Forest plot for probe:  
cg10187674 [ABCA5]**

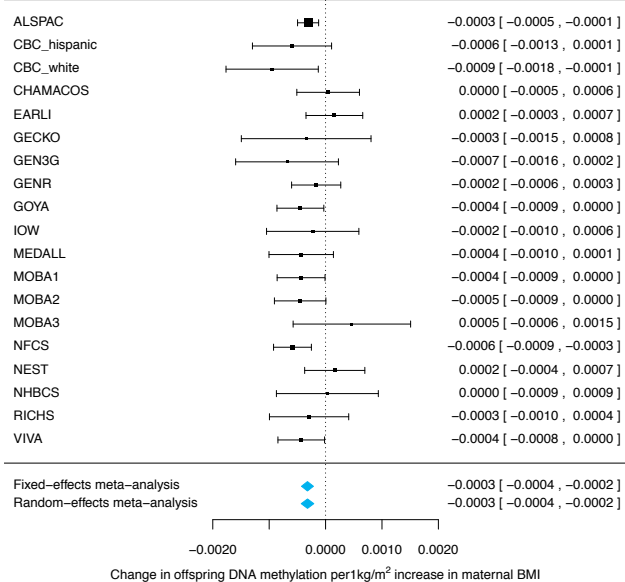

**Forest plot for probe:  
cg19762797 [XXYL1]**

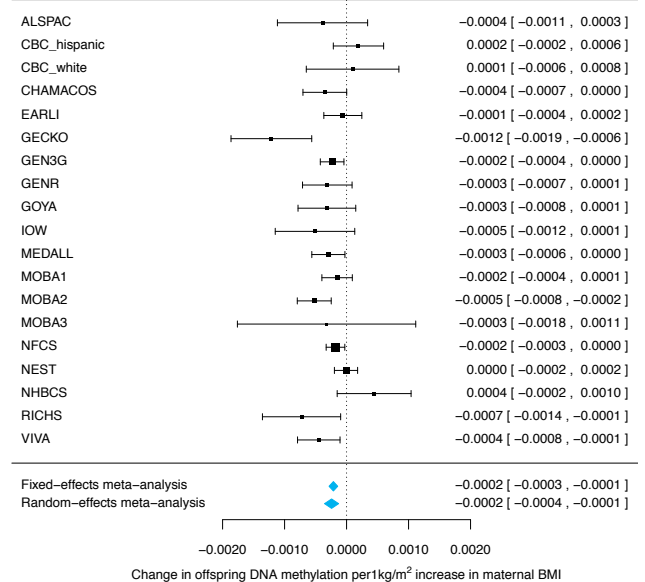

**Forest plot for probe:  
cg09230763 [MAP3K6]**

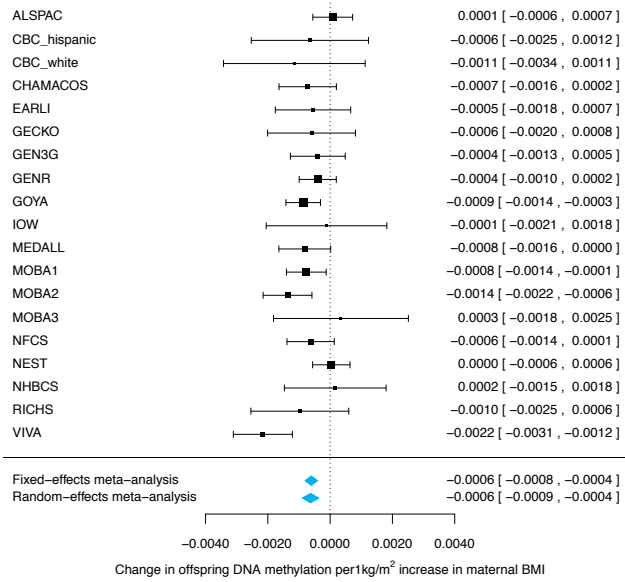

**Forest plot for probe:  
cg18156417 [MAP2K2]**

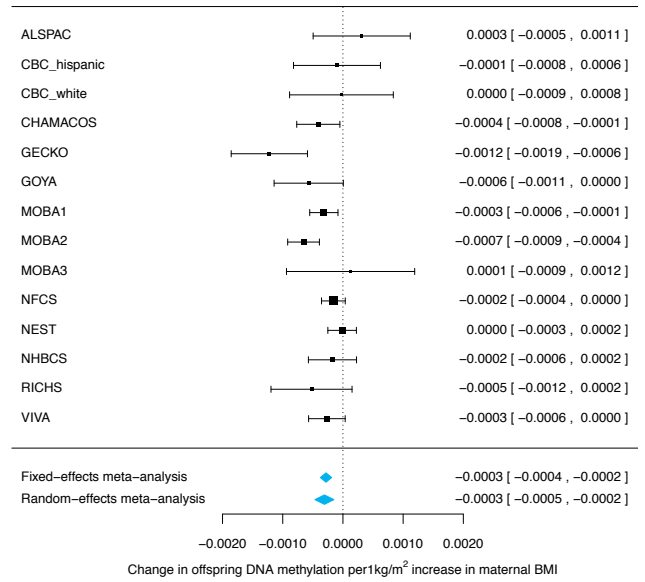

**Forest plot for probe:  
cg26220185 [AK127048]**

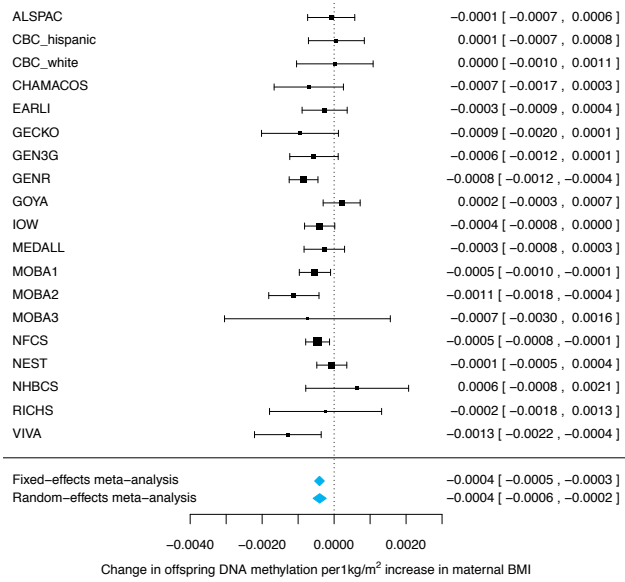

**Forest plot for probe:  
cg13540311 [SEPT9]**

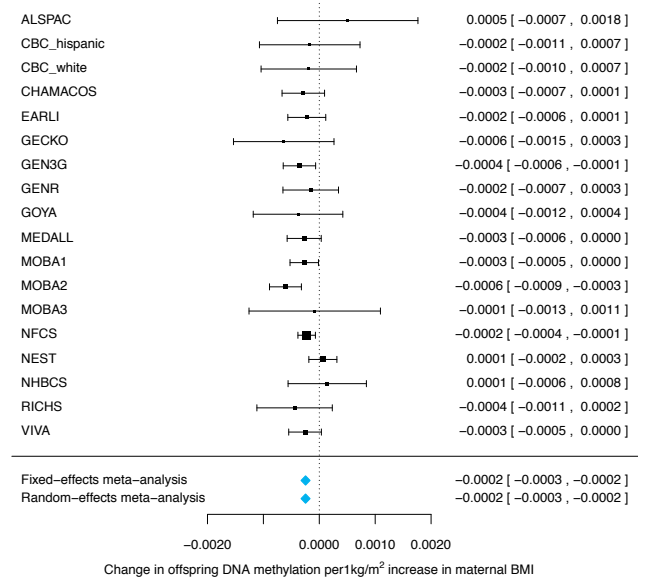

**Forest plot for probe:  
cg16877087 [RBMS1]**

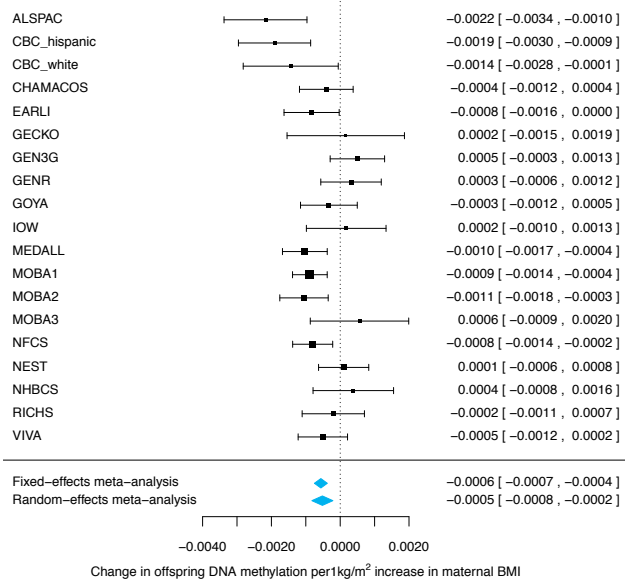

**Forest plot for probe:  
cg20594982 [AGRN]**

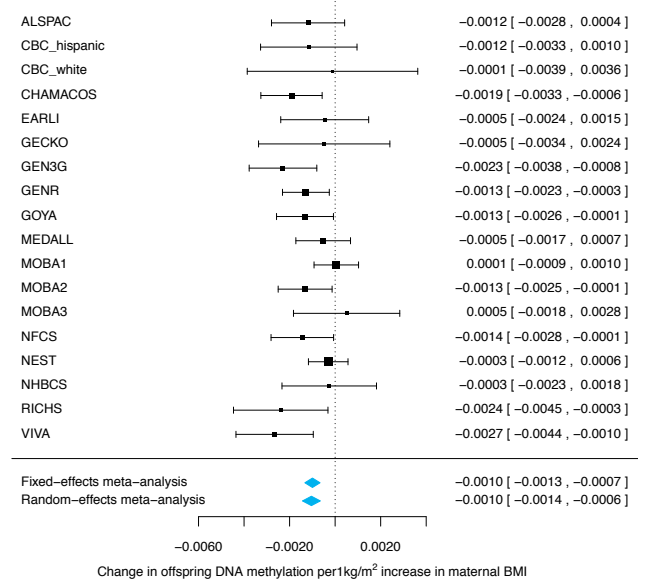

**Forest plot for probe:  
cg14660676 [SQLE]**

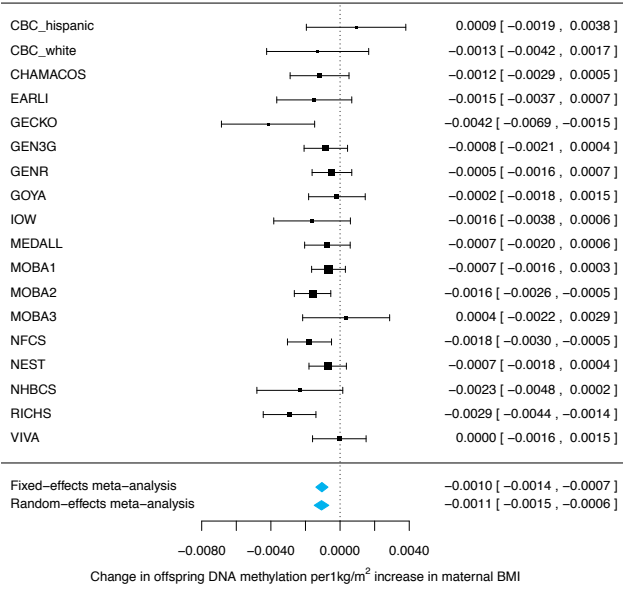

**Forest plot for probe:  
cg09723488 [LHX6]**

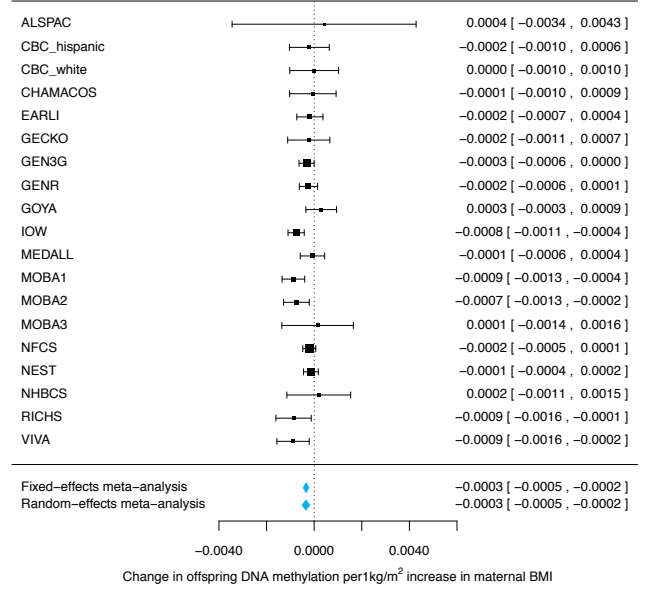

**Forest plot for probe:  
cg13176454 [ST3GAL1]**

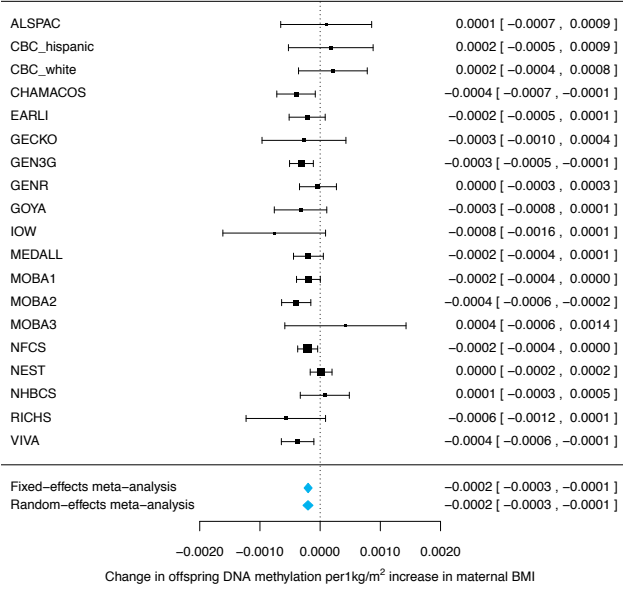

**Forest plot for probe:  
cg14030674 [ANK1]**

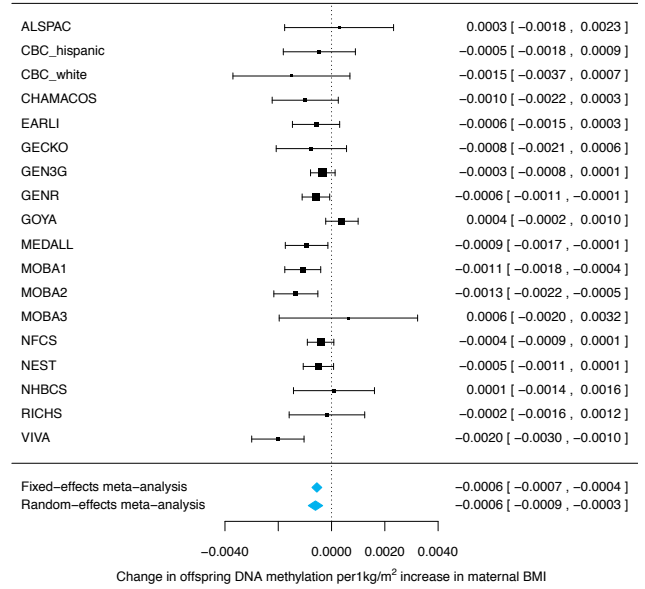

**Forest plot for probe:  
cg27102629 [KAT6B]**

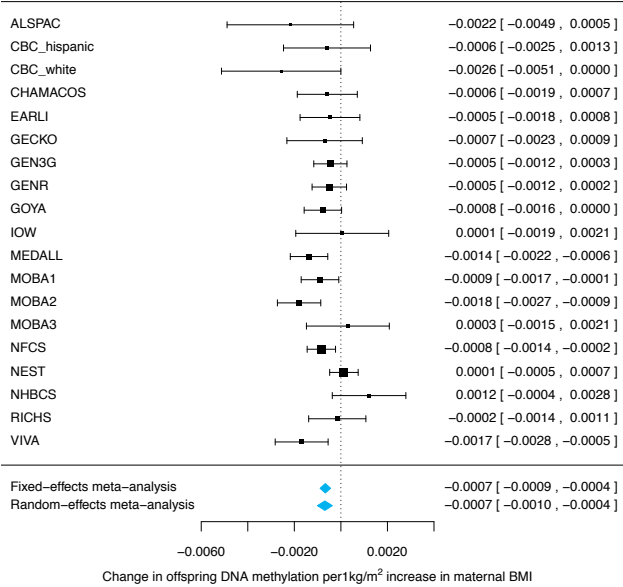

**Forest plot for probe:  
cg06399427 [RBMS1]**

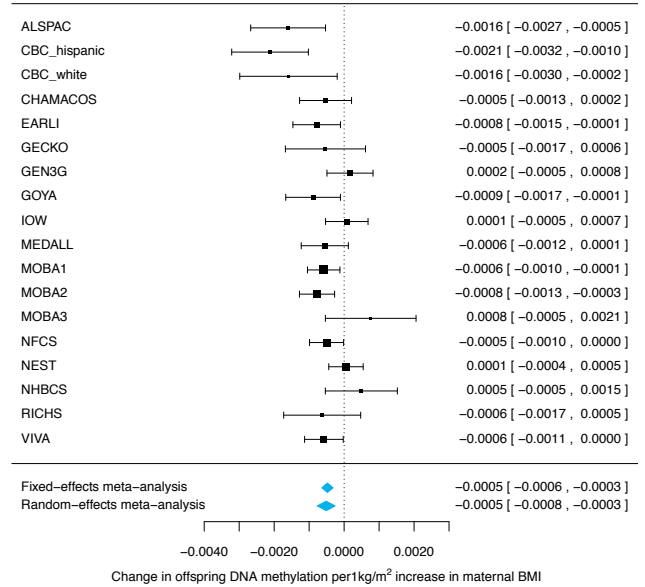

**Forest plot for probe:  
cg01979489 [PDIA2]**

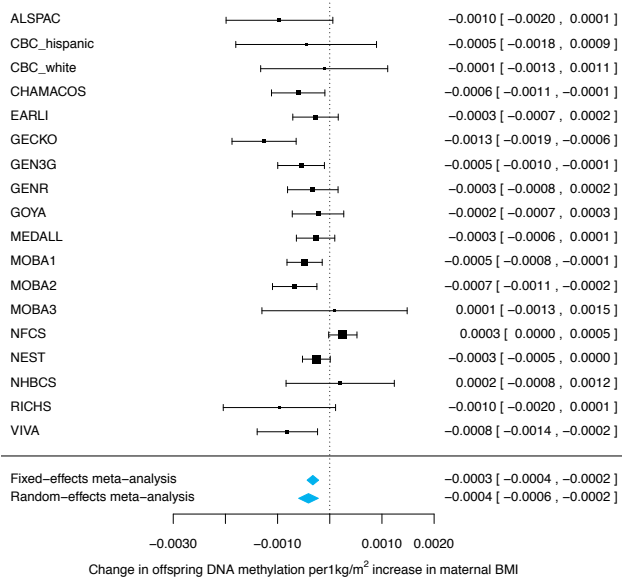

**Forest plot for probe:  
cg05837990 [CDHR3]**

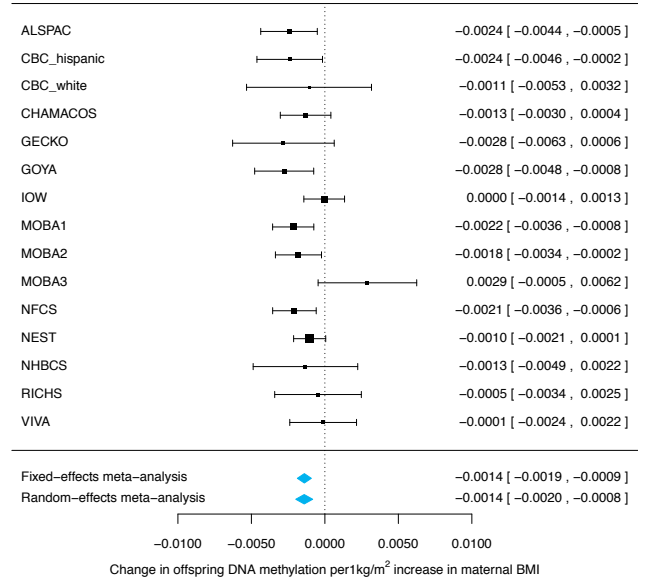

**Forest plot for probe:  
cg21241902 [NELF]**

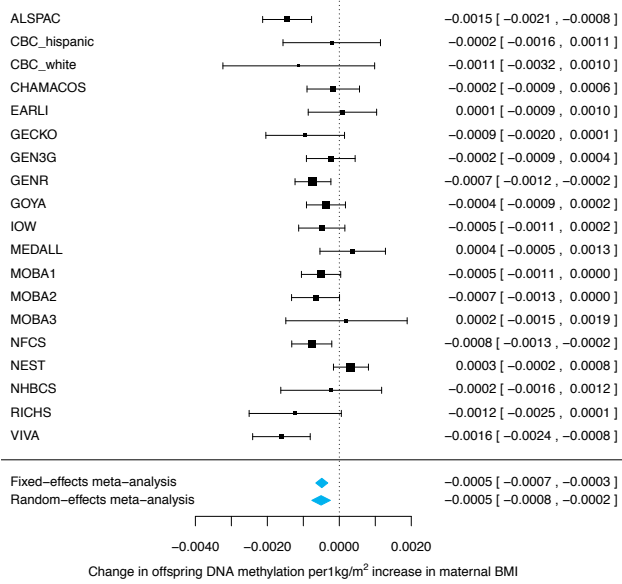

**Forest plot for probe:  
cg00729699 [EPB49]**

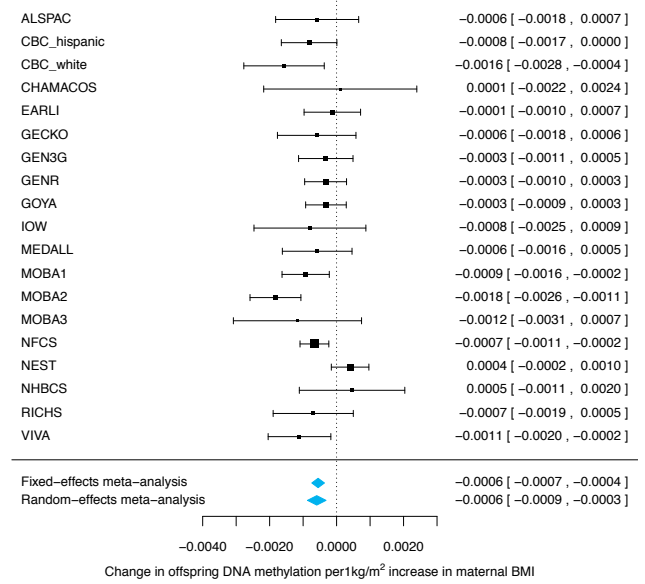

**Forest plot for probe:  
cg03719642 [UCKL1]**

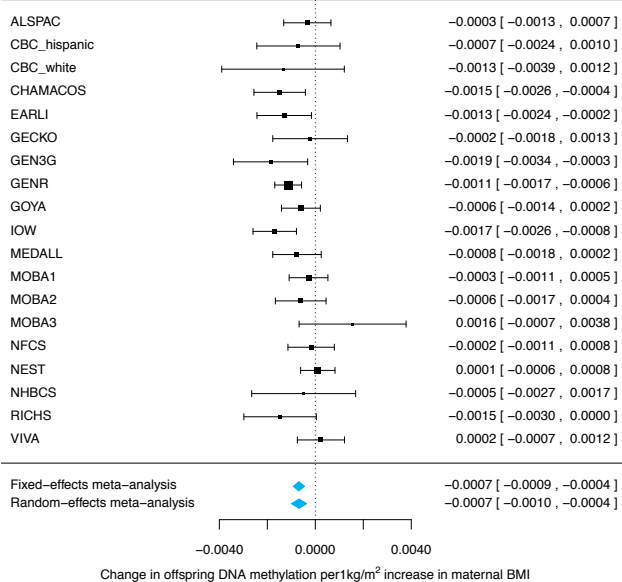

**Forest plot for probe:  
cg18144647 [SFRP1]**

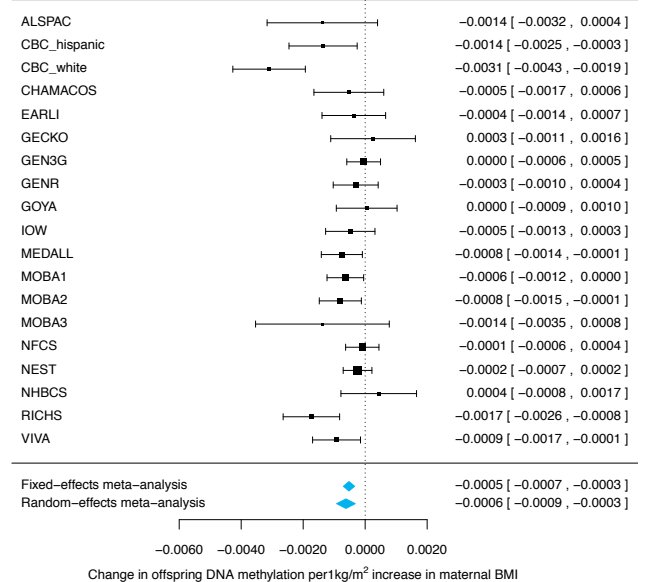

**Forest plot for probe:  
cg21814615 [HCAR1]**

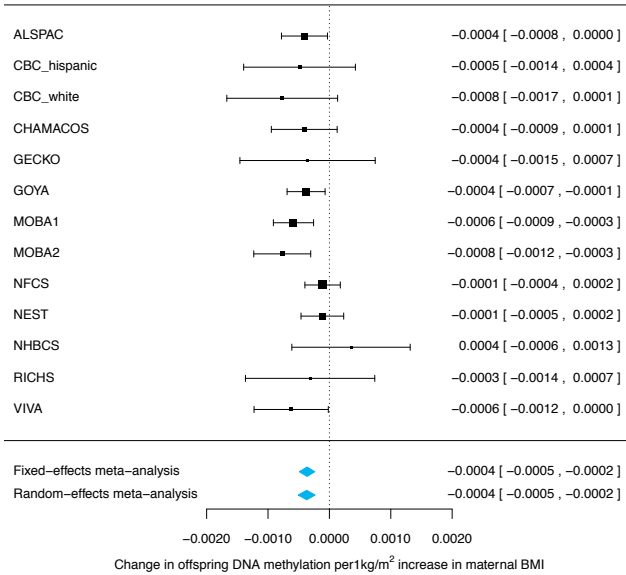

**Forest plot for probe:  
cg14528056 [GBAP1]**

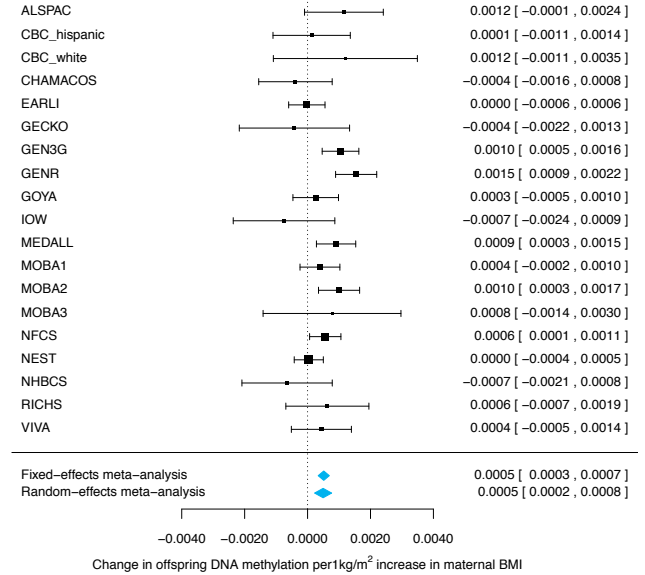

**Forest plot for probe:  
cg22820188 [LMNA]**

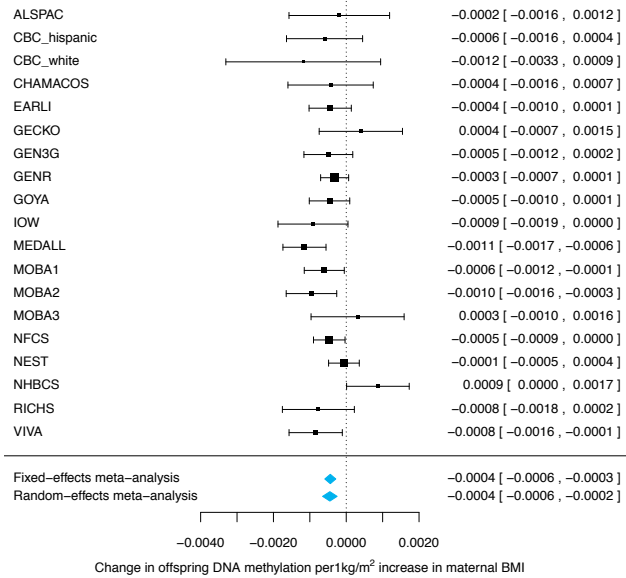

**Forest plot for probe:  
cg08289937 [DDHD1]**

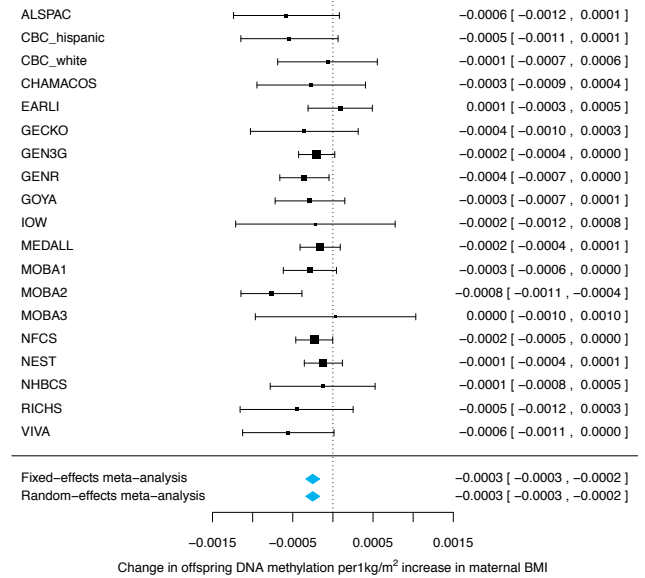

**Forest plot for probe:  
cg21186778 [AK021739]**

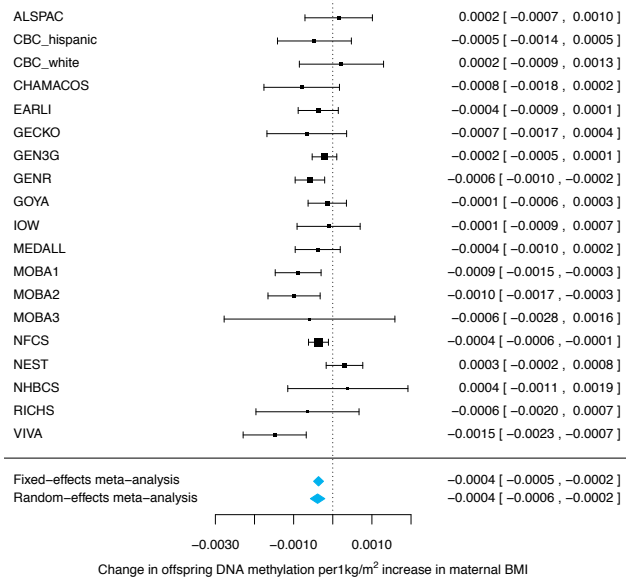

**Forest plot for probe:  
cg17514558 [PCDHB19P]**

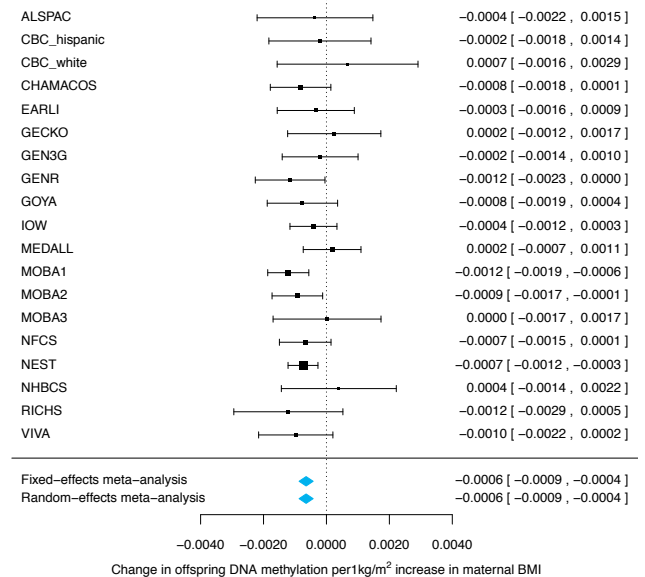

**Forest plot for probe:  
cg15240102 [LOC286083]**

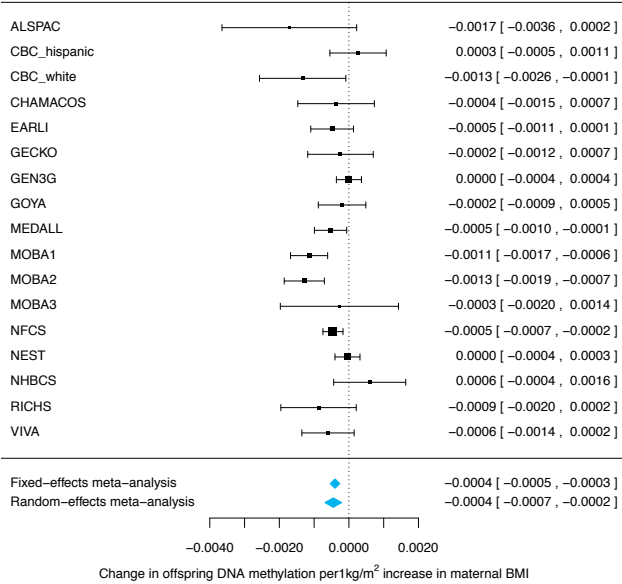

**Forest plot for probe:  
cg21026022 [CABYR]**

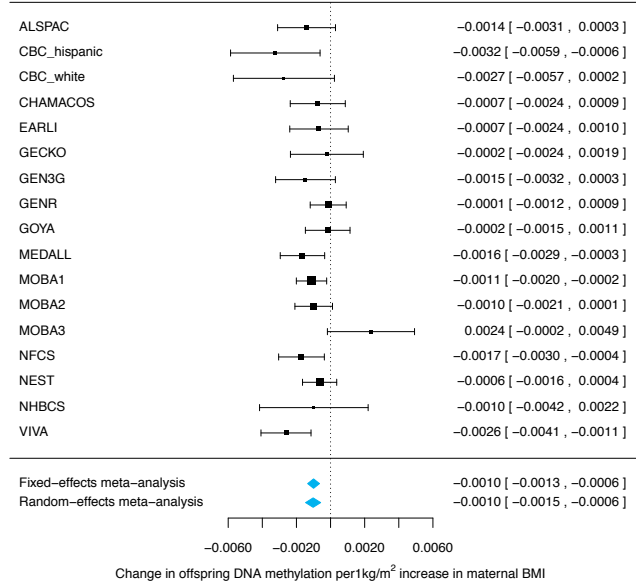

**Forest plot for probe:  
cg18995031 [RASA3]**

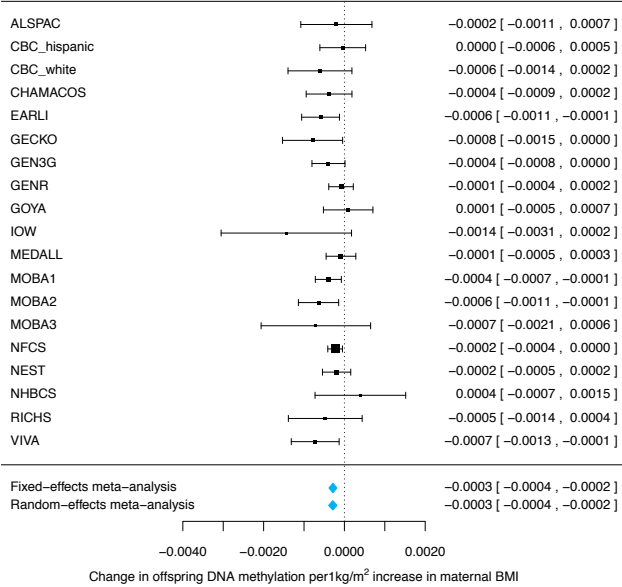

**Forest plot for probe:  
cg04027757 [POM121L1P]**

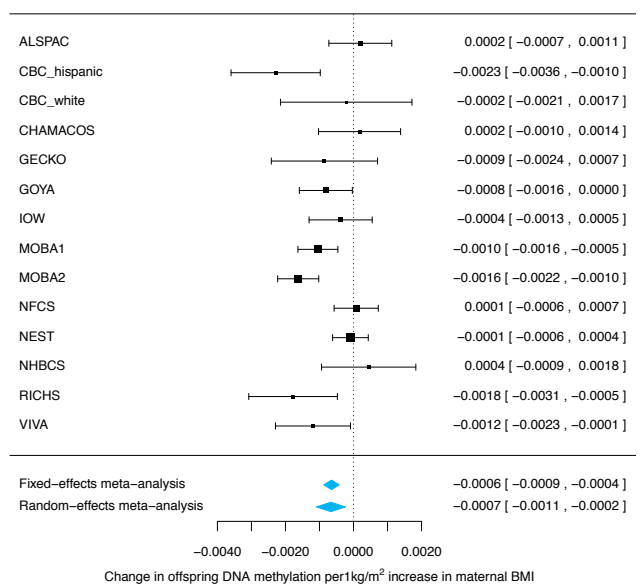

**Forest plot for probe:  
cg01963618 [LOC285768]**

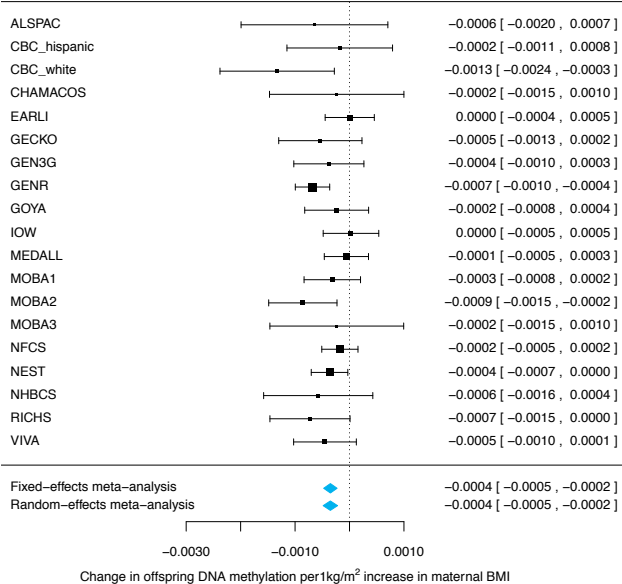

**Forest plot for probe:  
cg21445553 [GGTLC1]**

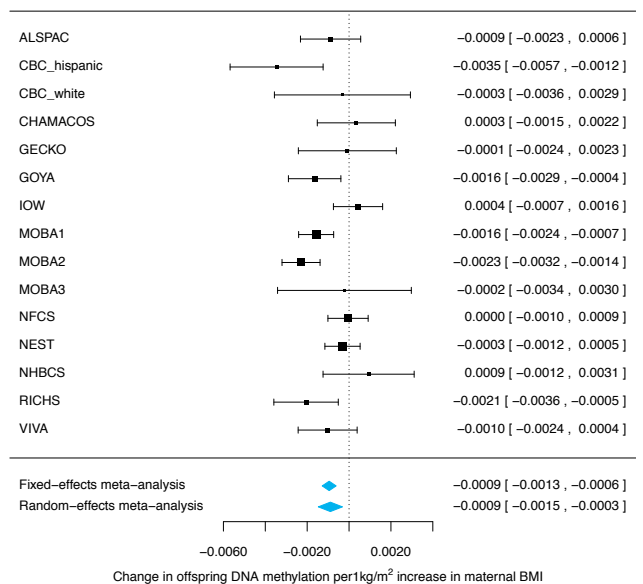

**Forest plot for probe:  
cg05976575 [CMTM2]**

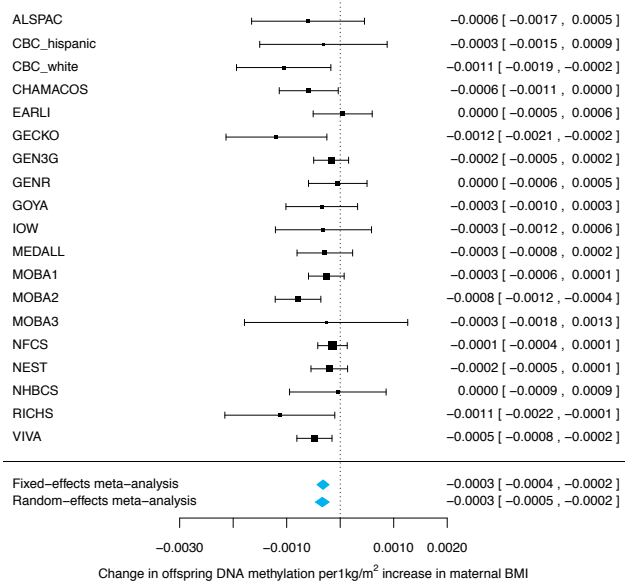

**Forest plot for probe:  
cg13758186 [CREG2]**

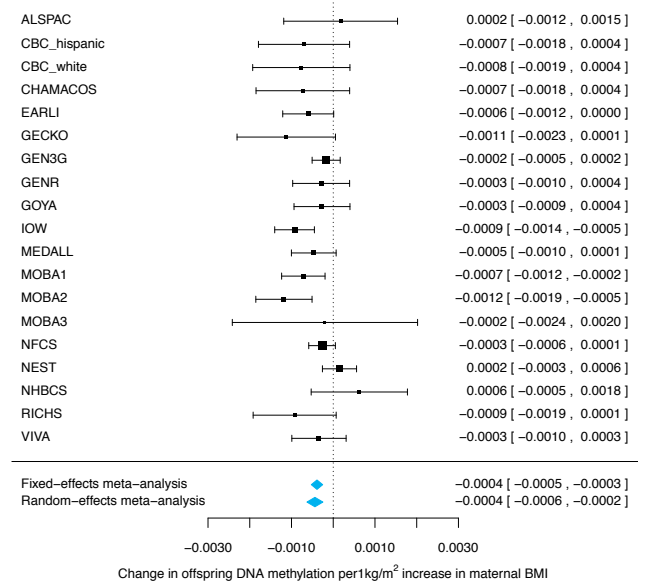

**Forest plot for probe:  
cg20710902 [DQ594093]**

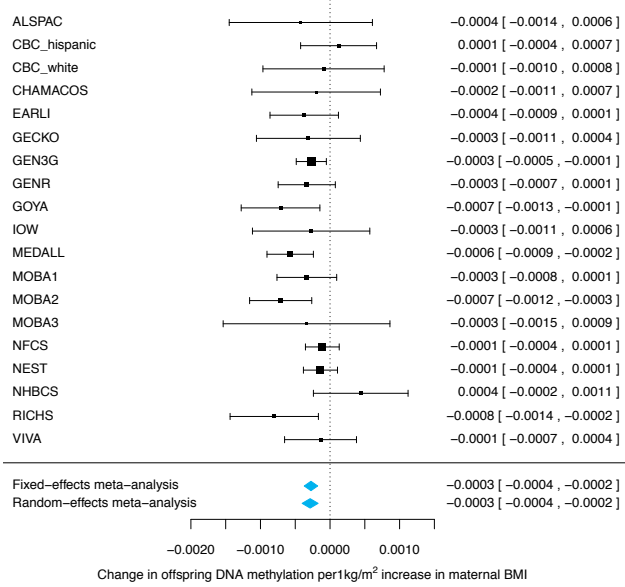

**Forest plot for probe:  
cg03046925 [TRIM15]**

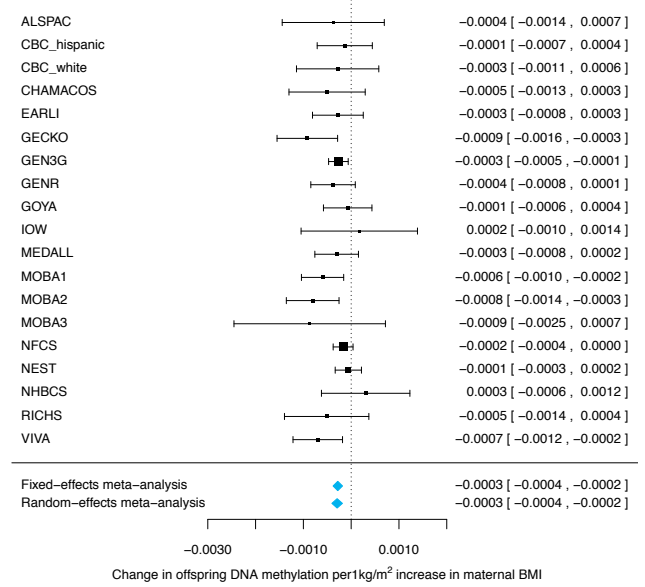

**Forest plot for probe:  
cg18330571 [MIR4297]**

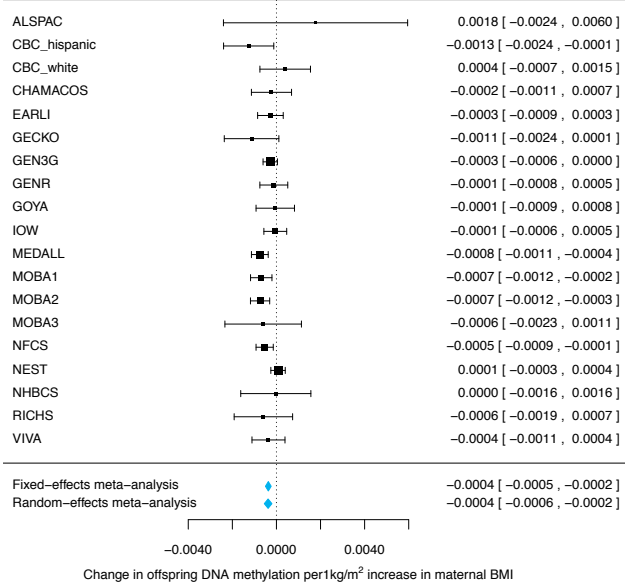

**Forest plot for probe:  
cg11156132 [PRKCD]**

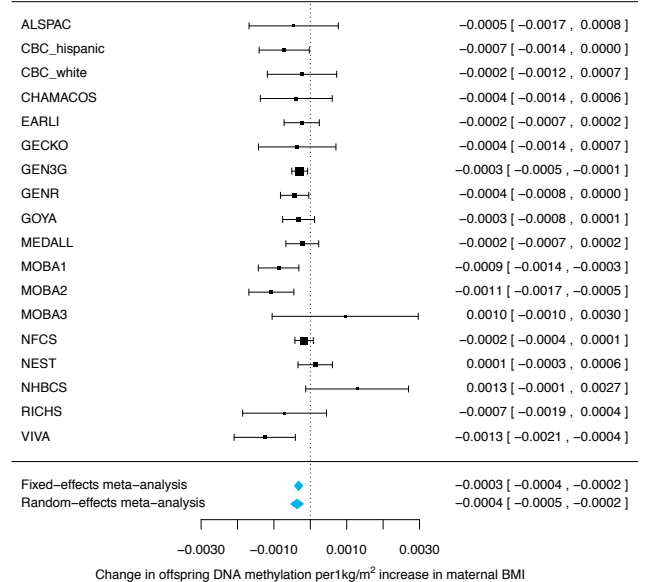



**Forest plot for probe:  
cg18499001 [Y\_RNA]**

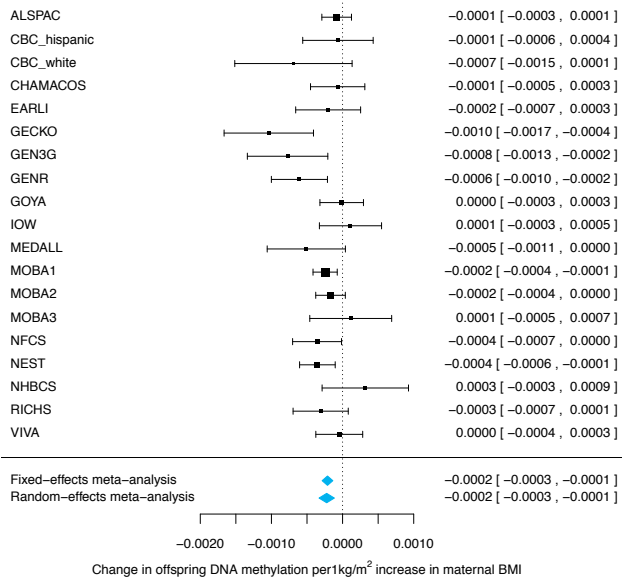

**Forest plot for probe:  
cg05113927 [UCN]**

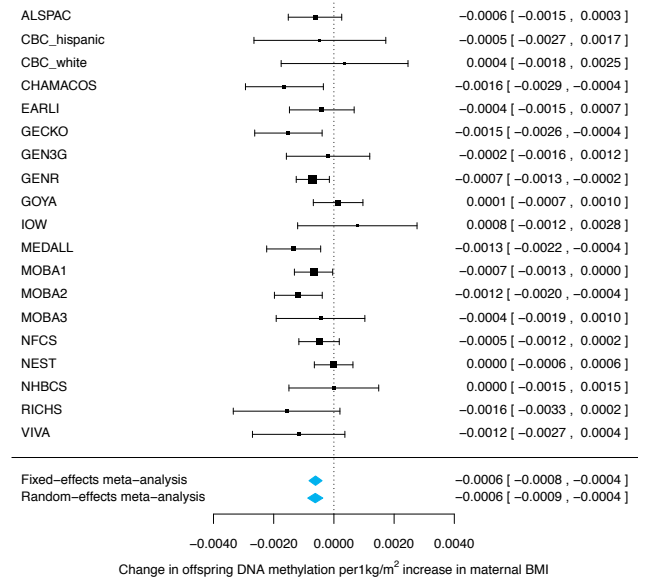

**Forest plot for probe:  
cg22670329 [CXCL6]**

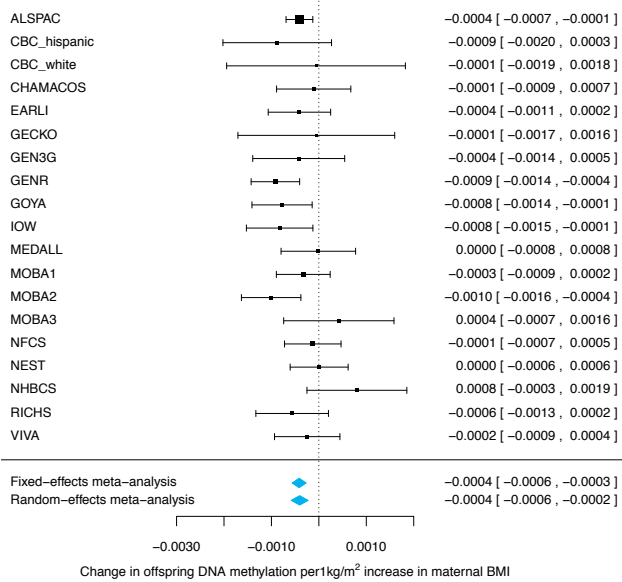

**Forest plot for probe:  
cg15913725 [TSSC1]**

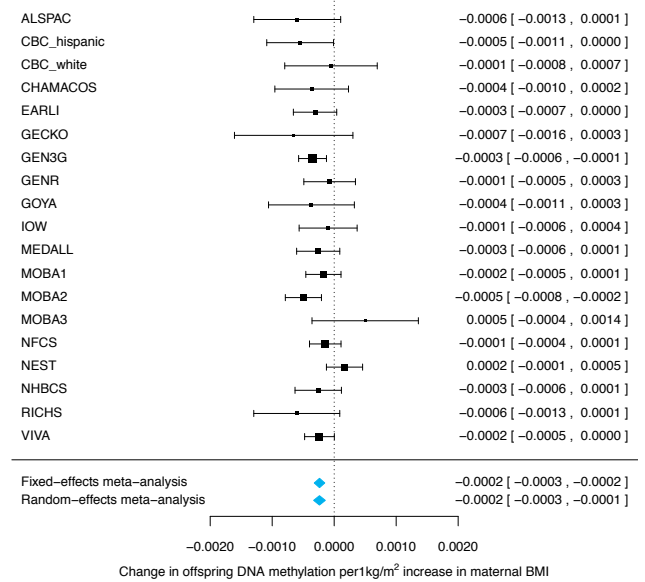

**Forest plot for probe:  
cg01881287 [EFCAB10]**

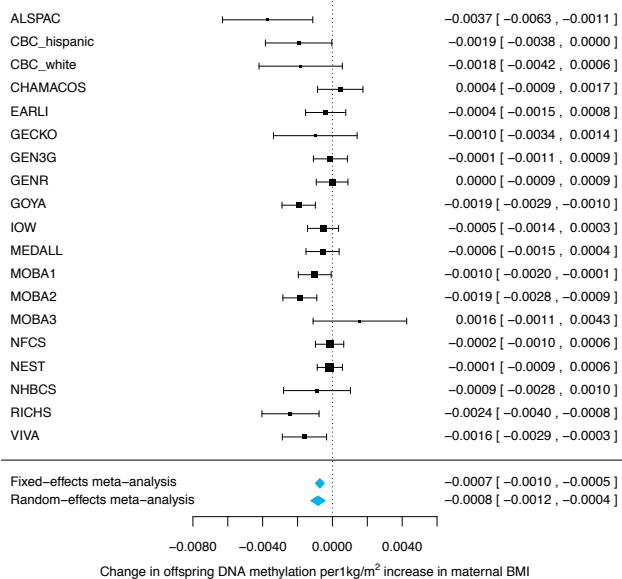

**Forest plot for probe:  
cg05635274 [PRSS21]**

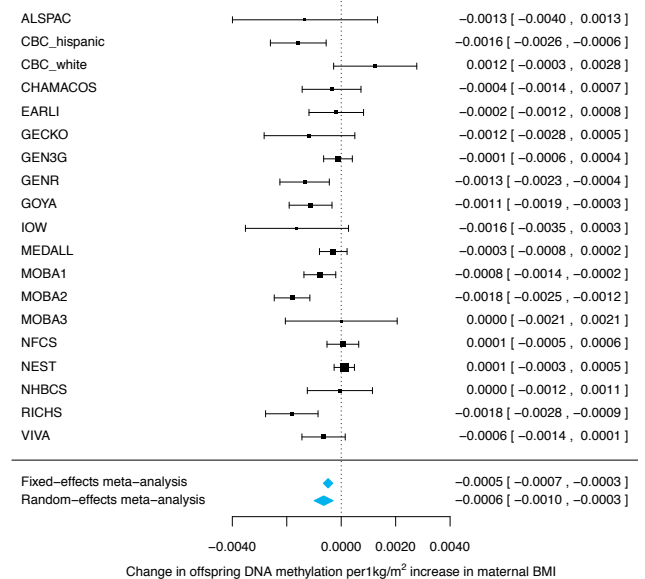

**Forest plot for probe:  
cg03221837 [IRX3]**

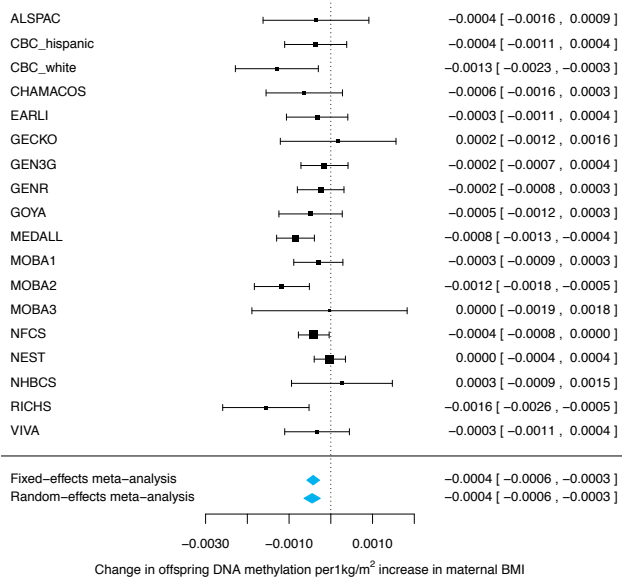

**Forest plot for probe:  
cg13557773 [RASA3]**

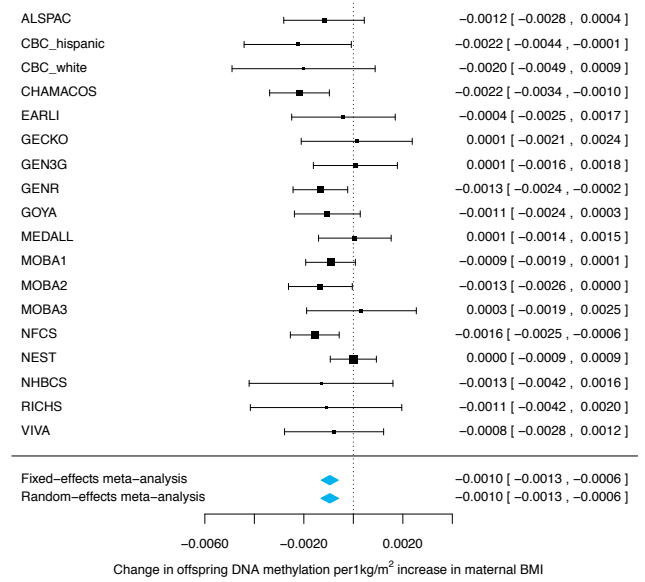

**Forest plot for probe:  
cg14434213 [RNF5P1]**

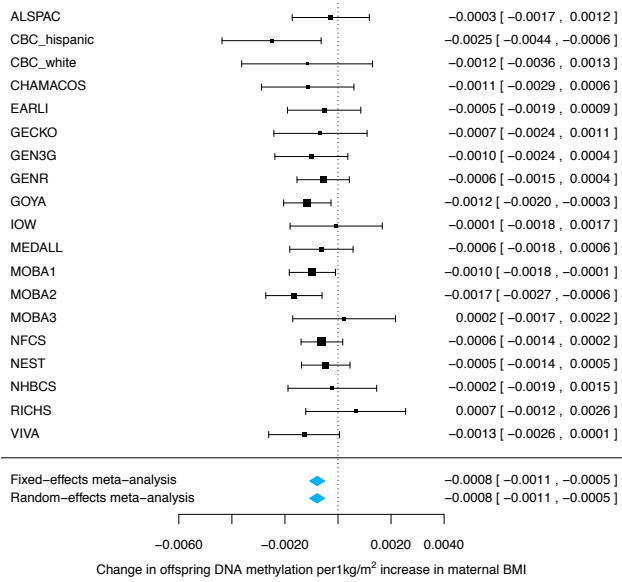

**Forest plot for probe:  
cg05659486 [AK056584]**

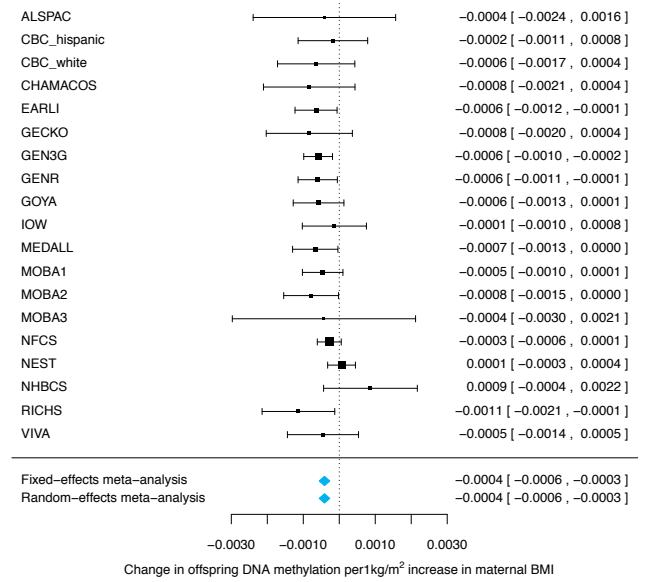

**Forest plot for probe:  
cg22545168 [LAIR1]**

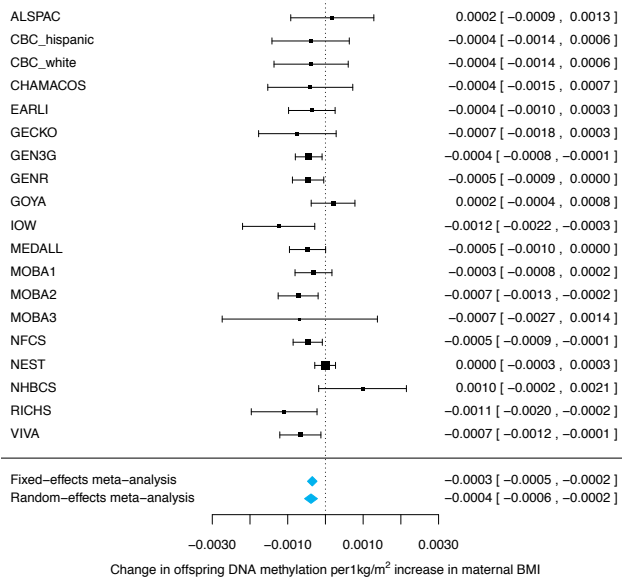

**Forest plot for probe:  
cg15029475 [C5orf38]**

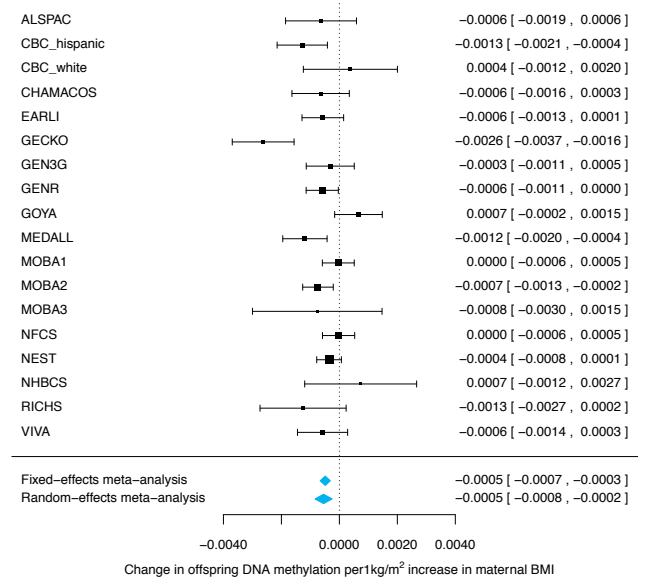

**Forest plot for probe:  
cg23749005 [PTPRN2]**

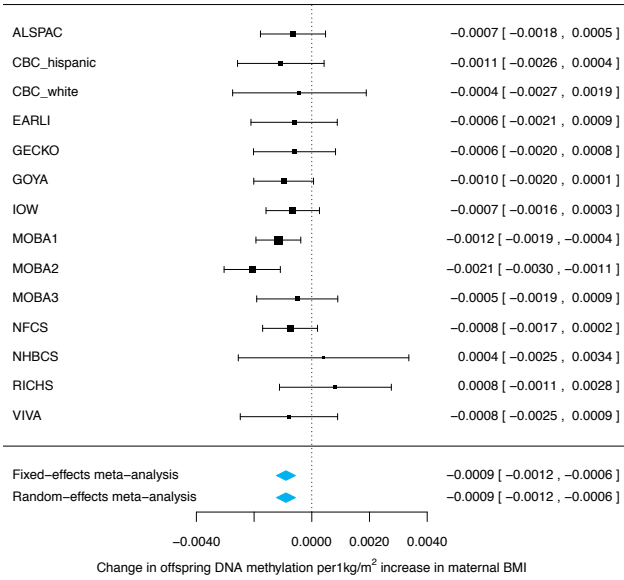

**Forest plot for probe:  
cg23111106 [AK126213]**

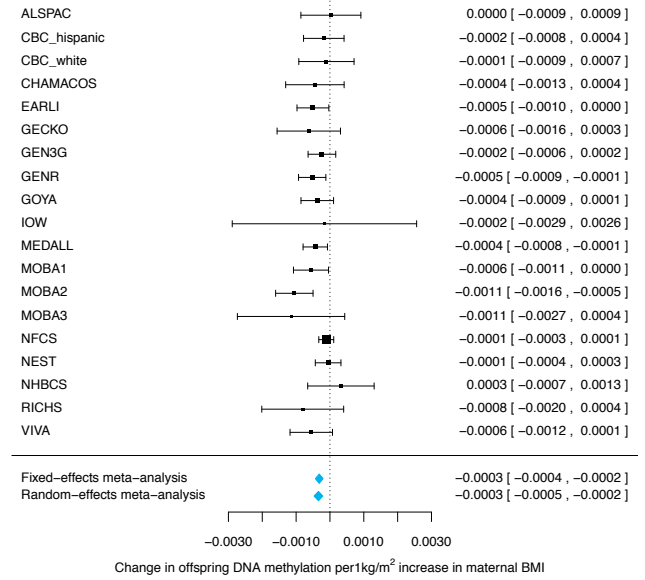

**Forest plot for probe:  
cg21937867 [PRCD]**

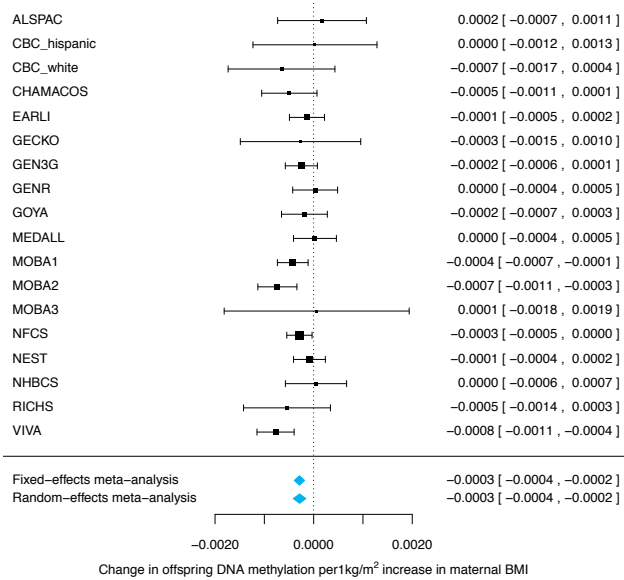

**Forest plot for probe:  
cg04972348 [MIR200B]**

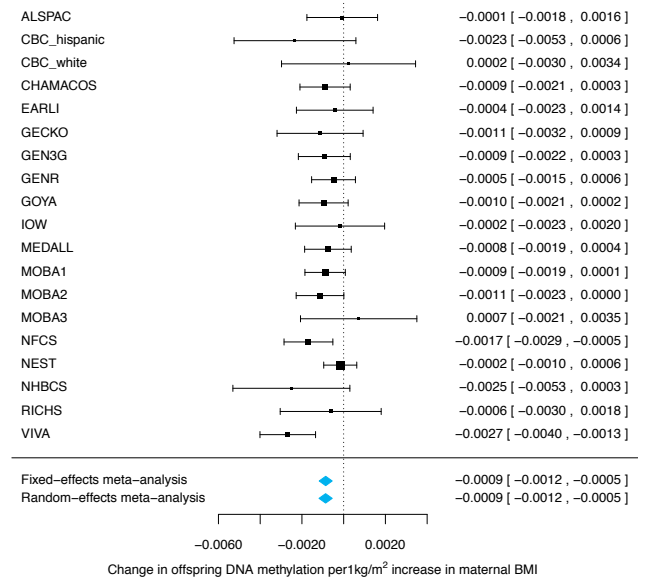

**Forest plot for probe:  
cg05881436 [SNAPC1]**

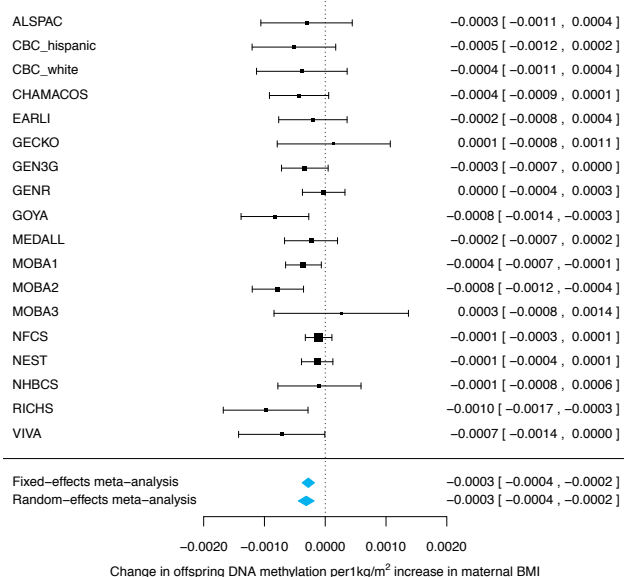

**Forest plot for probe:  
cg23166970 [MCCC1]**

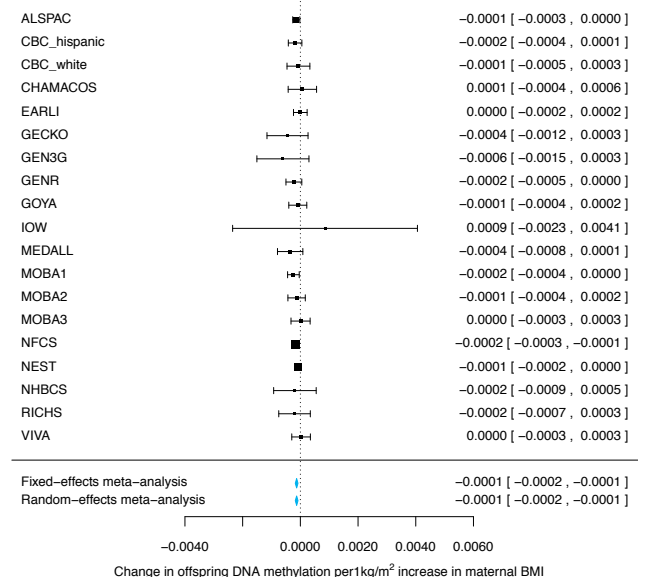

**Forest plot for probe:  
cg08407524 [BC034788]**

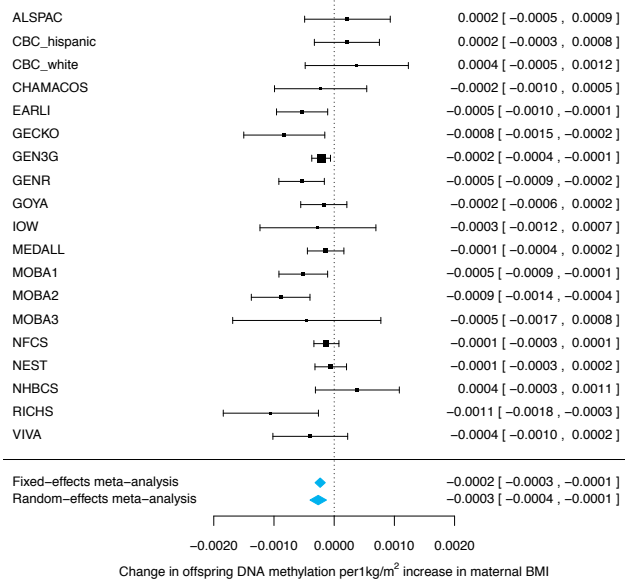

**Forest plot for probe:  
cg01428678 [GPHN]**

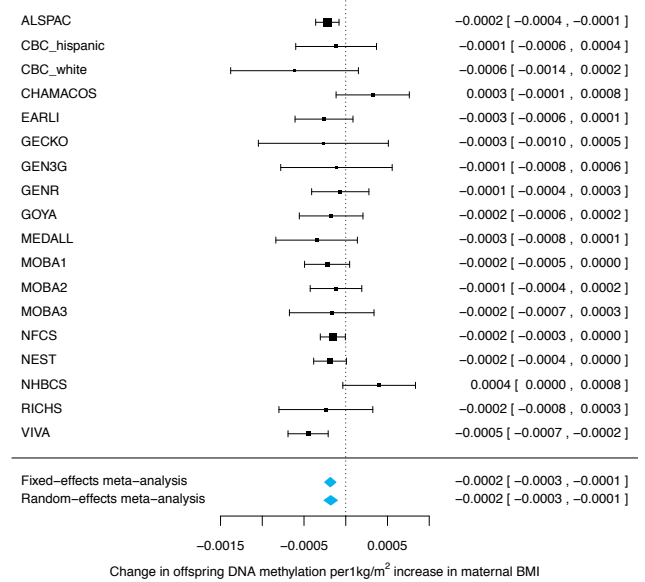

**Forest plot for probe:  
cg26284544 [LOC100507588]**

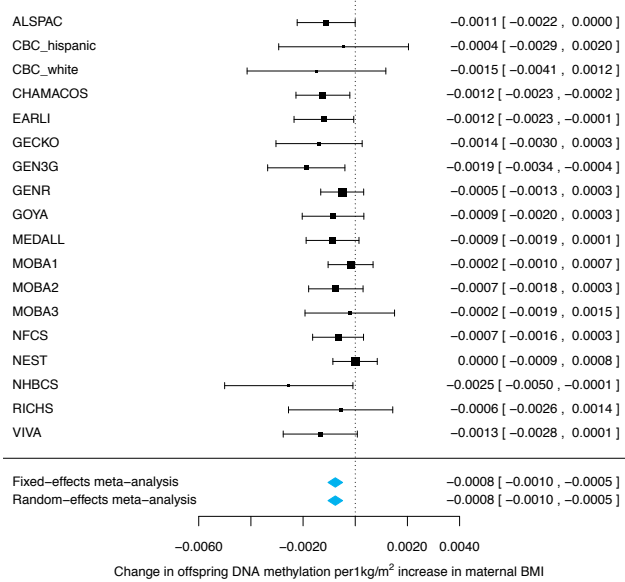

**Forest plot for probe:  
cg12155036 [LOC100131551]**

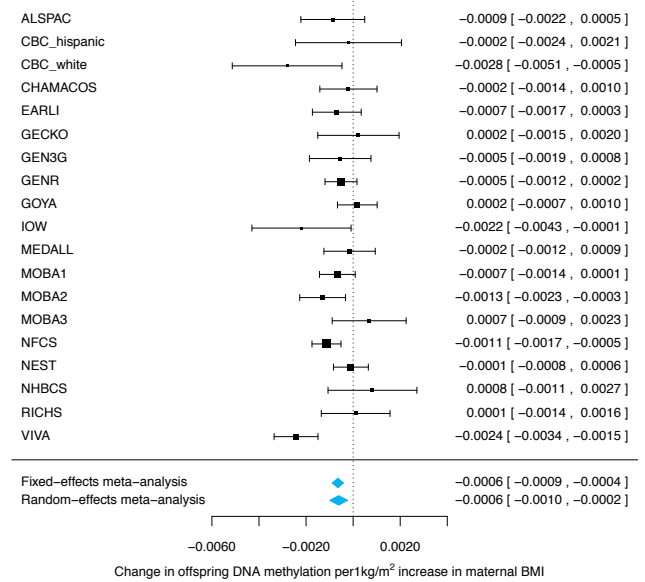

**Forest plot for probe:  
cg25432807 [POM121L1P]**

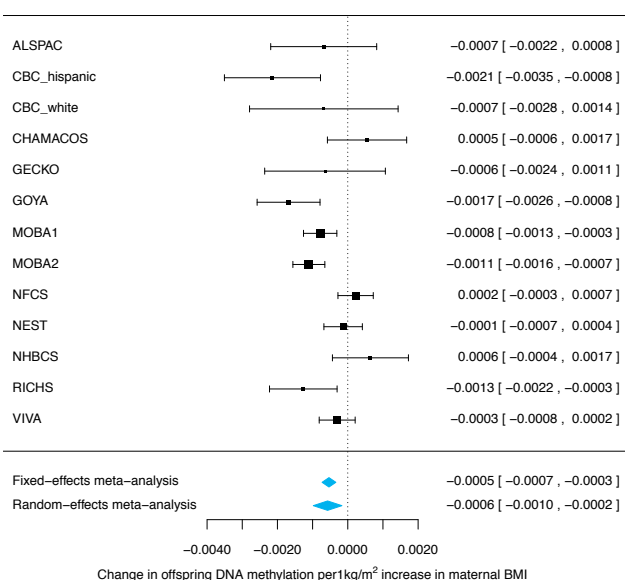

**Forest plot for probe:  
cg25521481 [TTBK1]**

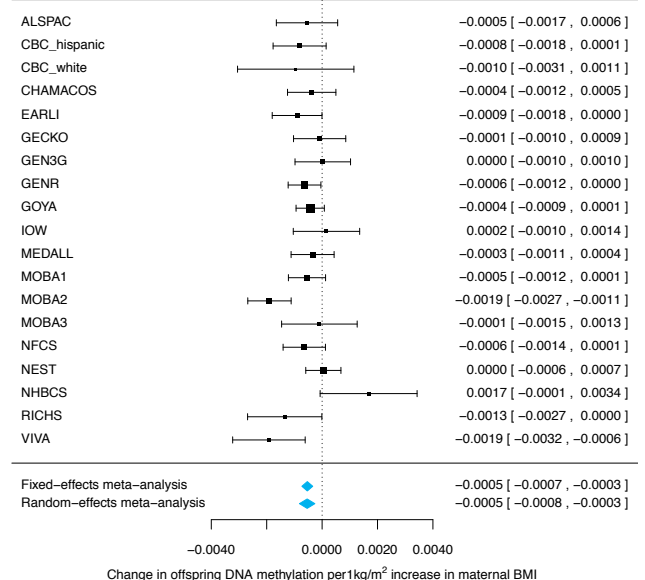

Forest plot for probe:  
cg25185429 [EGOT]

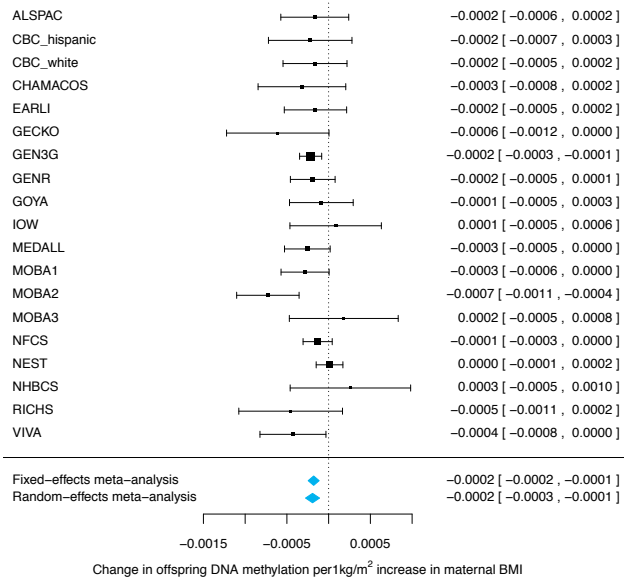

Forest plot for probe:  
cg01517690 [ZSWIM2]

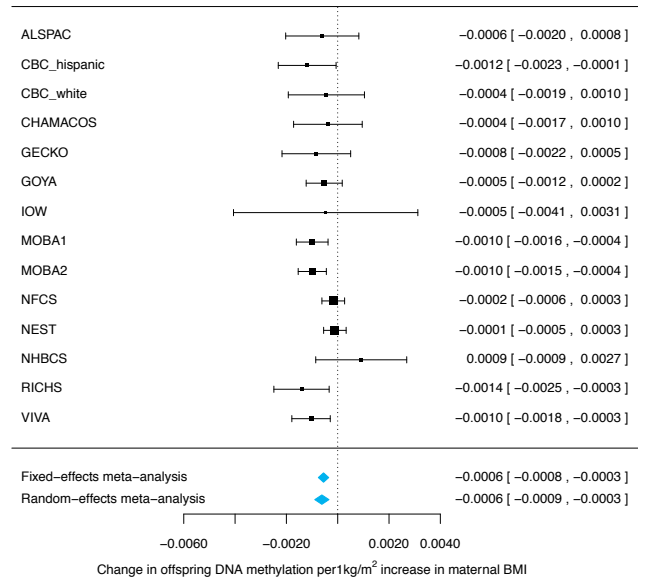

## Leave-one-out plots for the cell-adjusted continuous BMI model

Plots show  $-\log_{10}$  P-values for meta-analyses with each cohort (x-axis) omitted. The red, full horizontal line indicates the  $-\log_{10}$  P-value for the meta-analysis with all cohorts included. The black, dashed horizontal line indicates the Bonferroni cut off for genome-wide significance ( $1.06 * 10^{-7}$ ).

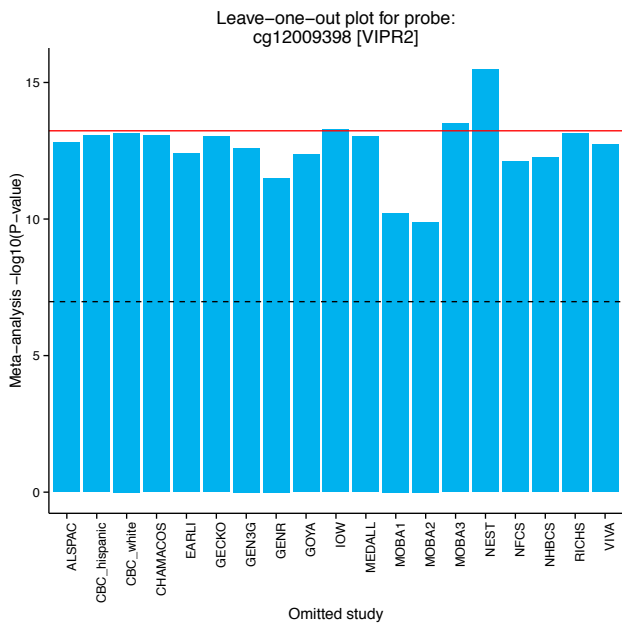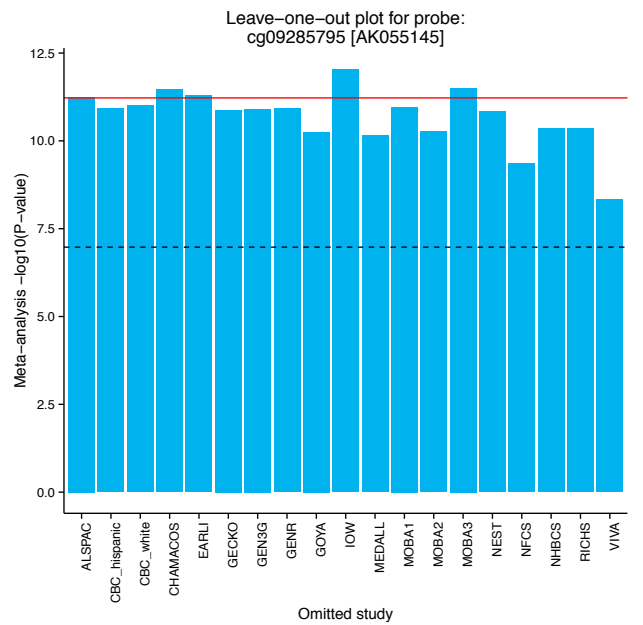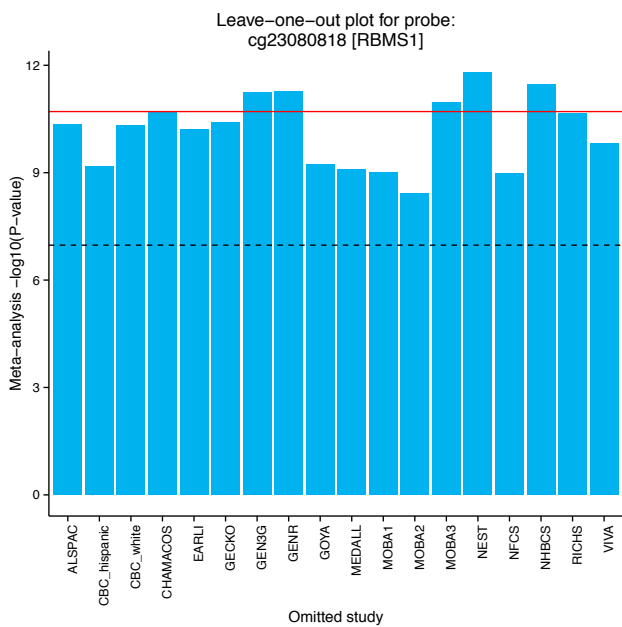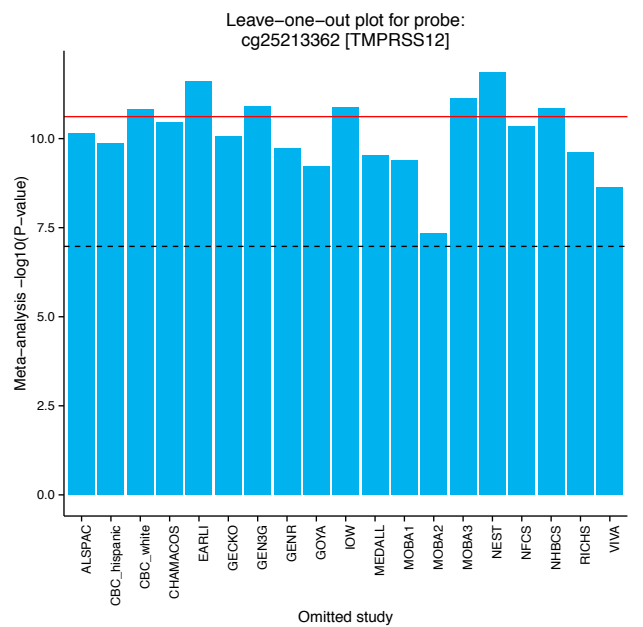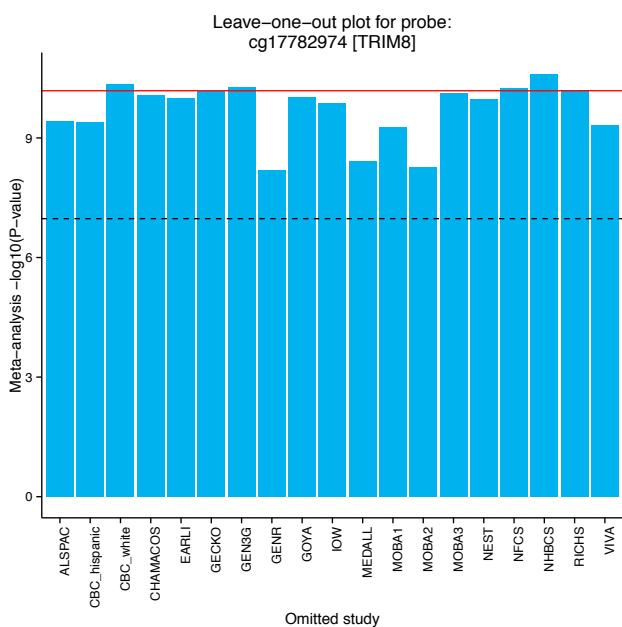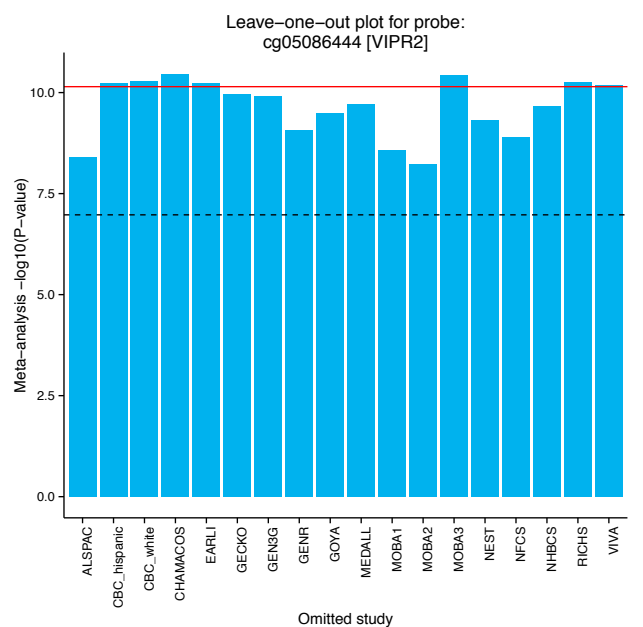

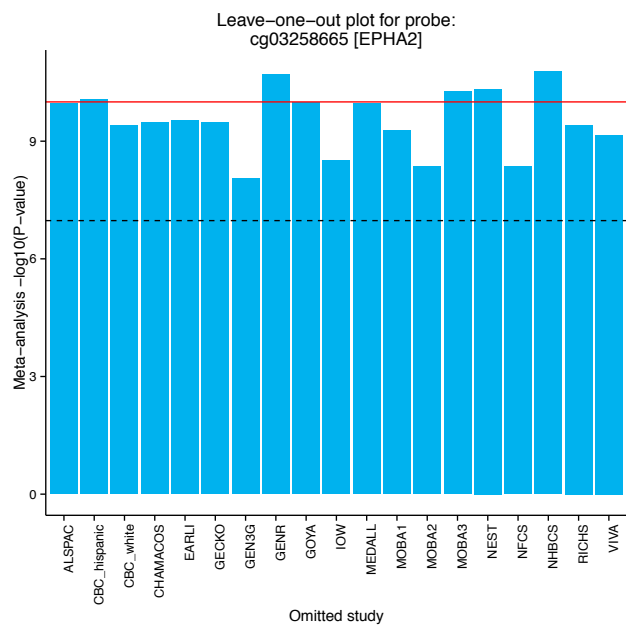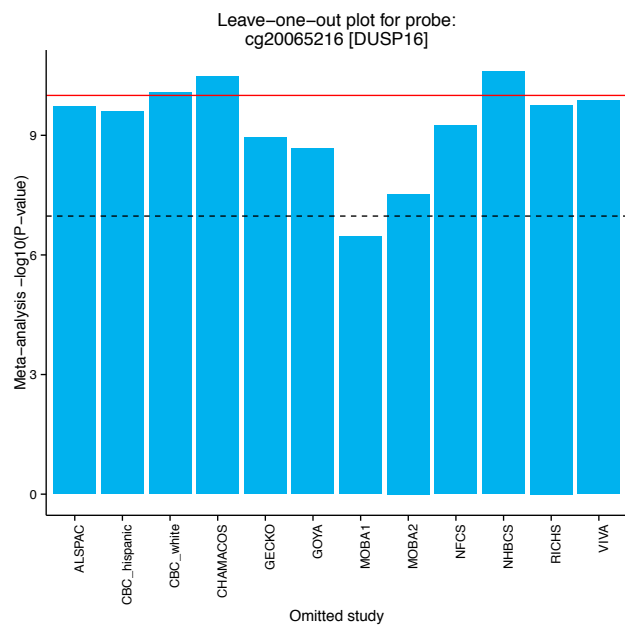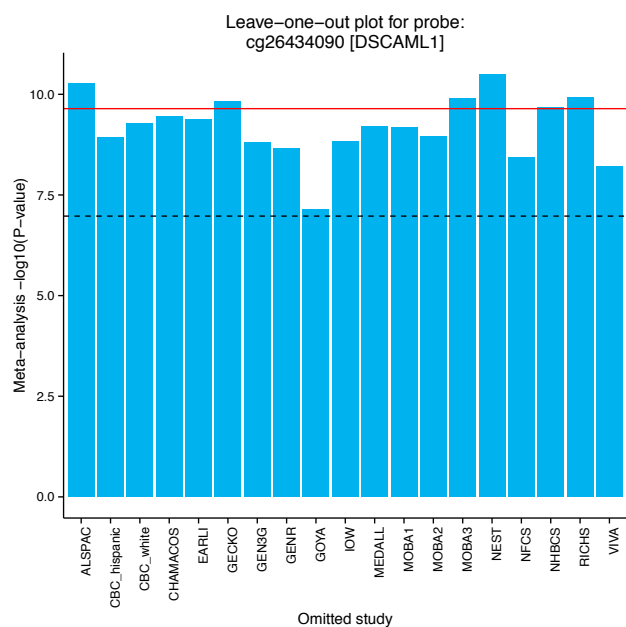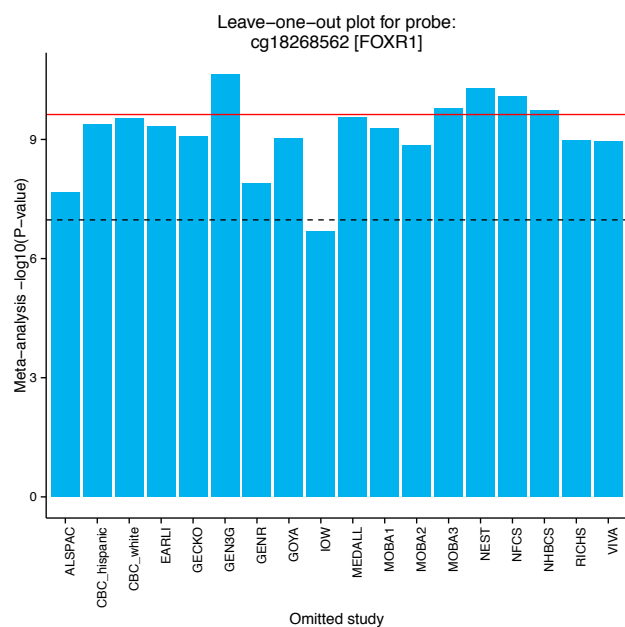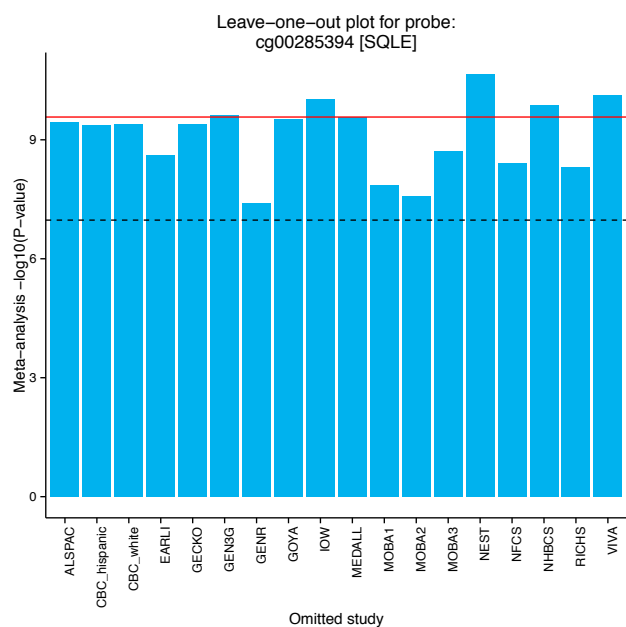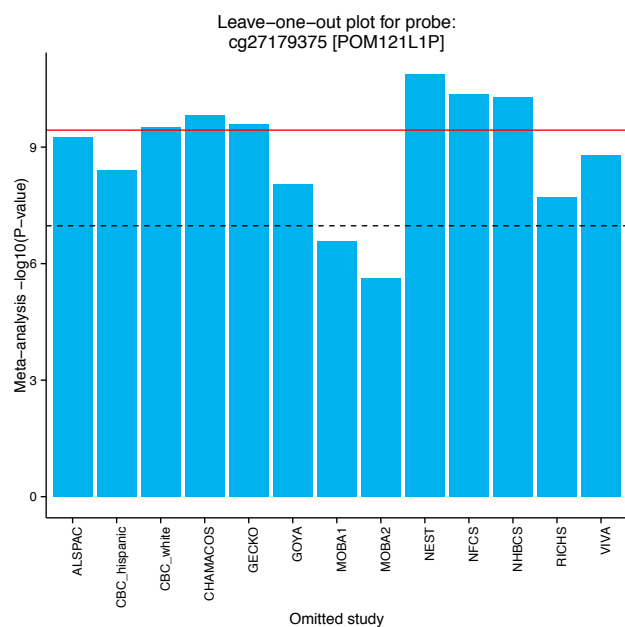



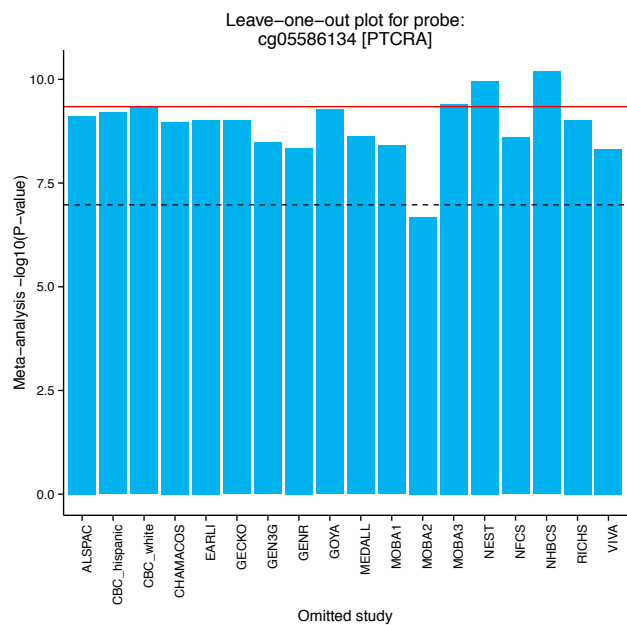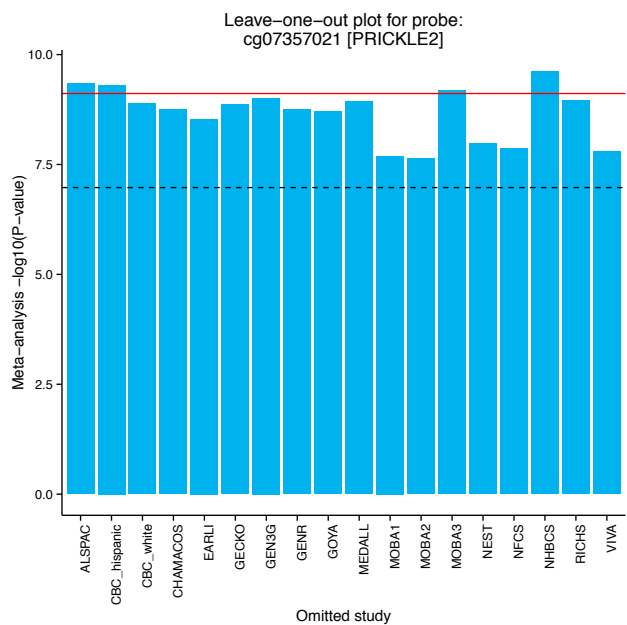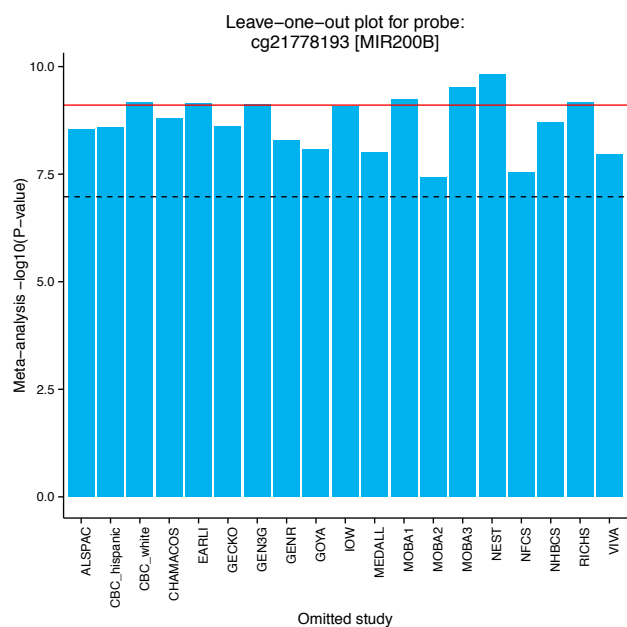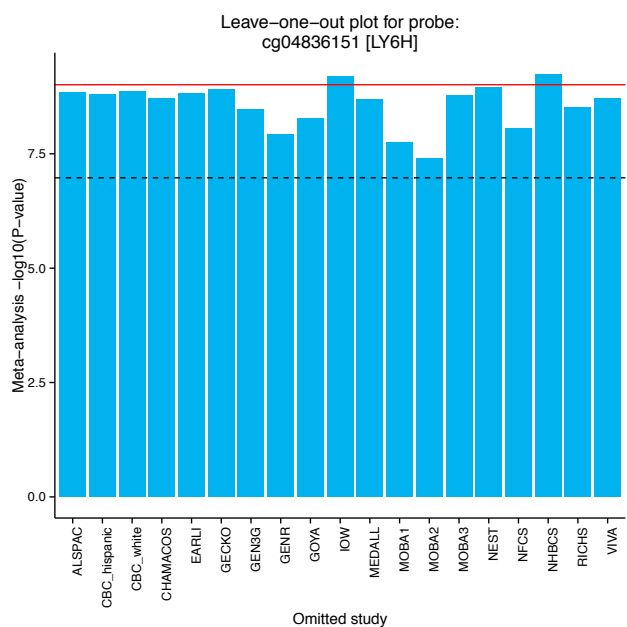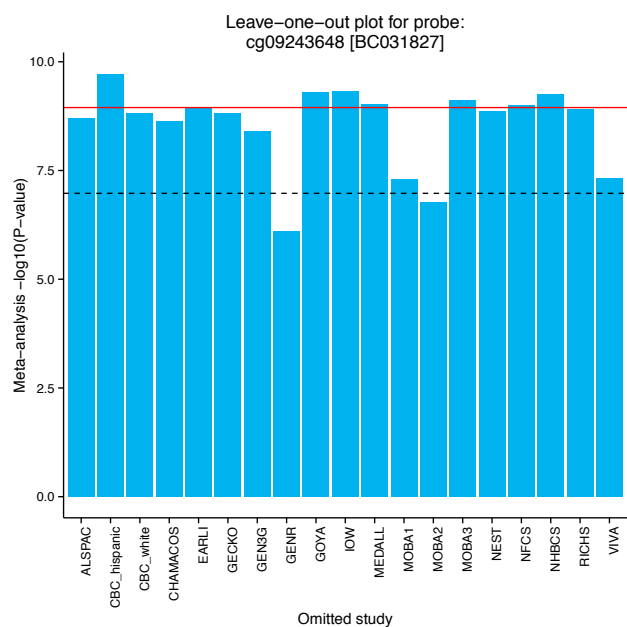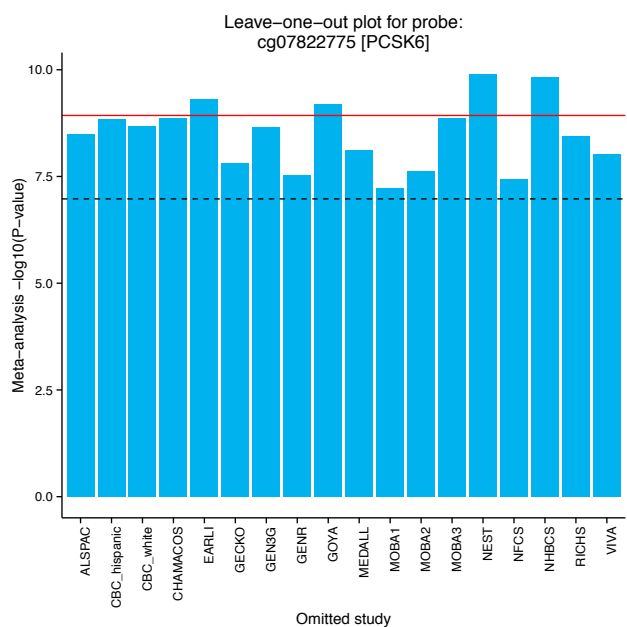

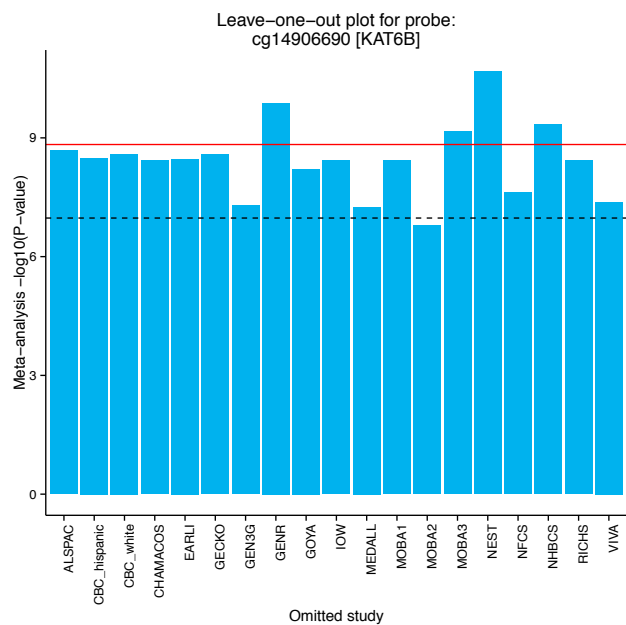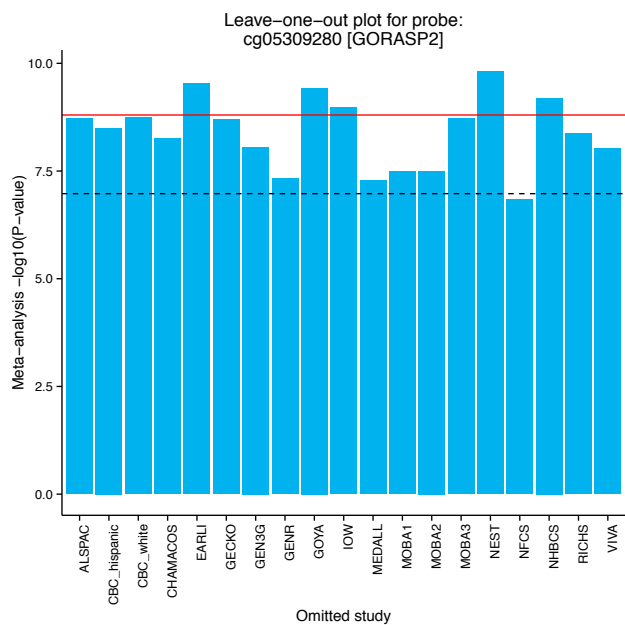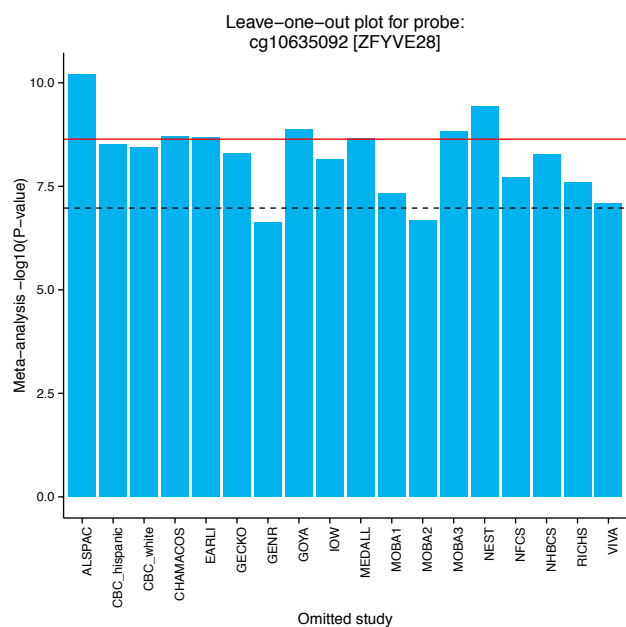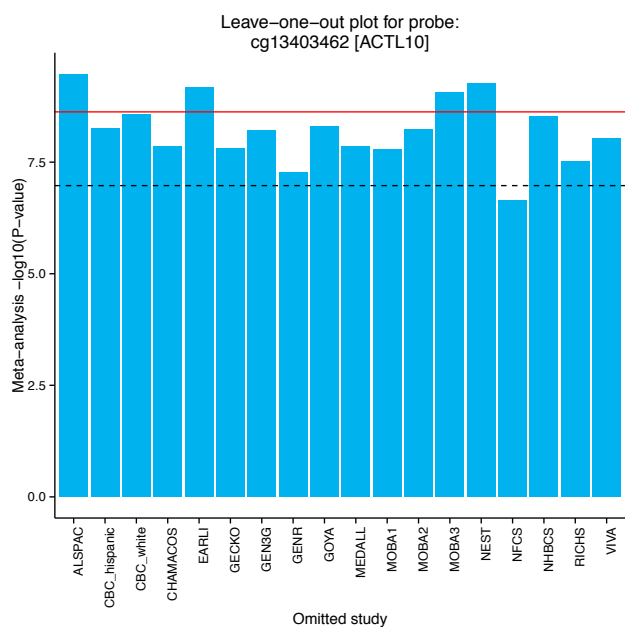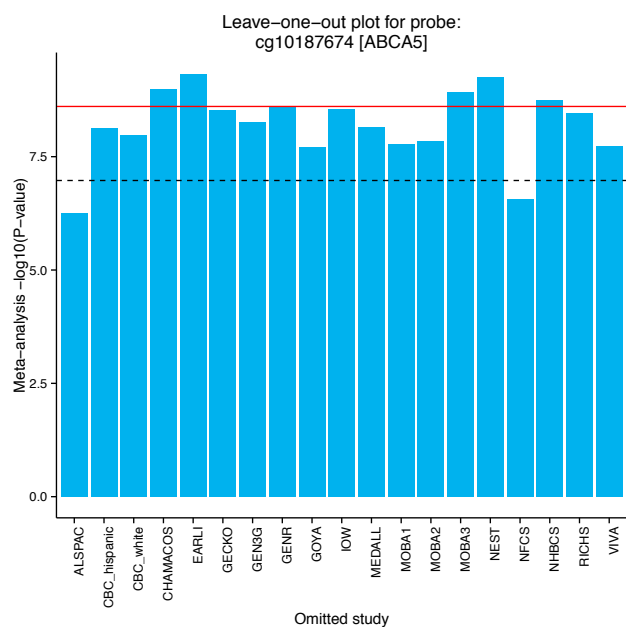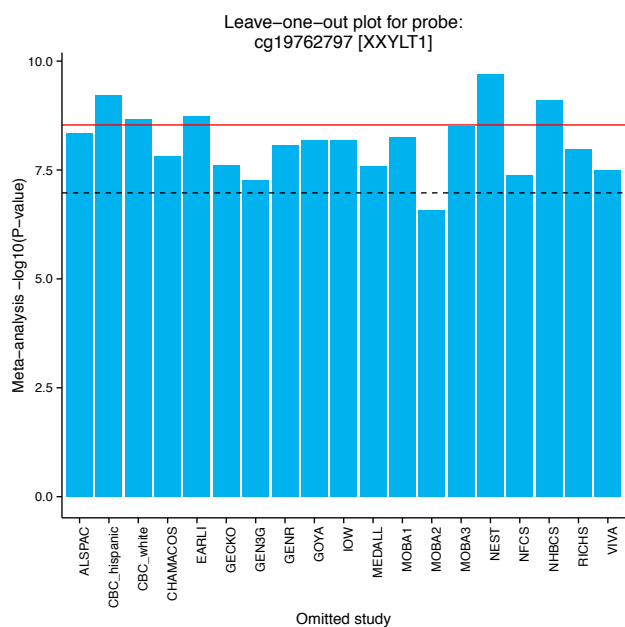

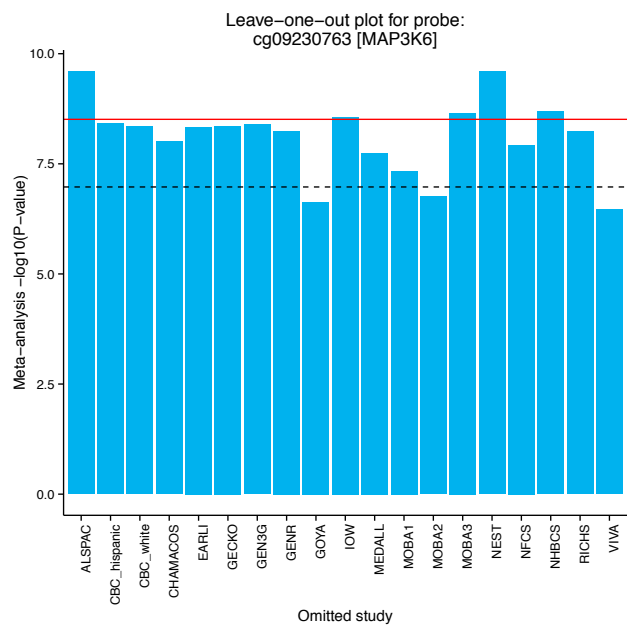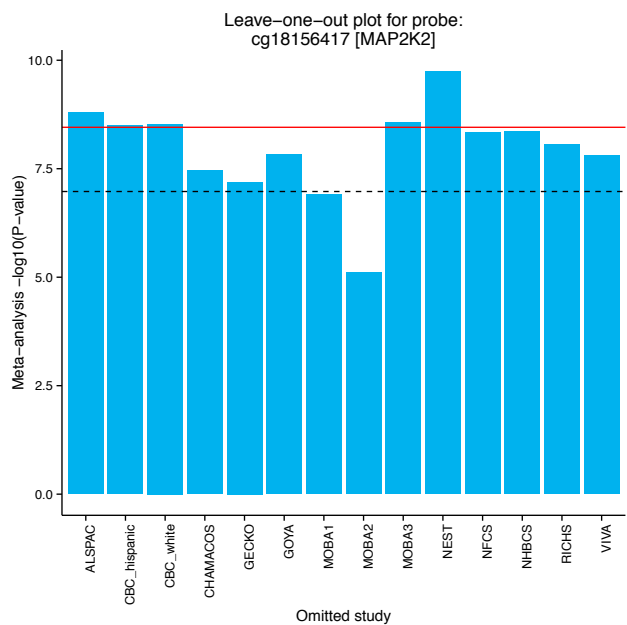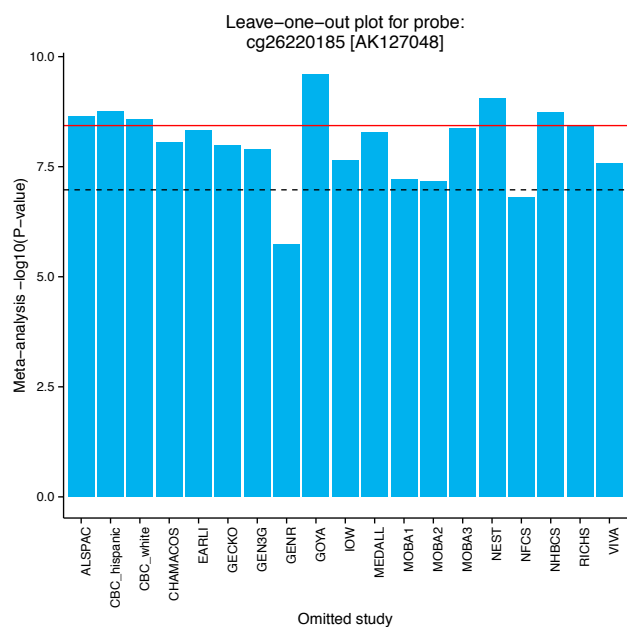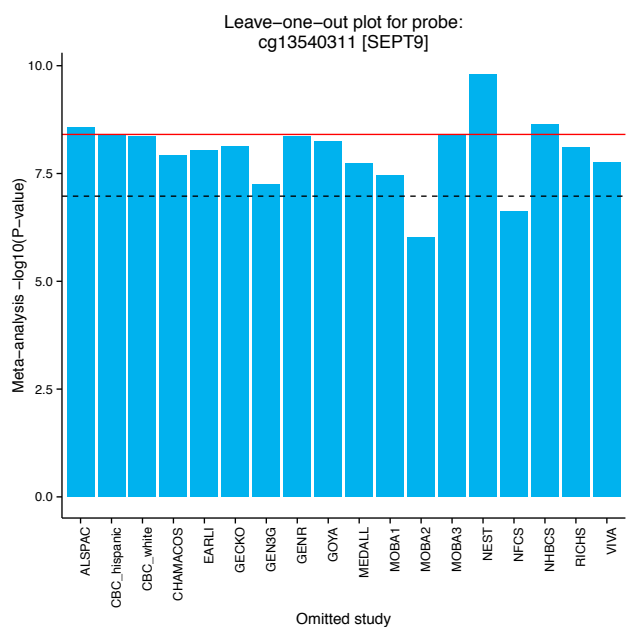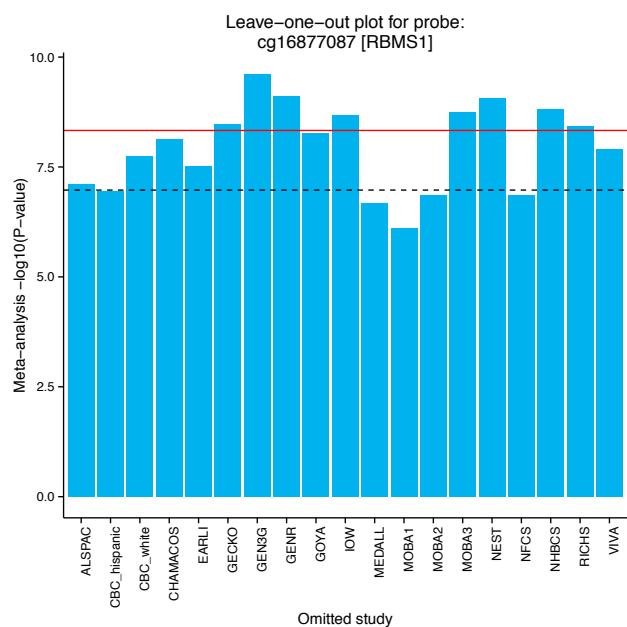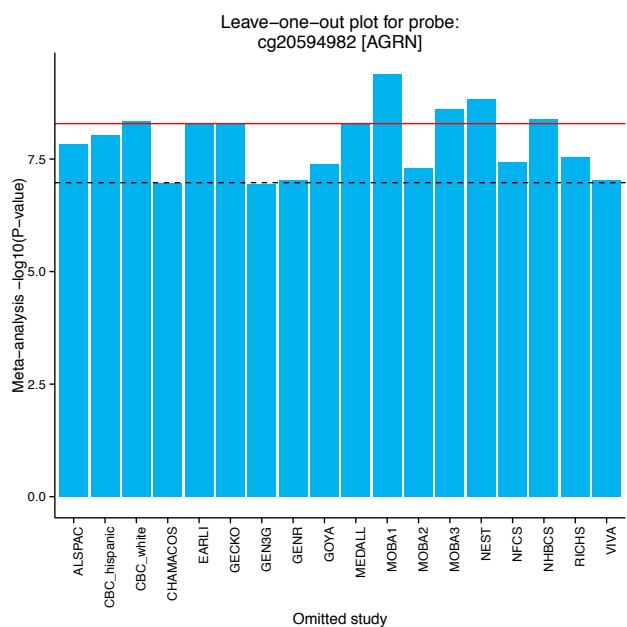

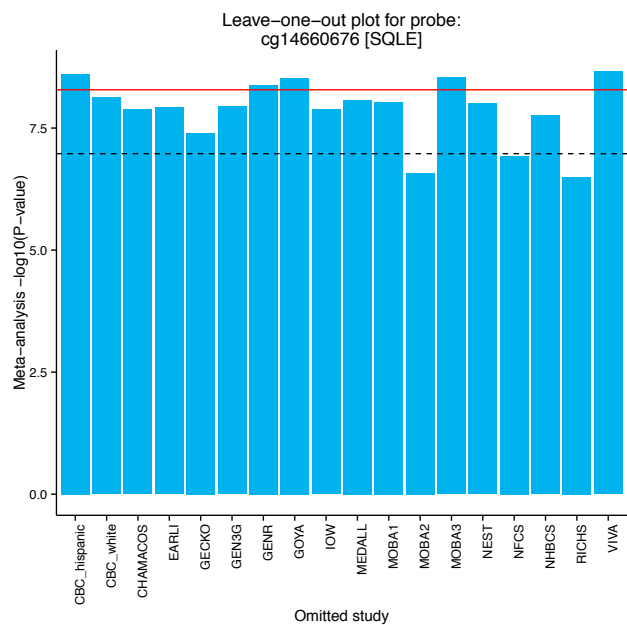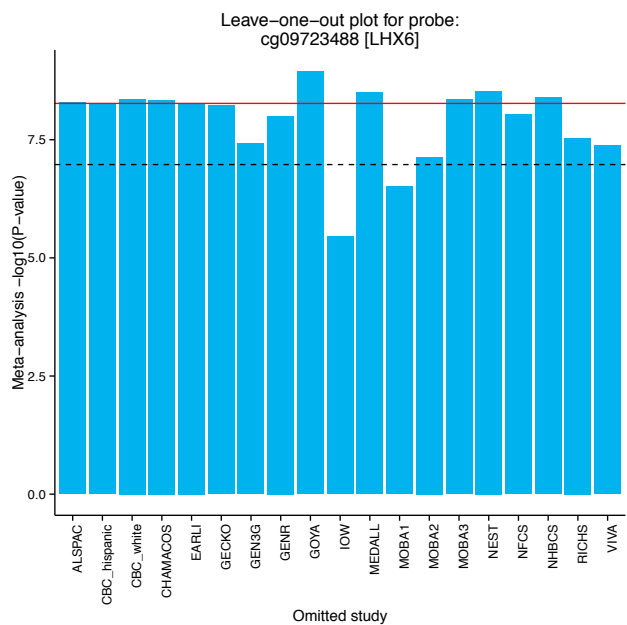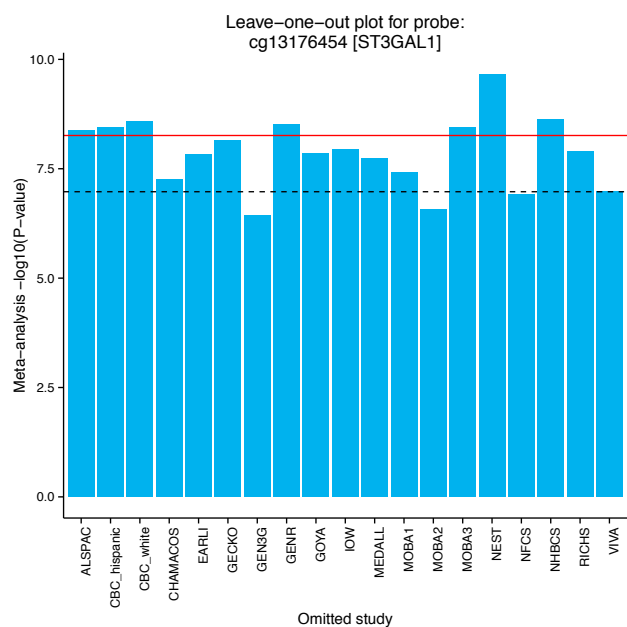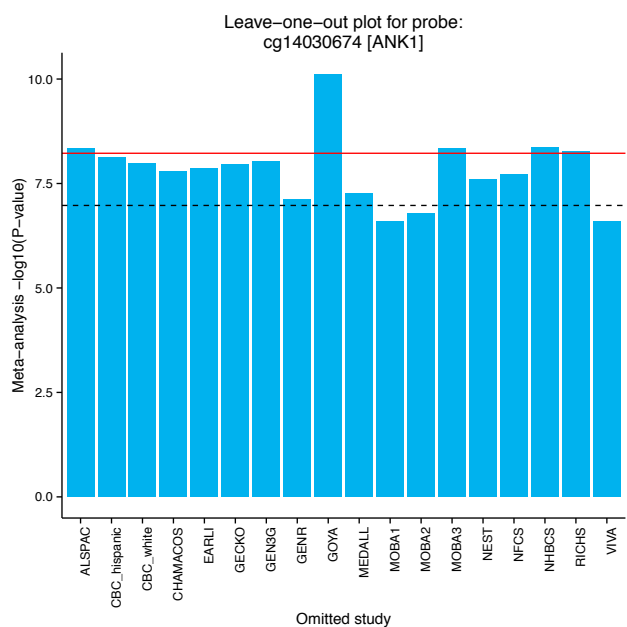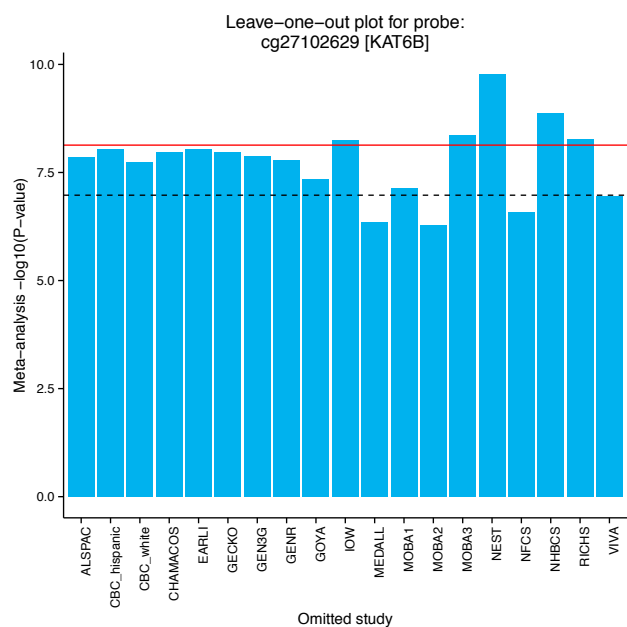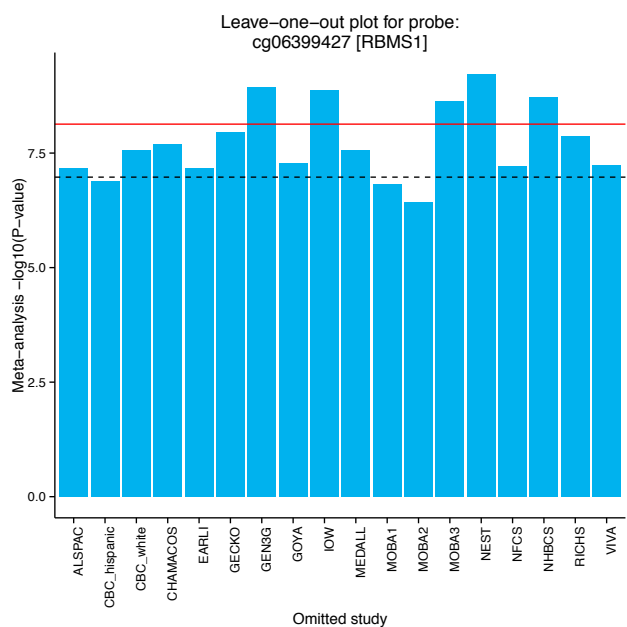

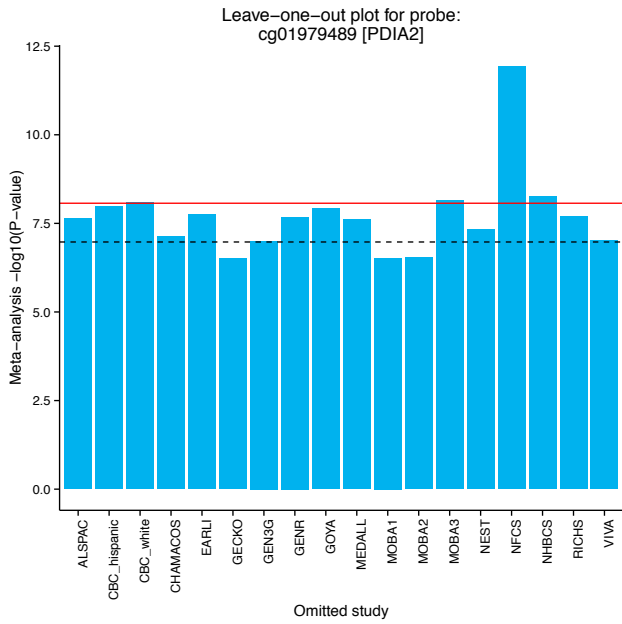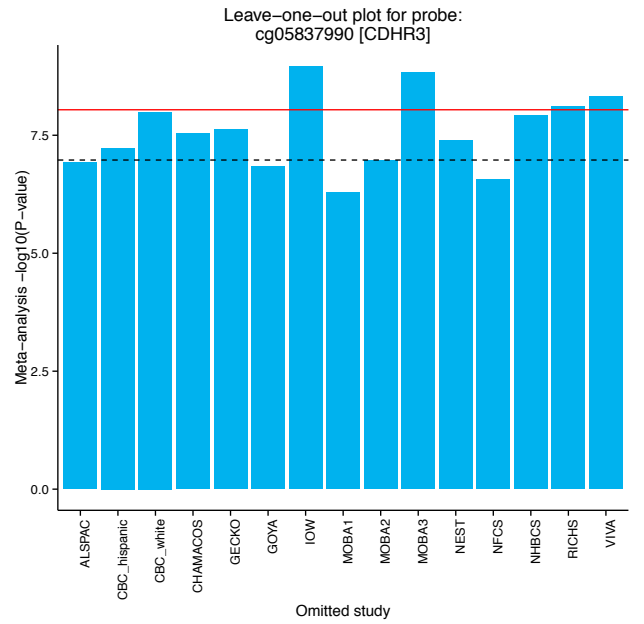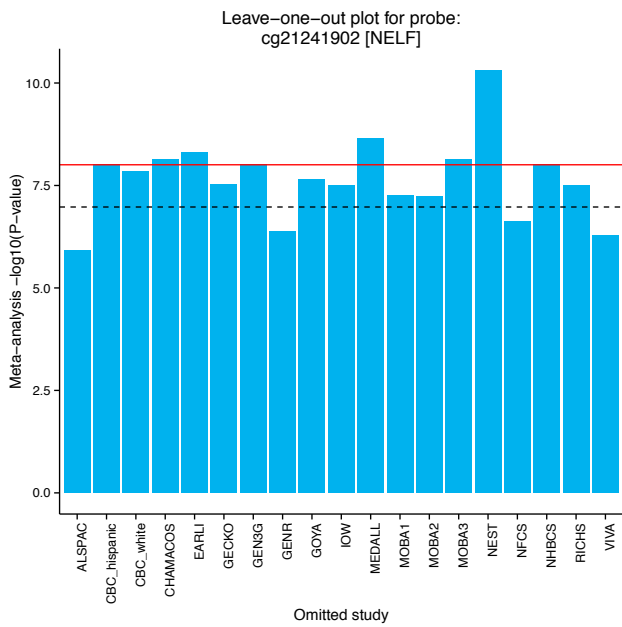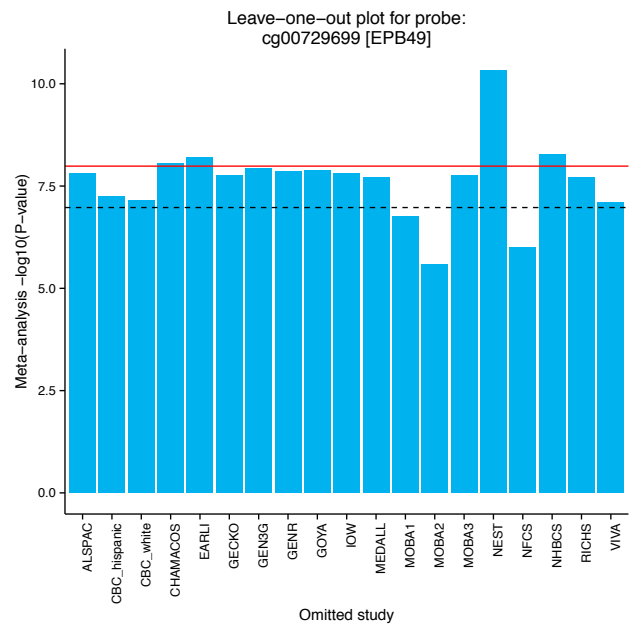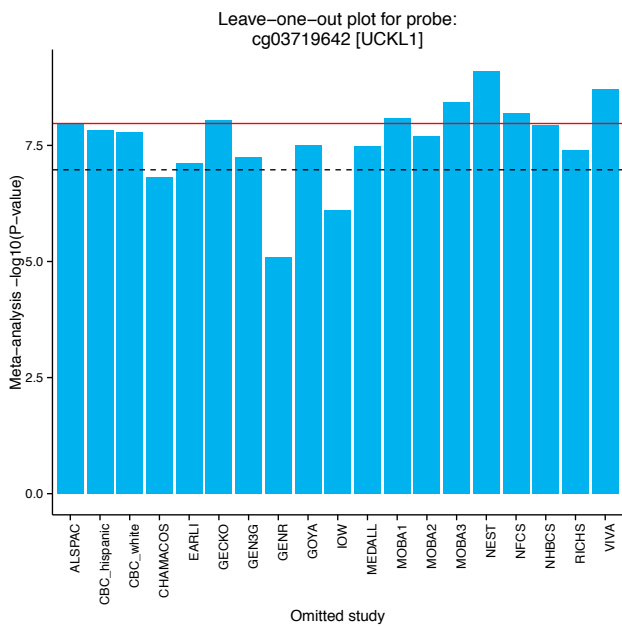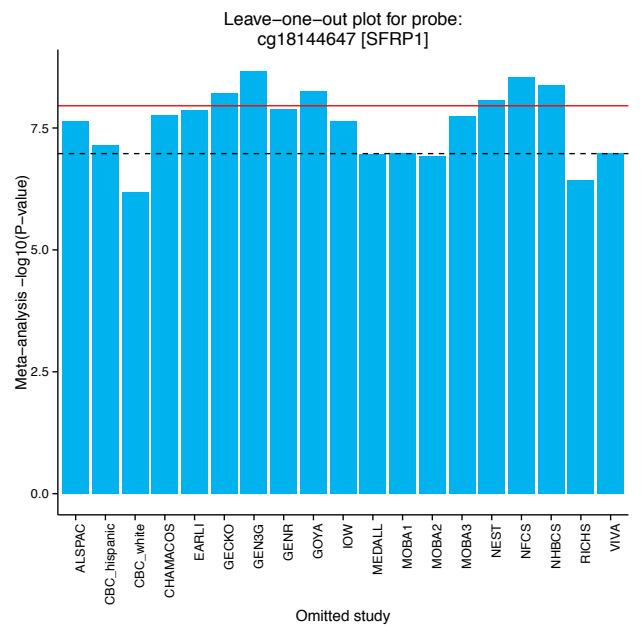

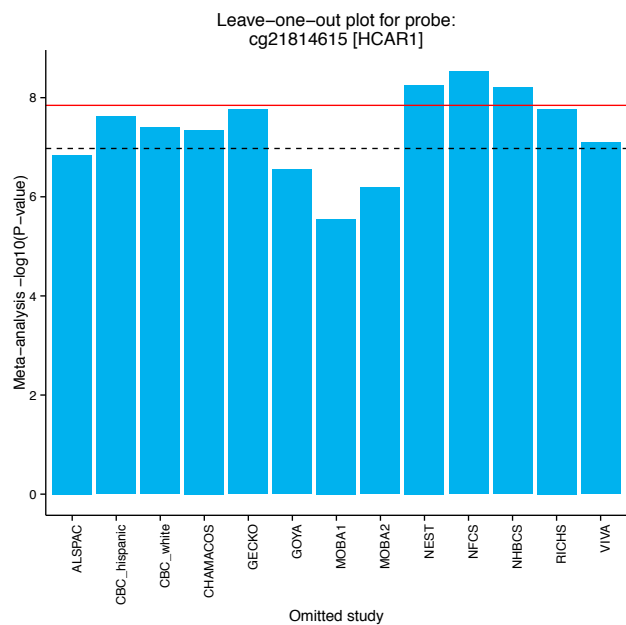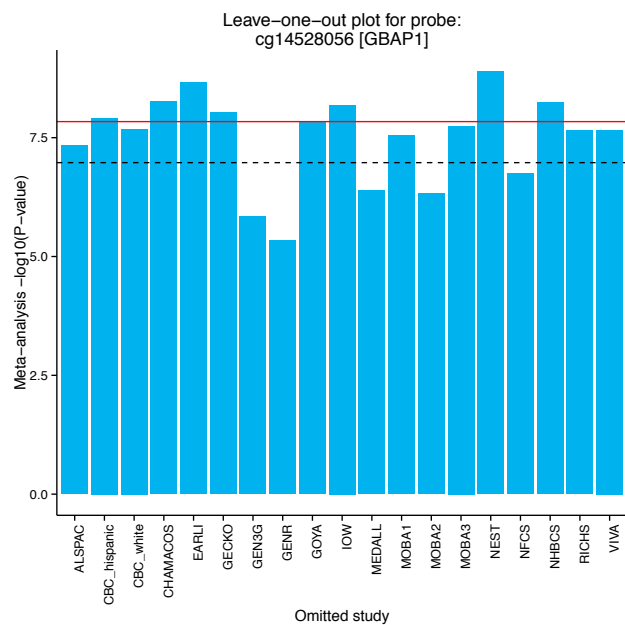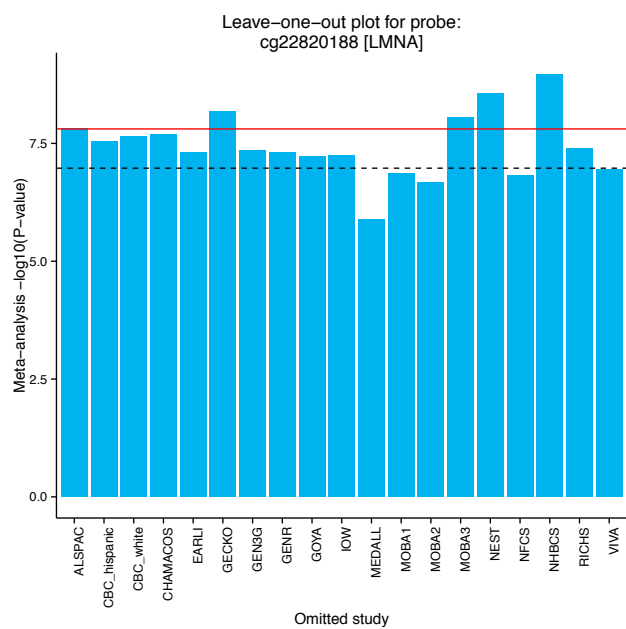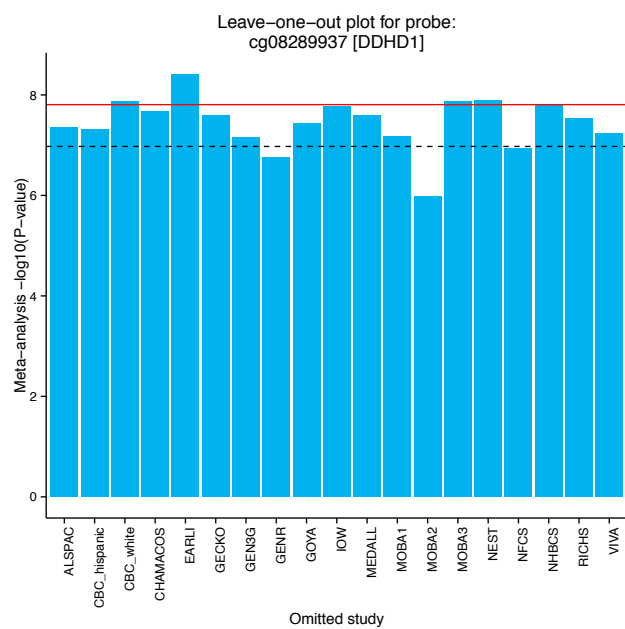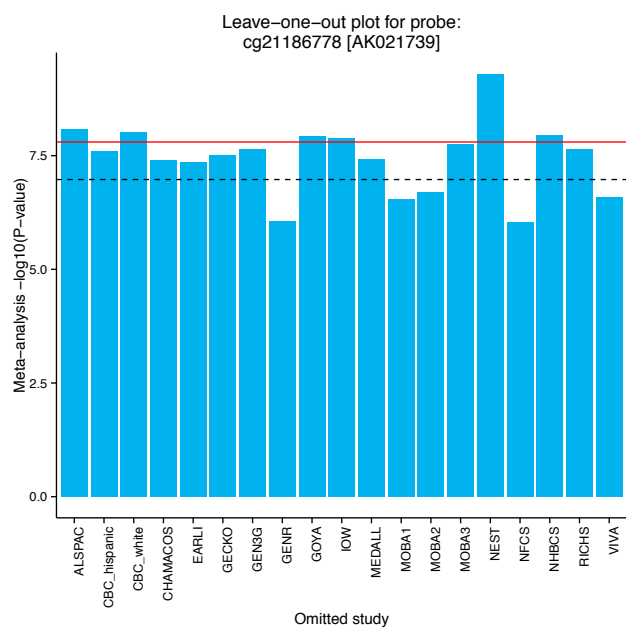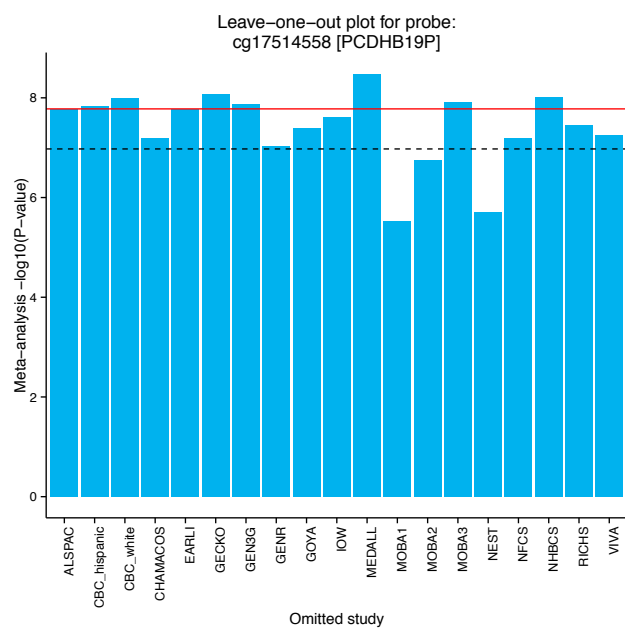

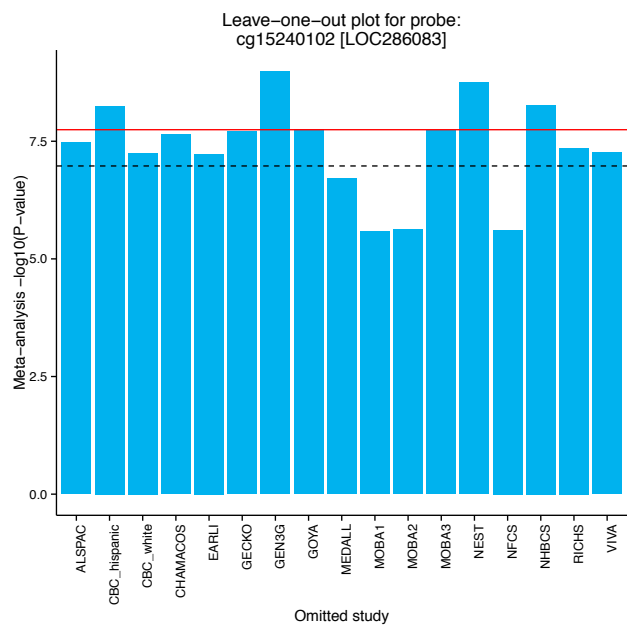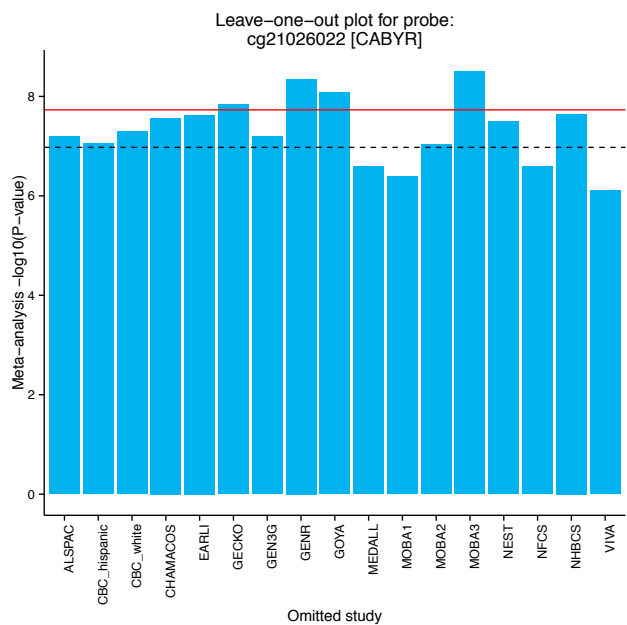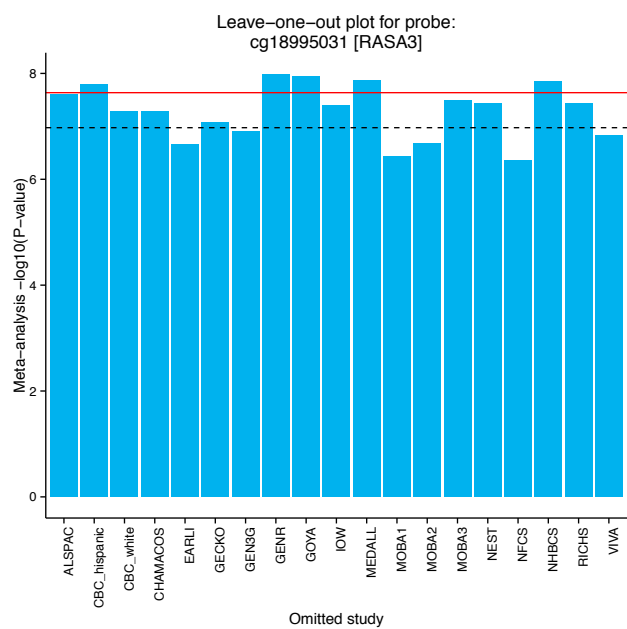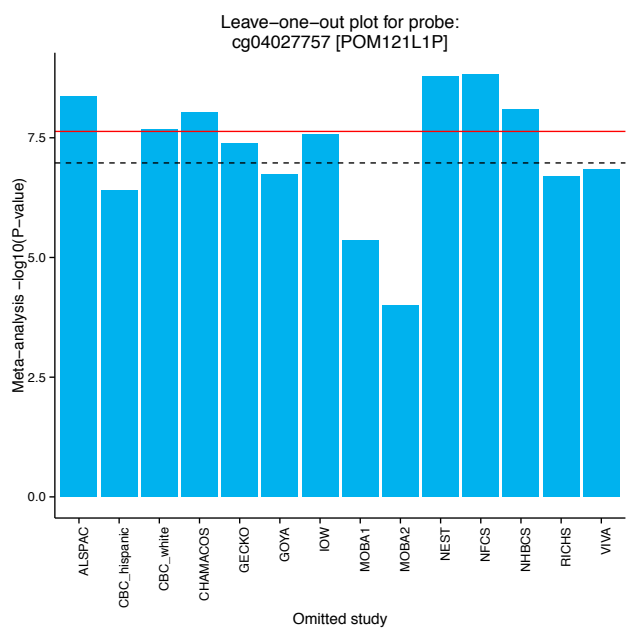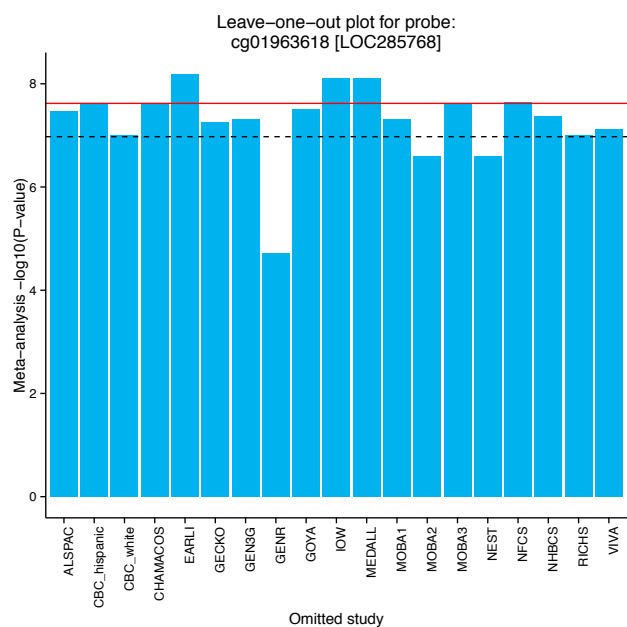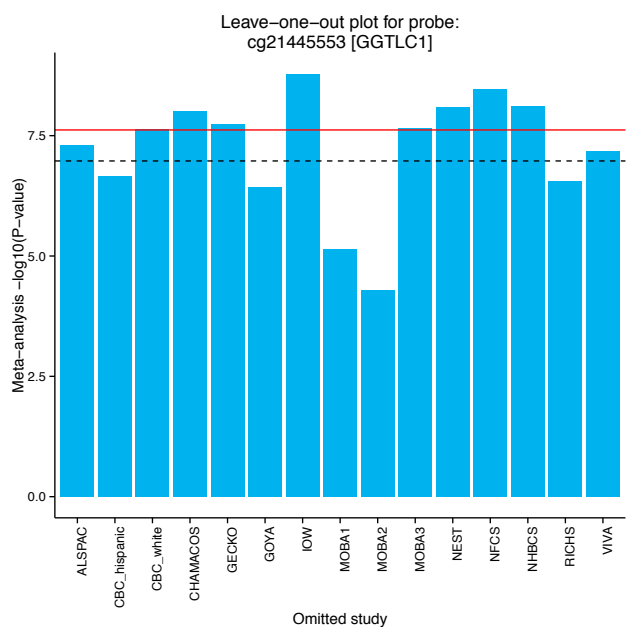

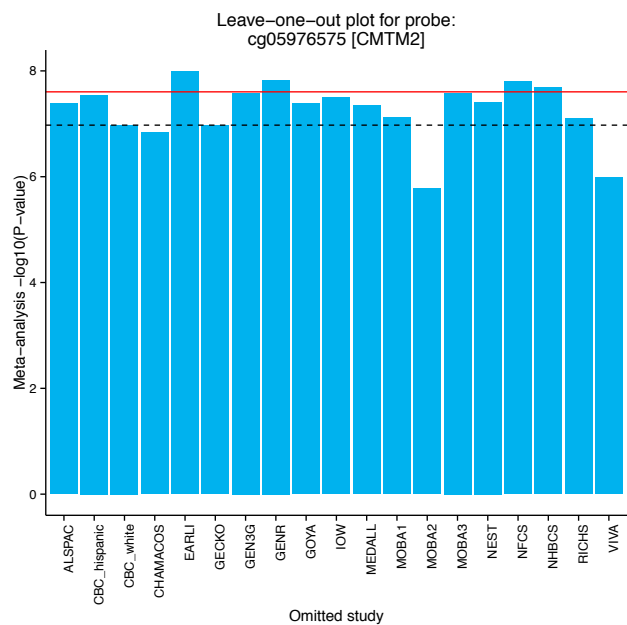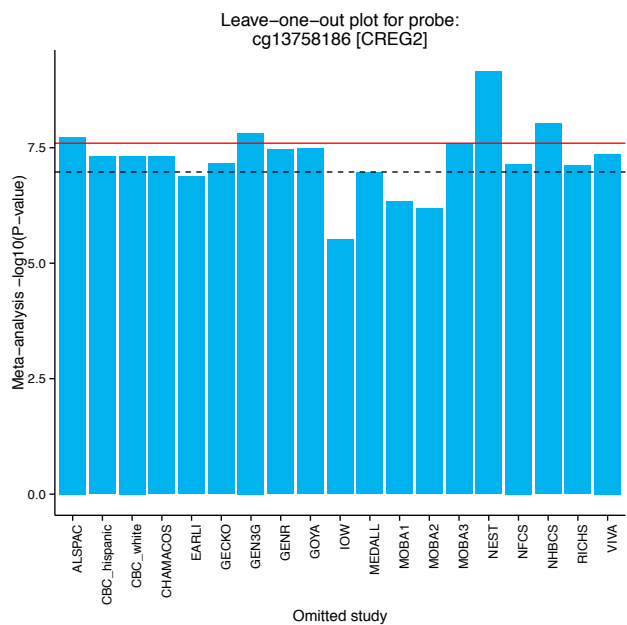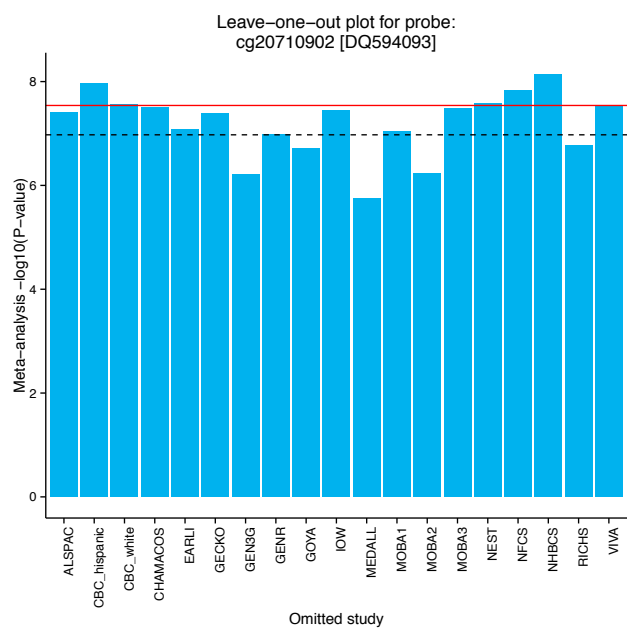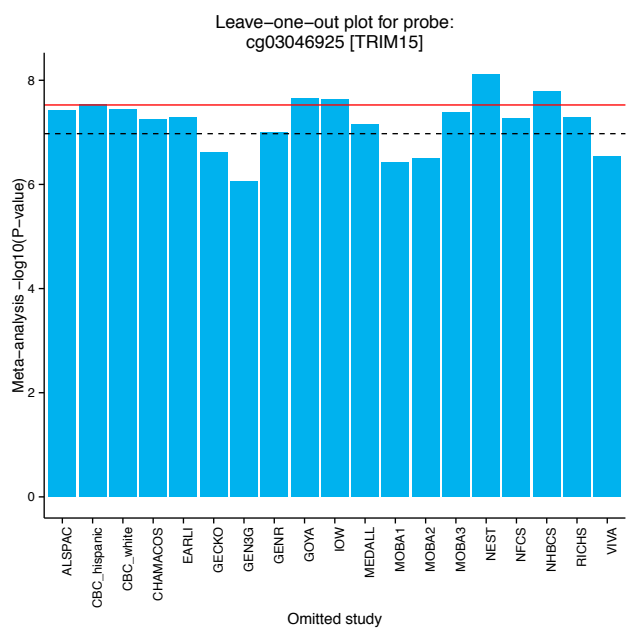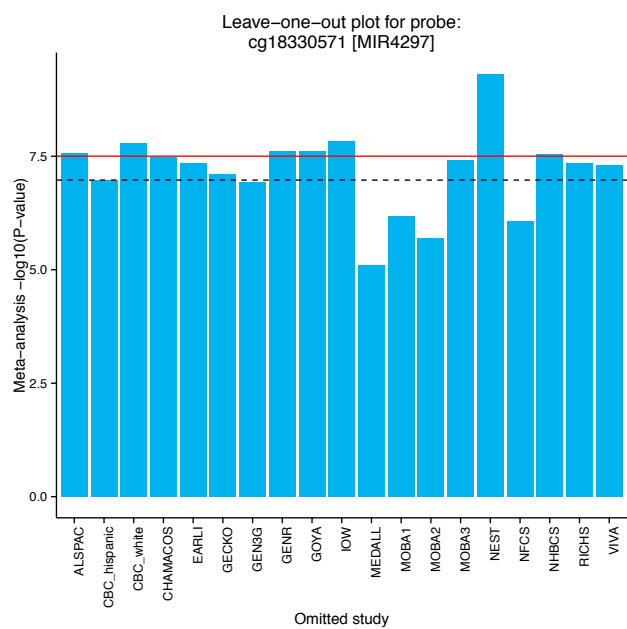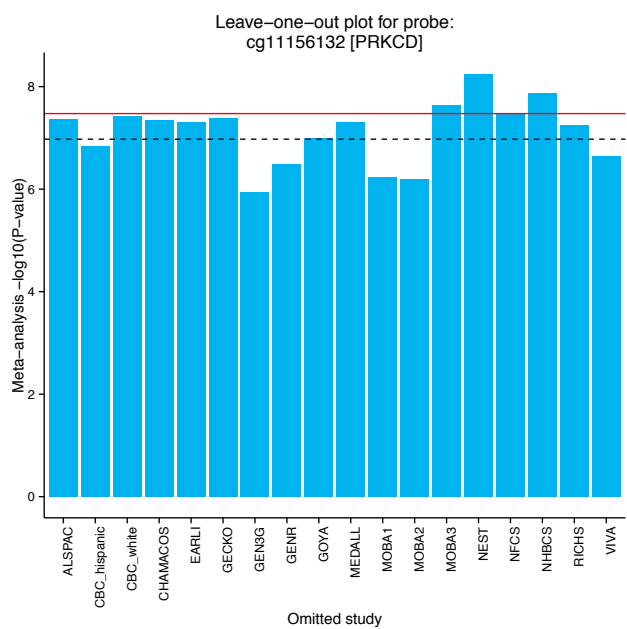



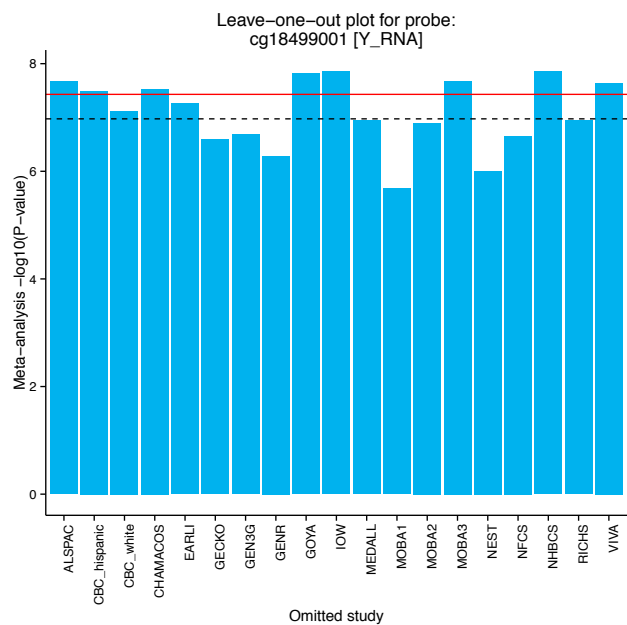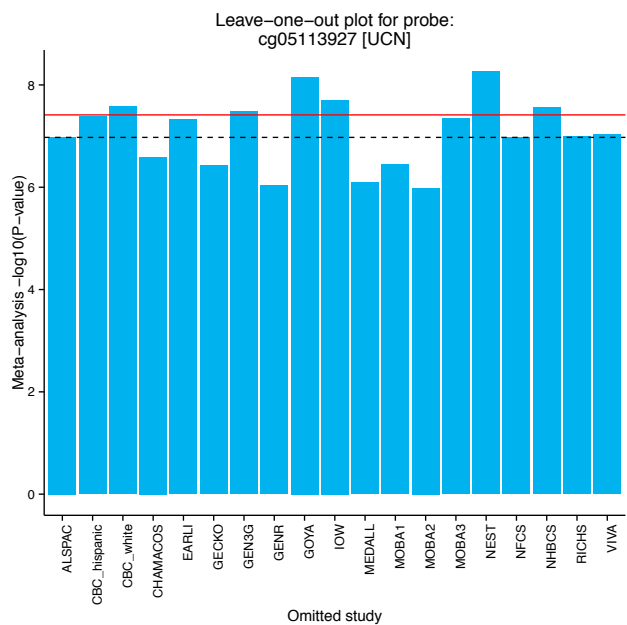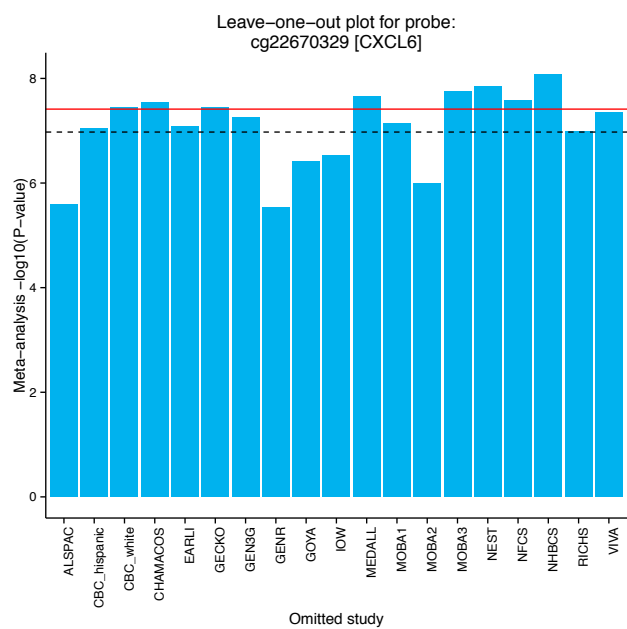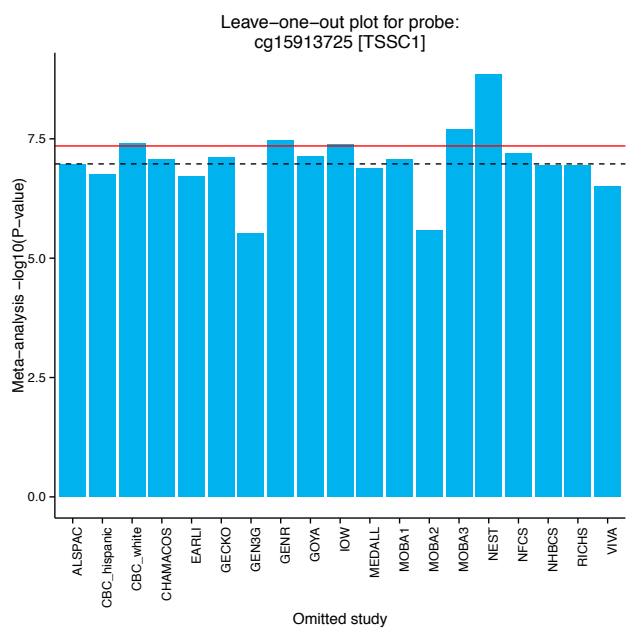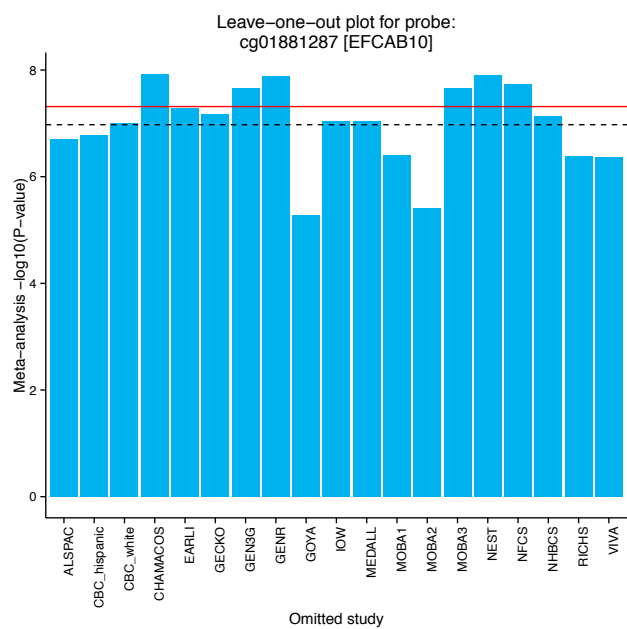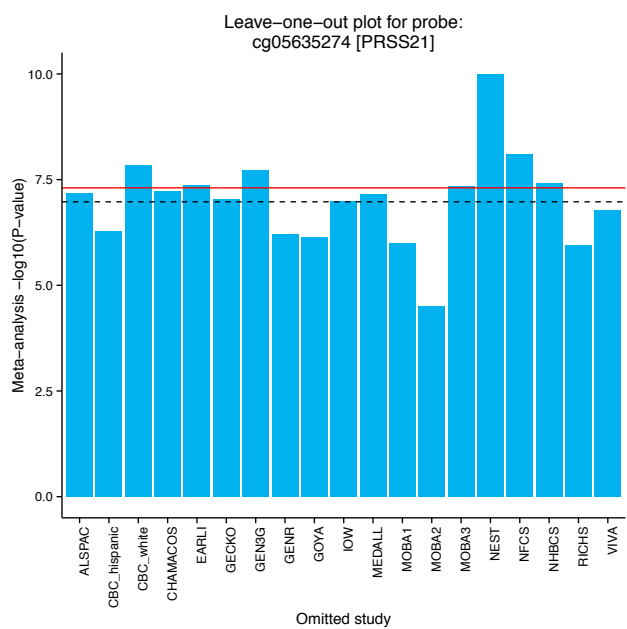

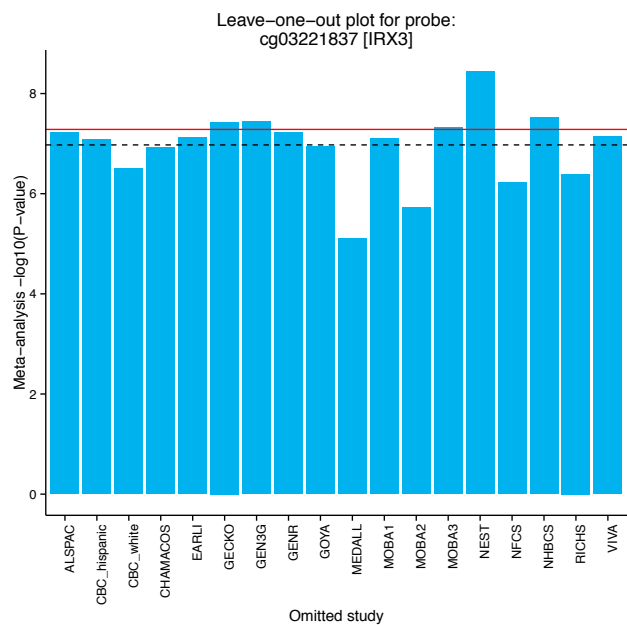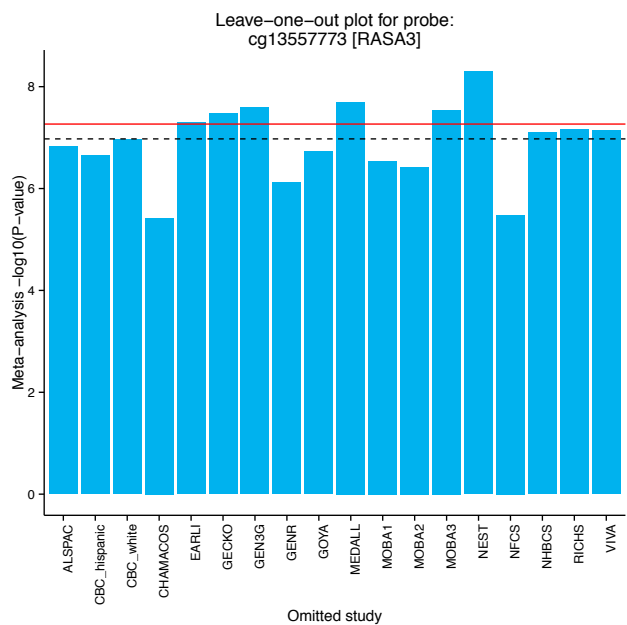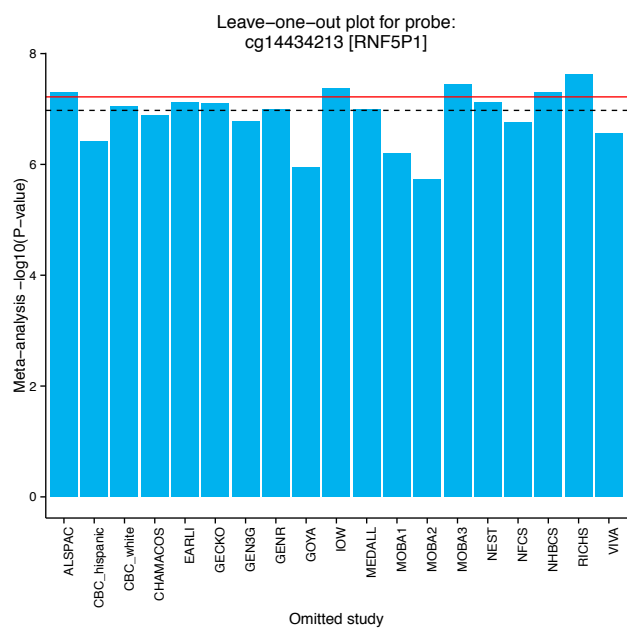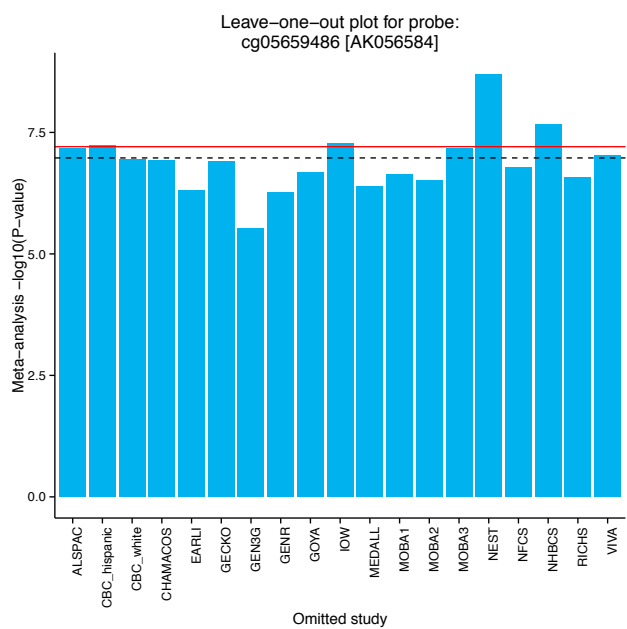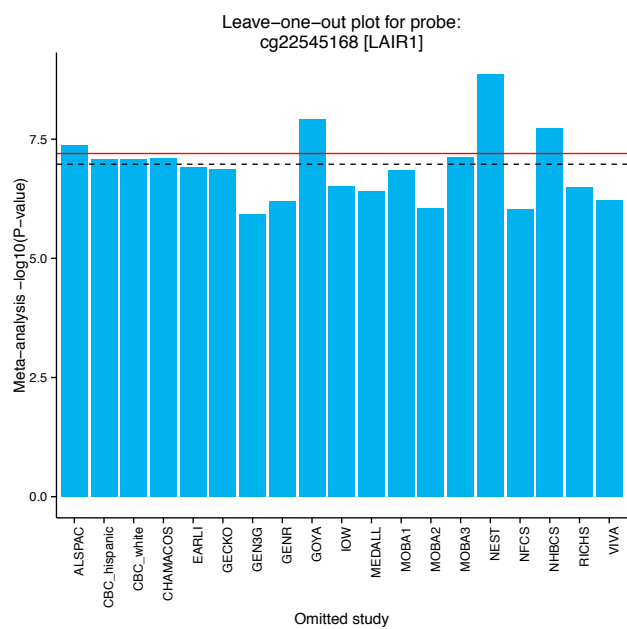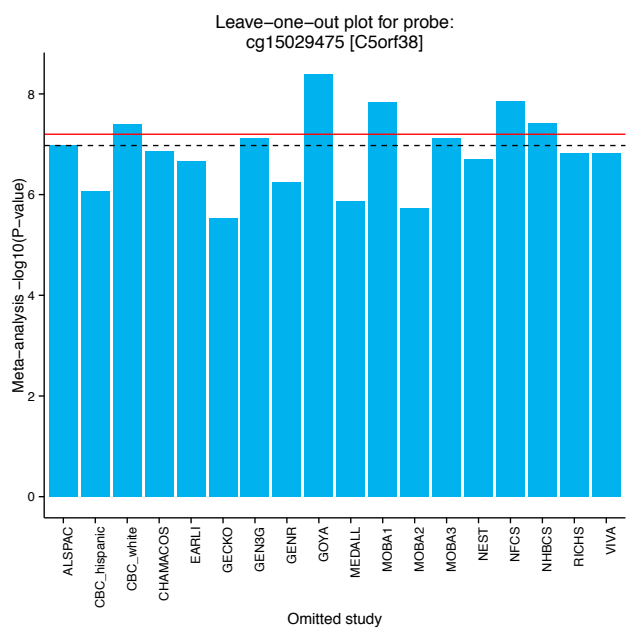

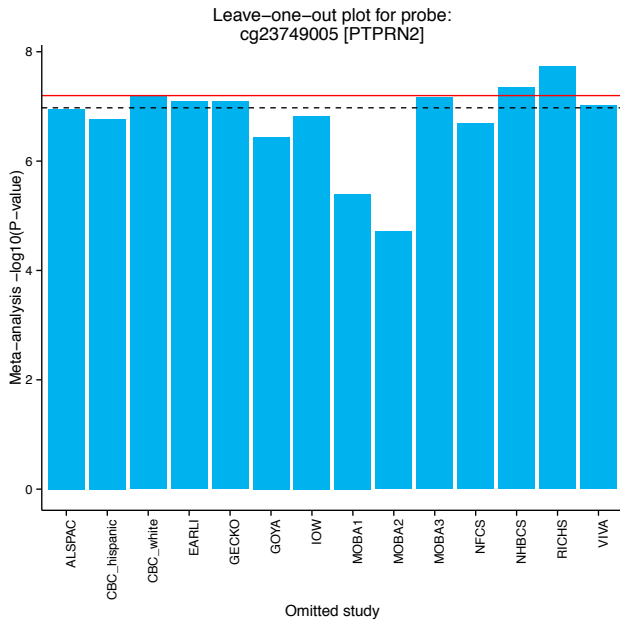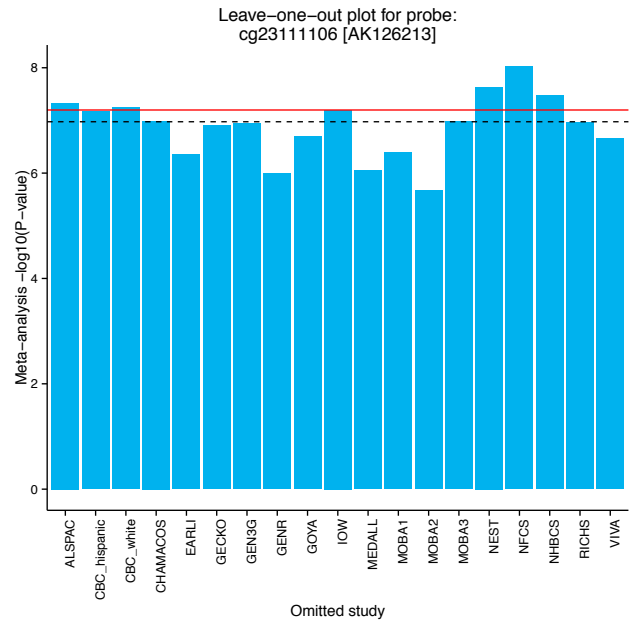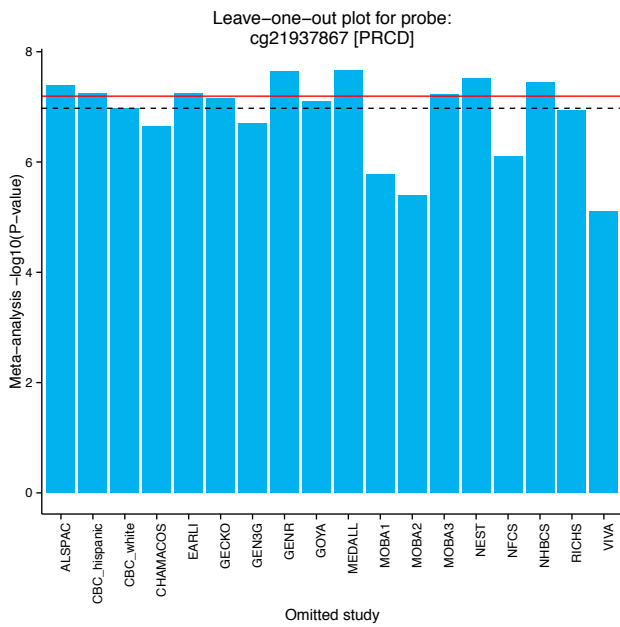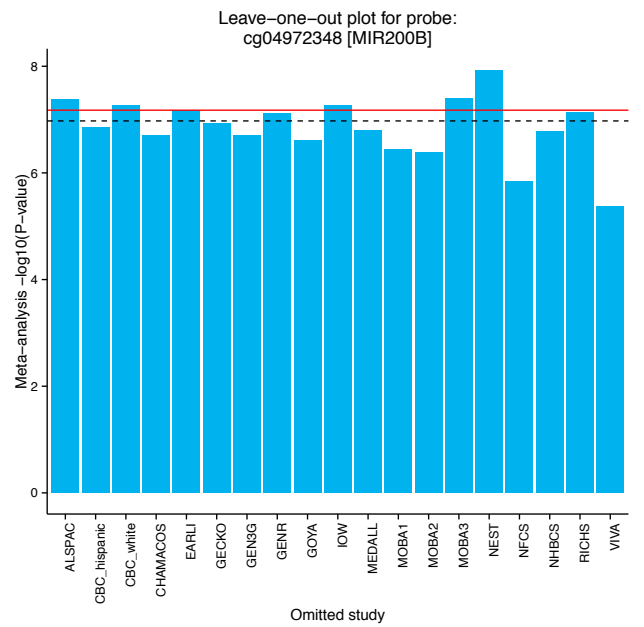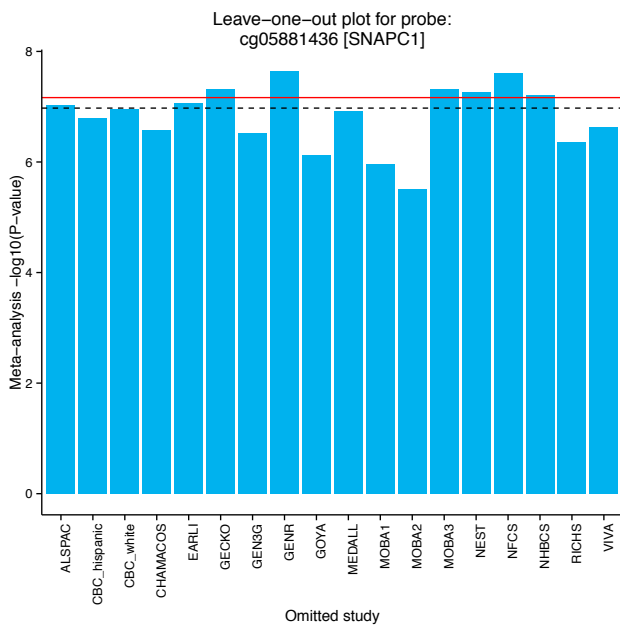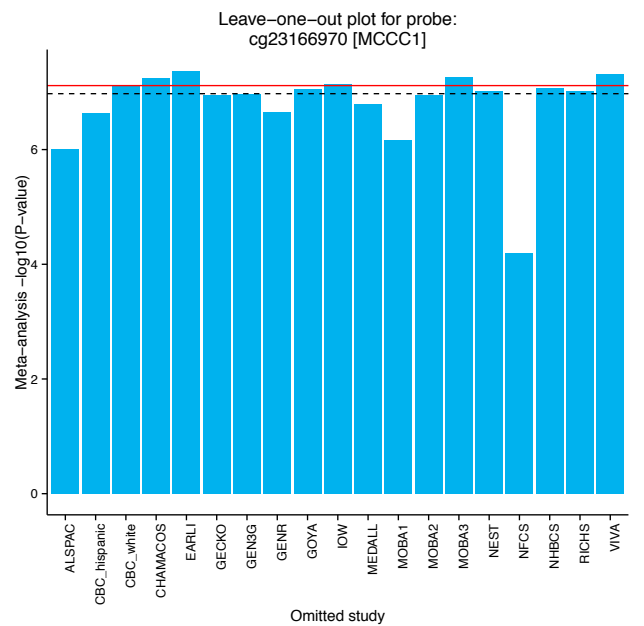

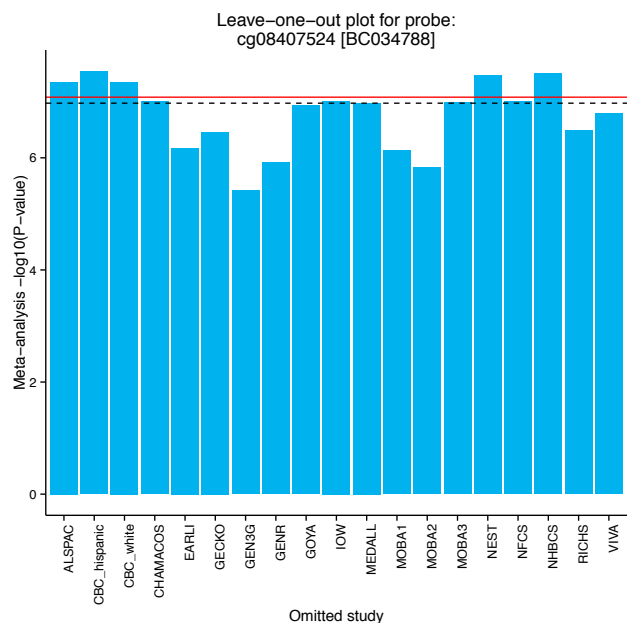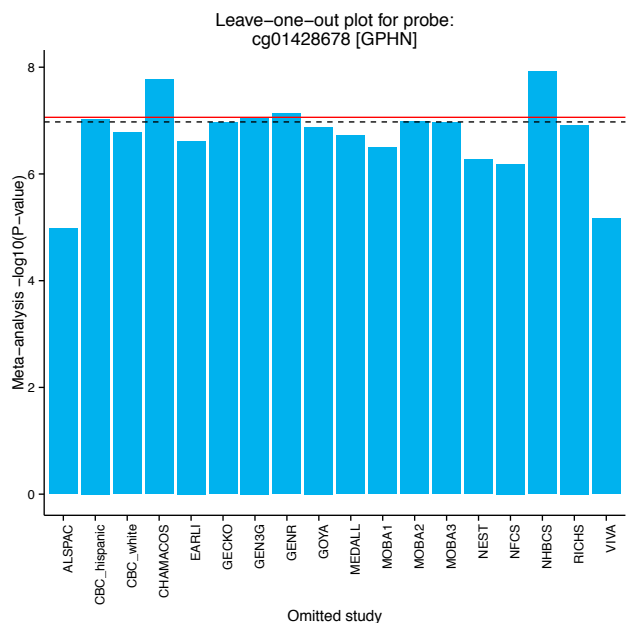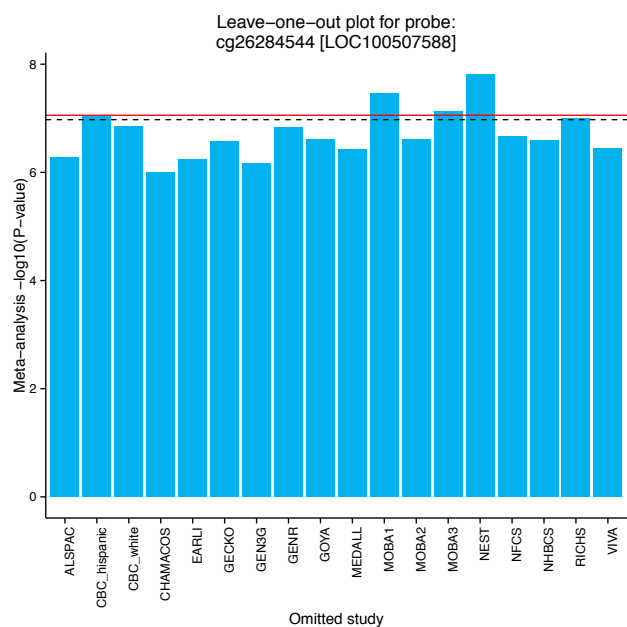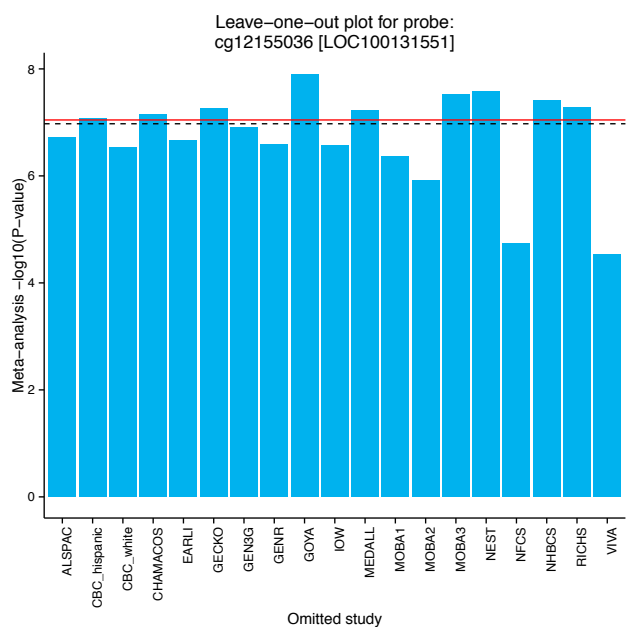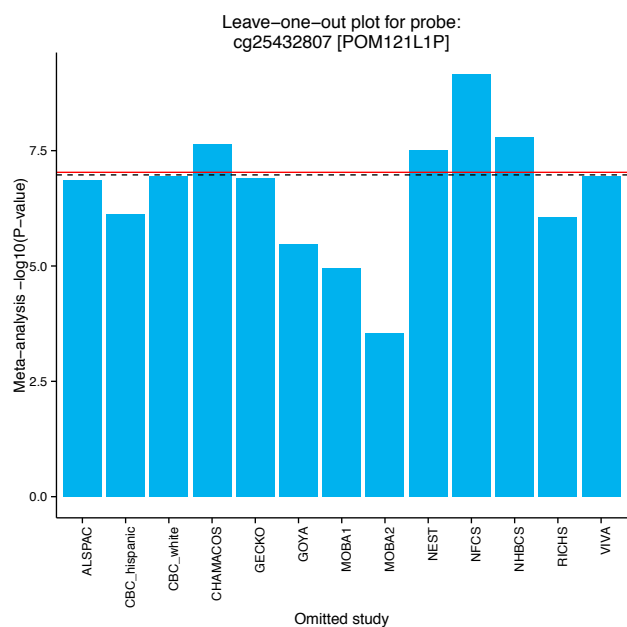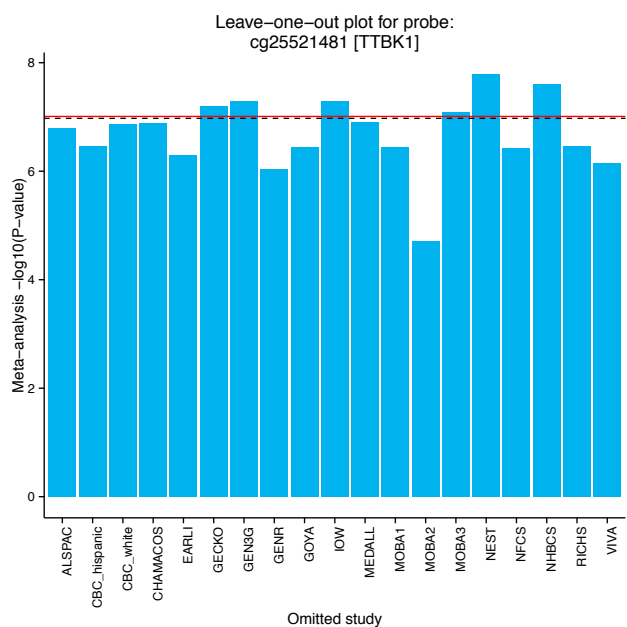

Leave-one-out plot for probe:  
cg25185429 [EGOT]

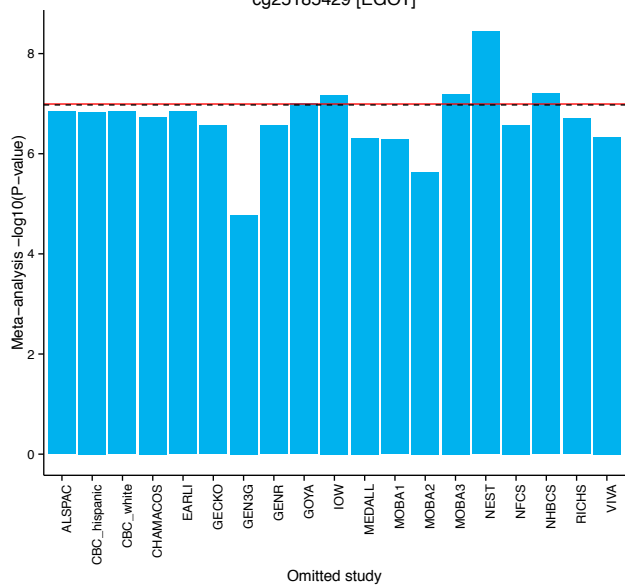

Leave-one-out plot for probe:  
cg01517690 [ZSWIM2]

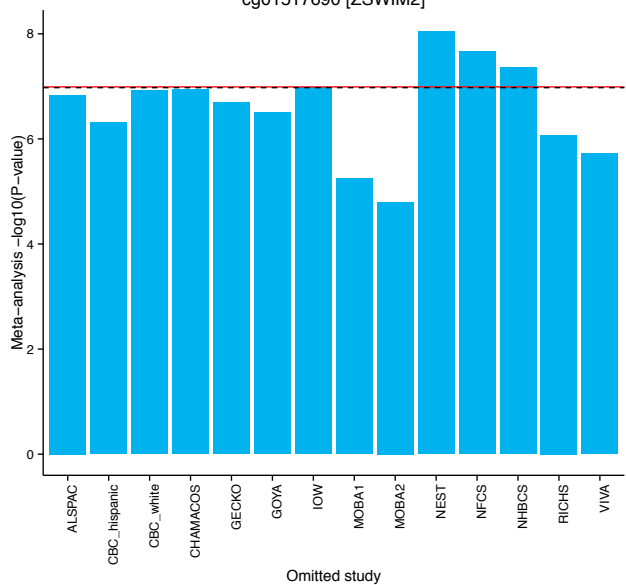

## Density plots: ALSPAC

ALSPAC  
cg12009398

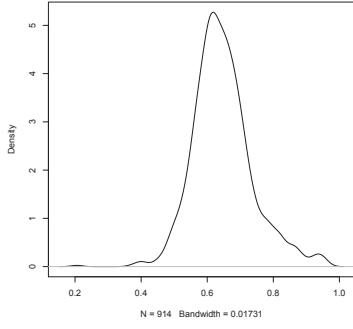

ALSPAC  
cg9285795

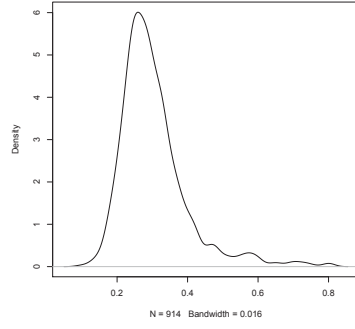

ALSPAC  
cg23080818

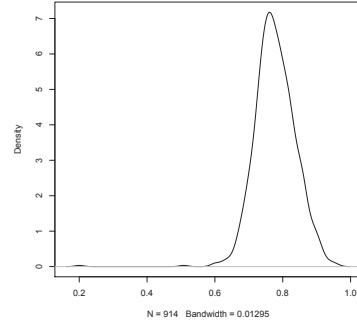

ALSPAC  
cg25213362

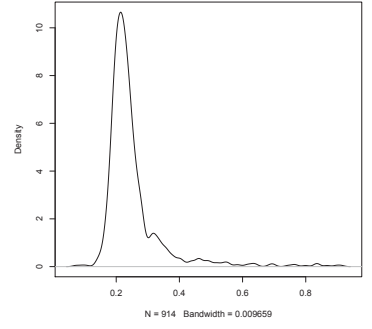

ALSPAC  
cg17782974

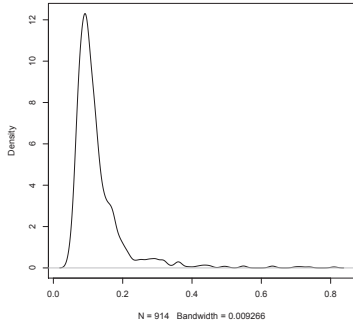

ALSPAC  
cg95086444

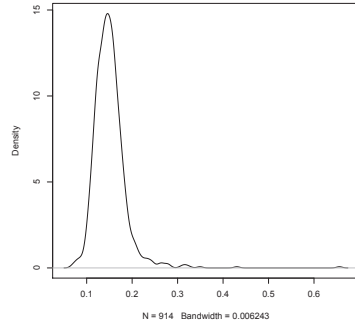

ALSPAC  
cg03258665

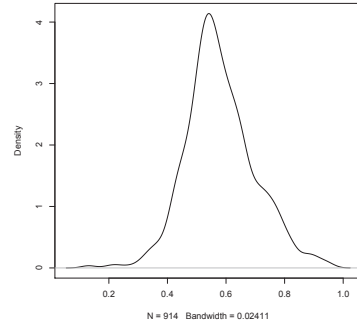

ALSPAC  
cg20065216

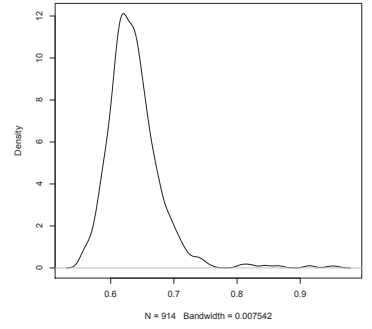

ALSPAC  
cg26434090

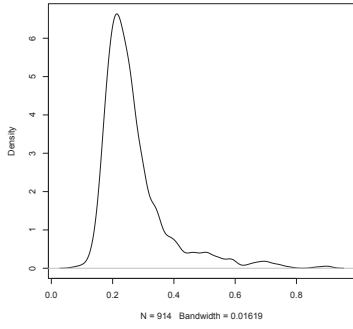

ALSPAC  
cg18268562

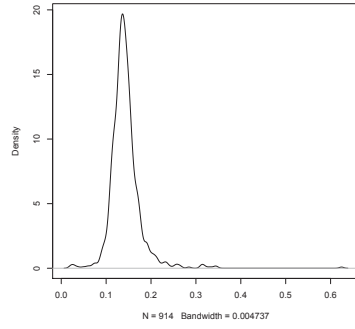

ALSPAC  
cg00285394

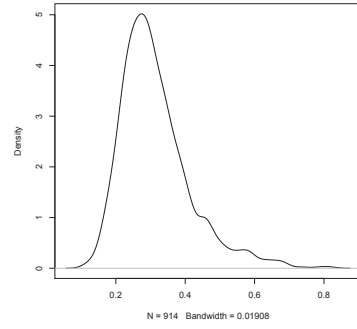

ALSPAC  
cg27179375

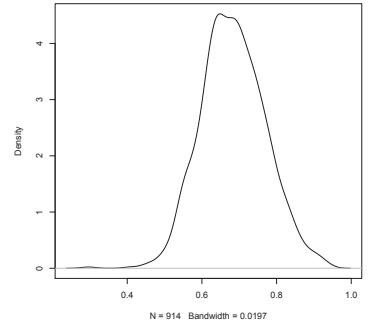

ALSPAC  
cg95586134

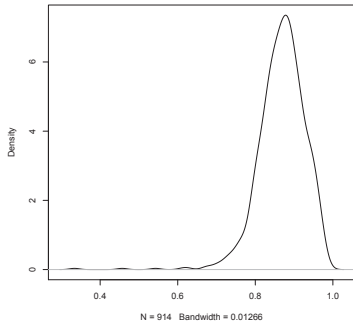

ALSPAC  
cg97357021

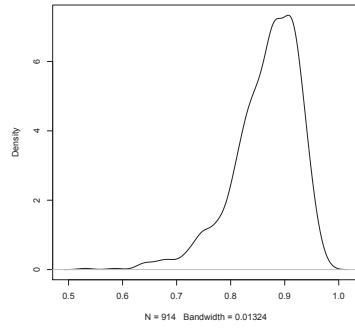

ALSPAC  
cg21778193

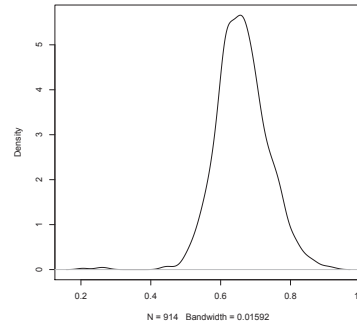

ALSPAC  
cg04836151

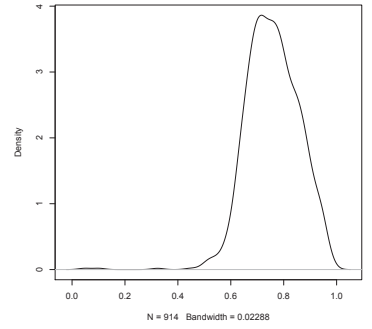

ALSPAC  
cg9243648

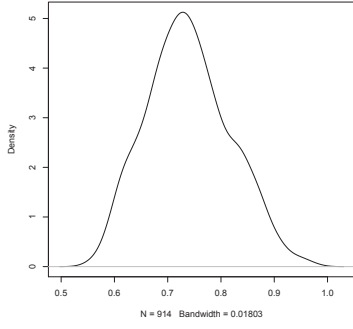

ALSPAC  
cg7822775

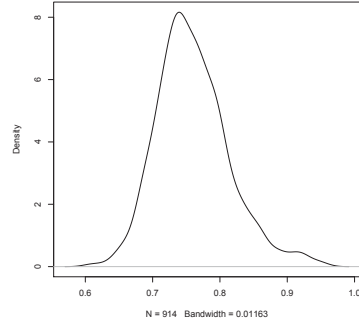

ALSPAC  
cg14906690

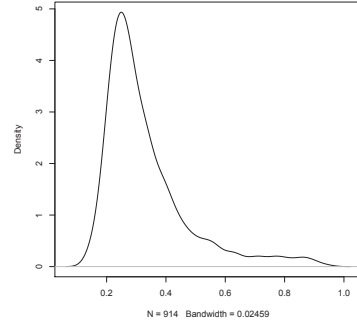

ALSPAC  
cg05309280

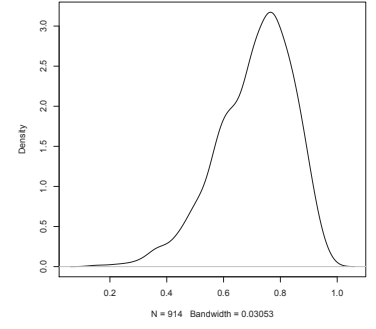

ALSPAC  
cg10635092

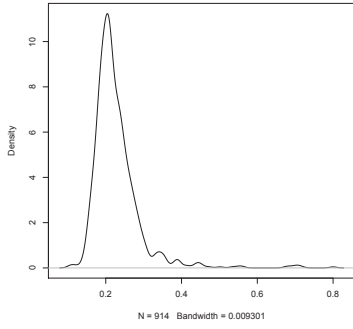

ALSPAC  
cg13403462

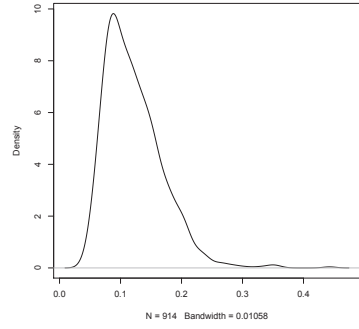

ALSPAC  
cg10187674

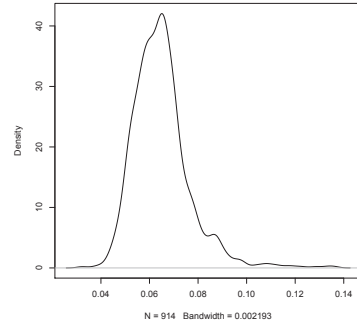

ALSPAC  
cg19762797

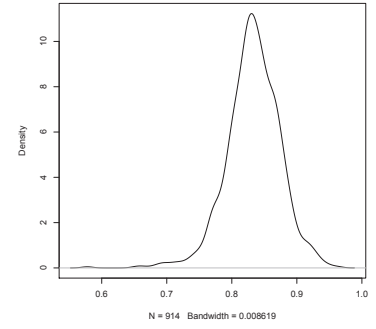

ALSPAC  
cg9230763

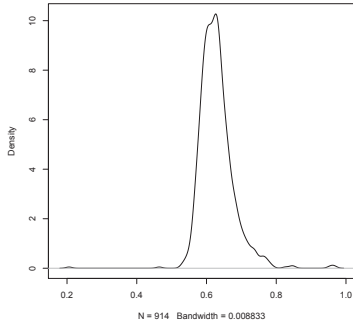

ALSPAC  
cg18156417

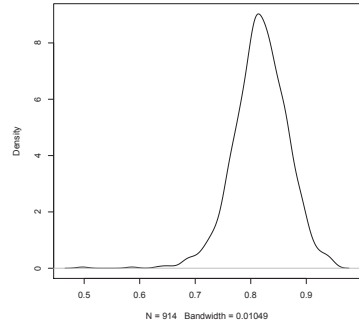

ALSPAC  
cg26220185

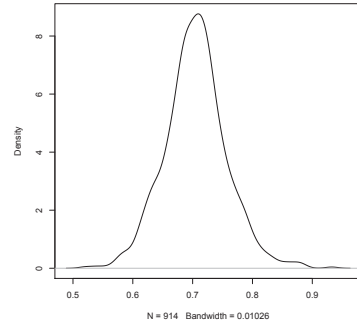

ALSPAC  
cg13540311

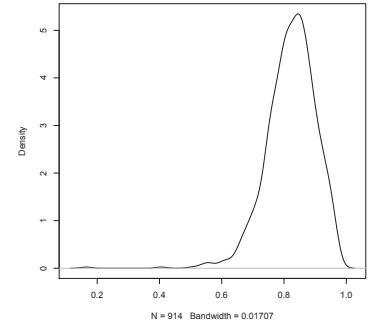

ALSPAC  
cg16877087

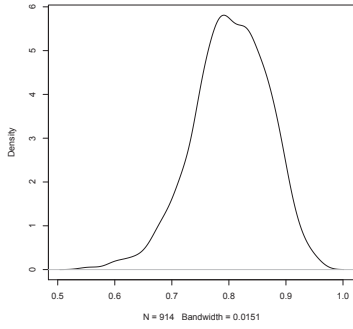

ALSPAC  
cg20594982

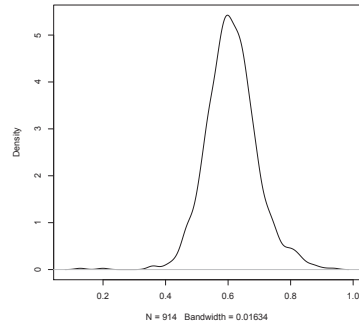

ALSPAC  
cg14660676

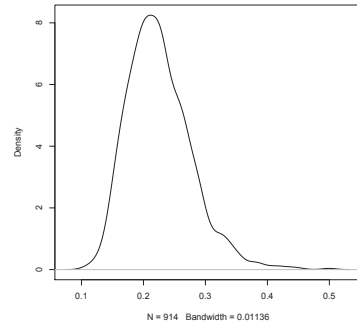

ALSPAC  
cg09723488

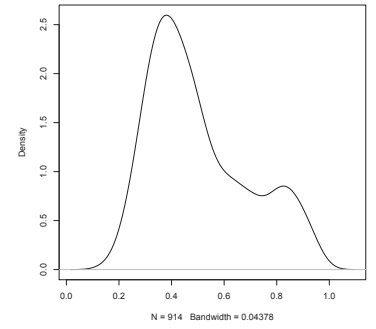



ALSPAC  
cg13176454

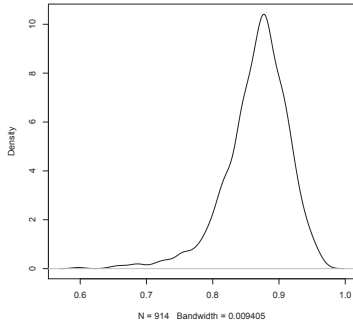

ALSPAC  
cg14030674

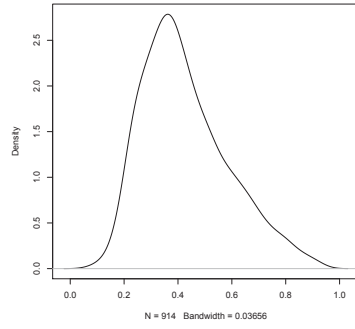

ALSPAC  
cg27102629

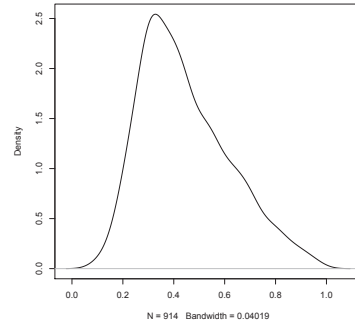

ALSPAC  
cg06399427

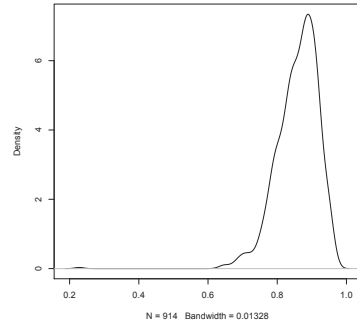

ALSPAC  
cg01979489

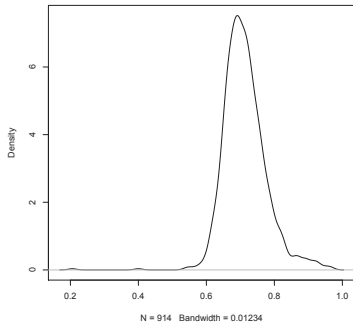

ALSPAC  
cg05837990

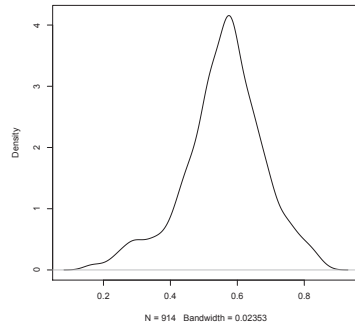

ALSPAC  
cg21241902

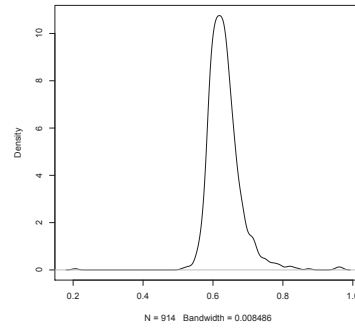

ALSPAC  
cg00729699

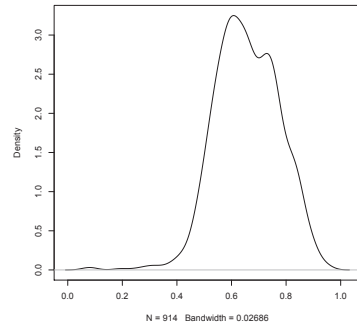

ALSPAC  
cg03719642

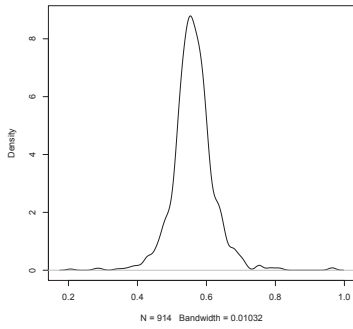

ALSPAC  
cg18144647

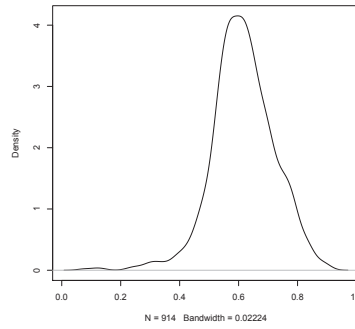

ALSPAC  
cg21814615

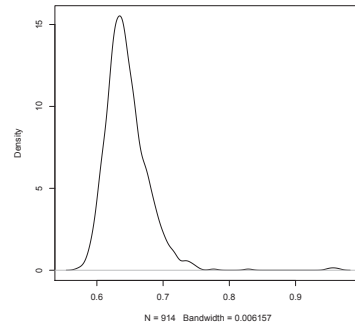

ALSPAC  
cg14528056

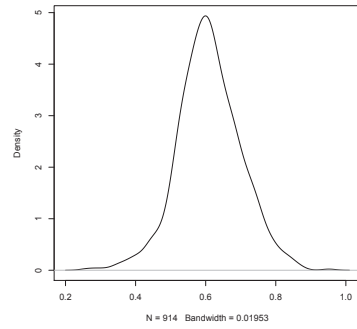

ALSPAC  
cg22620188

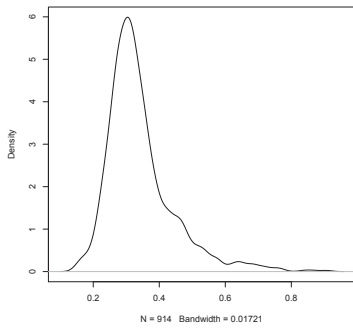

ALSPAC  
cg06289937

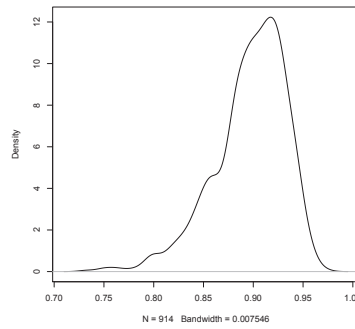

ALSPAC  
cg21186778

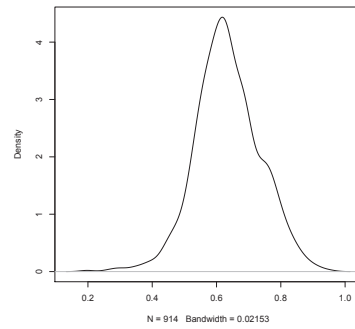

ALSPAC  
cg17514558

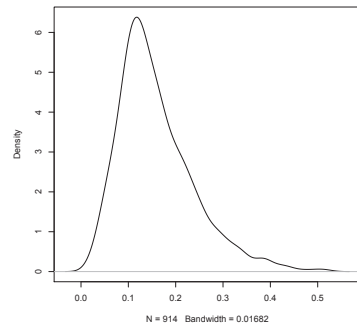

ALSPAC  
cg15240102

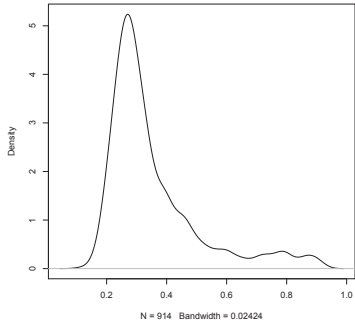

ALSPAC  
cg21026022

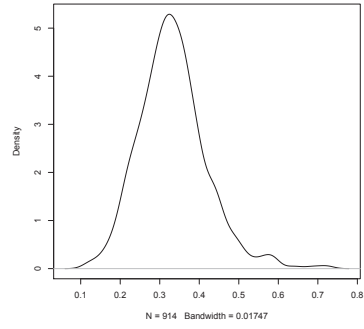

ALSPAC  
cg18995031

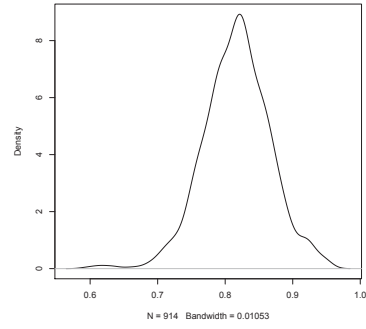

ALSPAC  
cg04027757

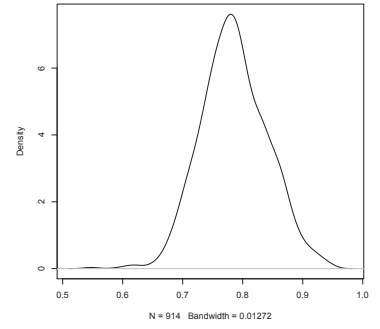

ALSPAC  
cg01963618

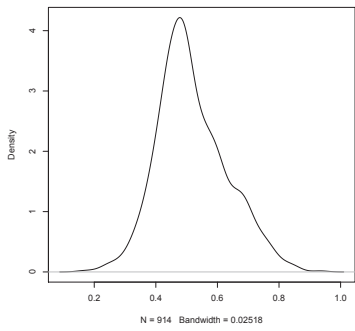

ALSPAC  
cg21445553

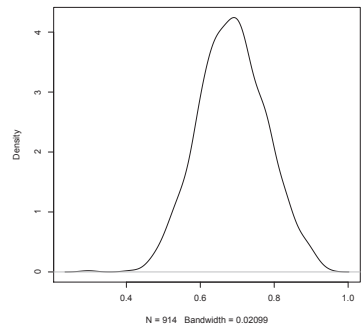

ALSPAC  
cg05976575

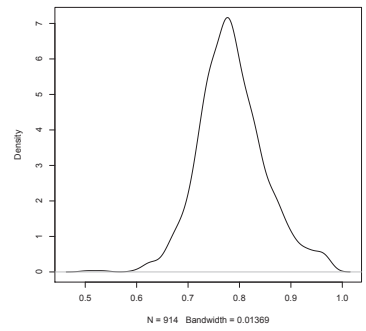

ALSPAC  
cg13758186

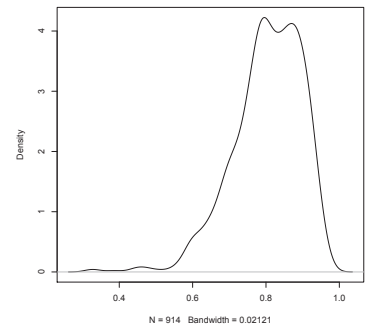

ALSPAC  
cg20710902

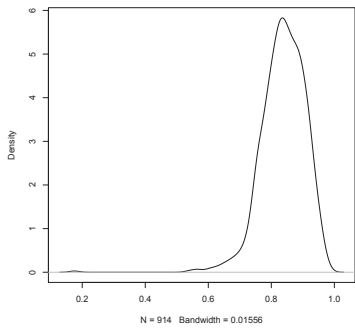

ALSPAC  
cg03046925

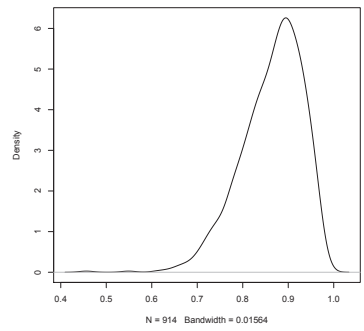

ALSPAC  
cg18330571

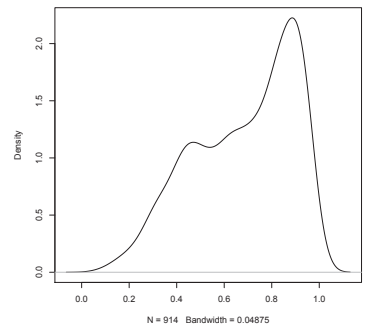

ALSPAC  
cg11156132

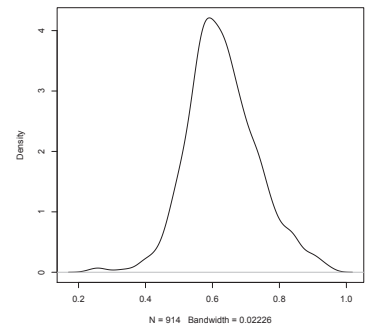

ALSPAC  
cg18499001

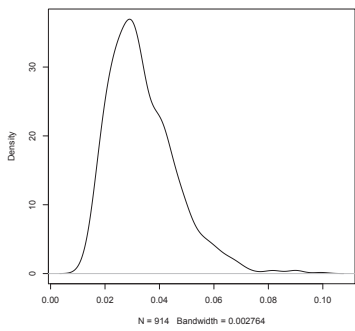

ALSPAC  
cg05113927

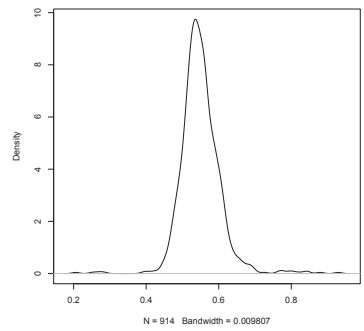

ALSPAC  
cg22670329

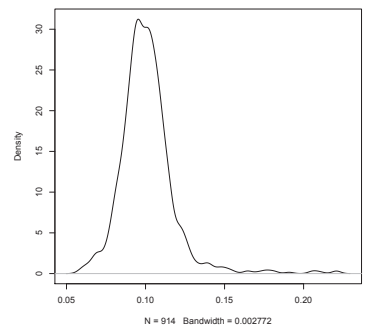

ALSPAC  
cg15913725

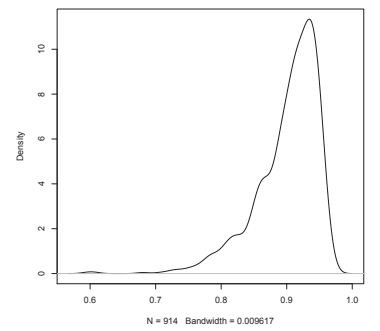

ALSPAC  
cg01881287

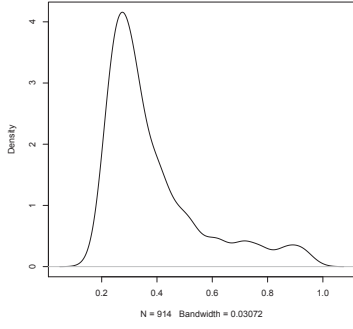

ALSPAC  
cg05635274

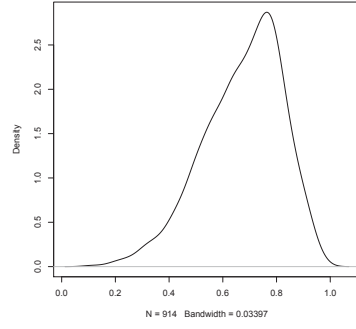

ALSPAC  
cg03221837

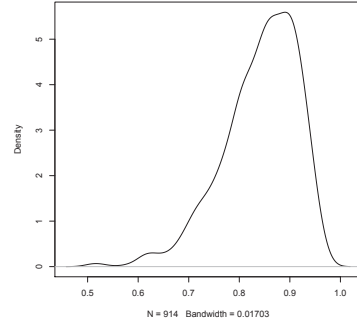

ALSPAC  
cg13557773

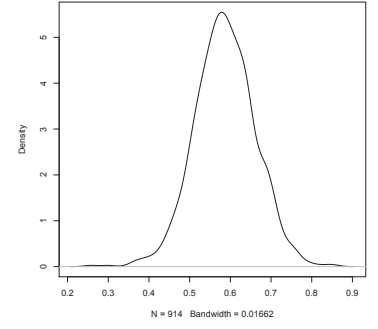

ALSPAC  
cg14434213

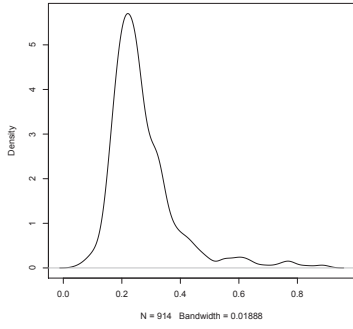

ALSPAC  
cg05659486

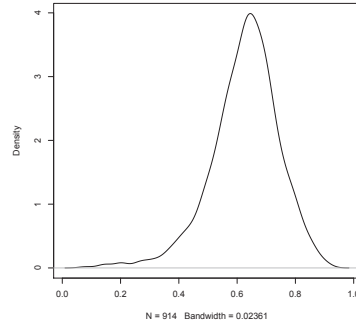

ALSPAC  
cg22545168

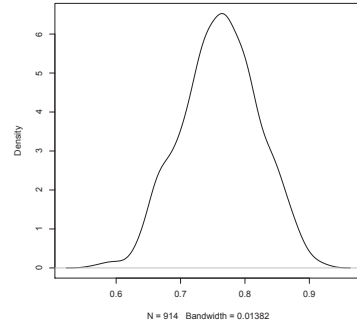

ALSPAC  
cg15029475

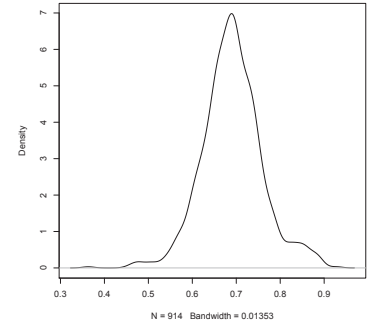

ALSPAC  
cg23749005

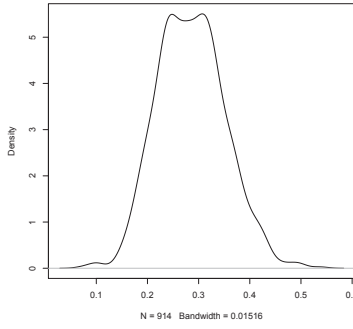

ALSPAC  
cg23111106

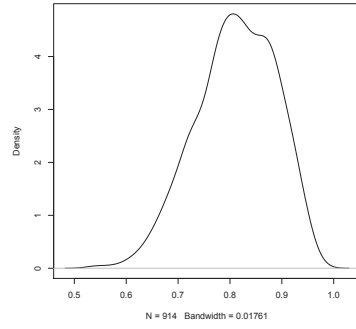

ALSPAC  
cg21937867

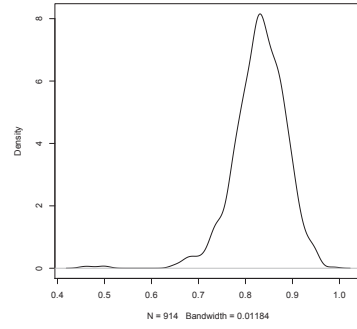

ALSPAC  
cg04972348

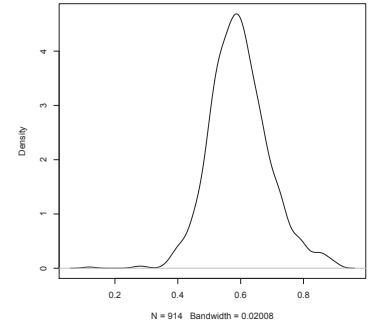

ALSPAC  
cg05881436

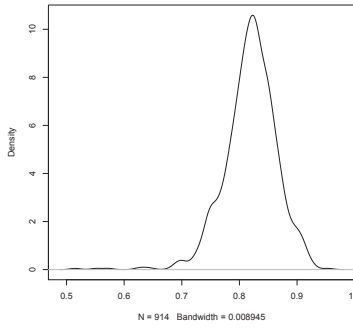

ALSPAC  
cg23166970

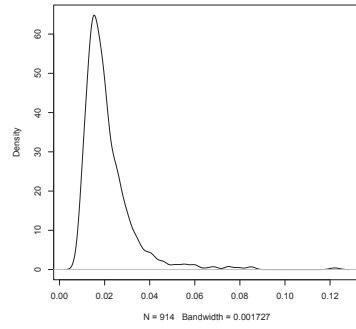

ALSPAC  
cg06407524

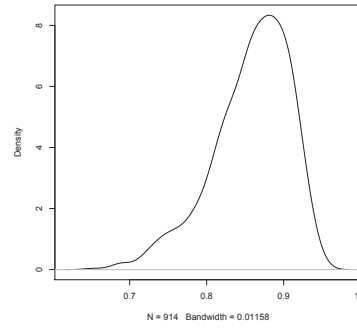

ALSPAC  
cg01428678

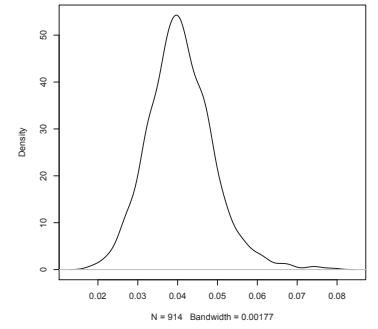

ALSPAC  
cg26284544

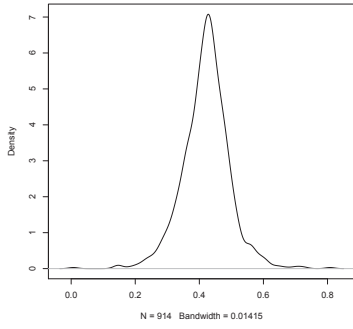

ALSPAC  
cg12155036

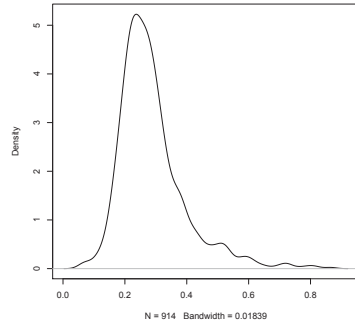

ALSPAC  
cg25432807

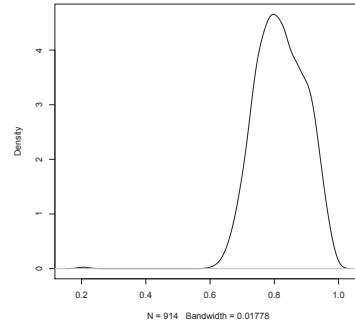

ALSPAC  
cg25521481

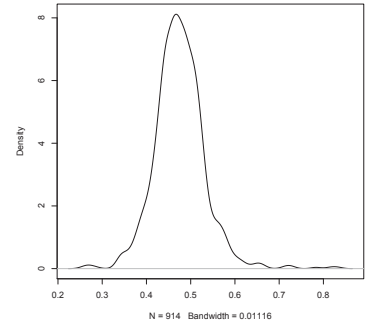

ALSPAC  
cg25185429

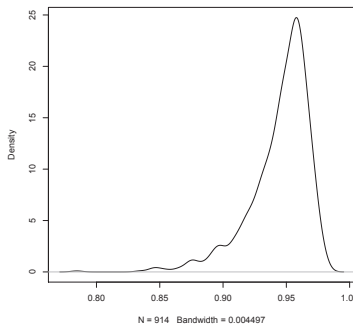

ALSPAC  
cg01517690

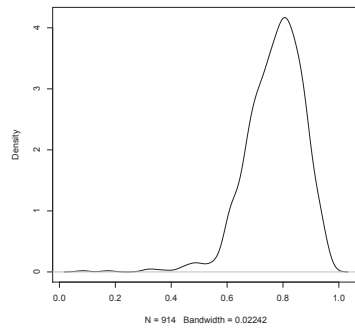

Density plots: GOYA

GOYA  
cg12009398

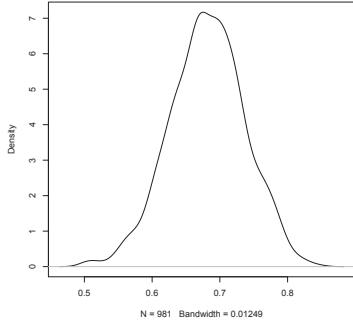

GOYA  
cg09285795

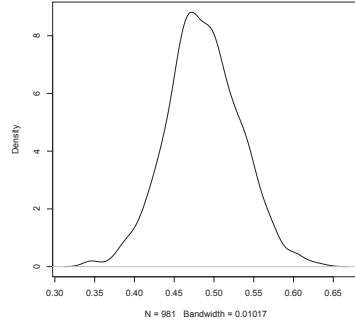

GOYA  
cg23080818

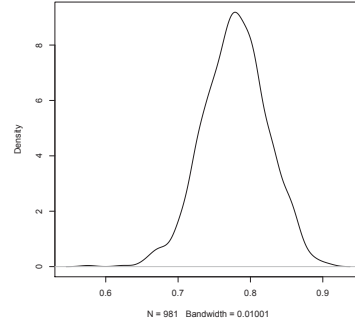

GOYA  
cg25213362

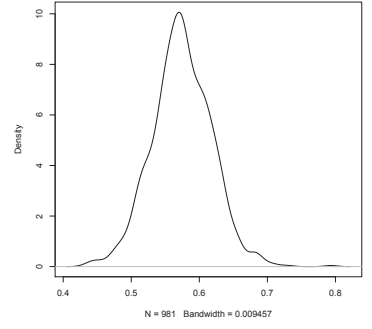

GOYA  
cg17782974

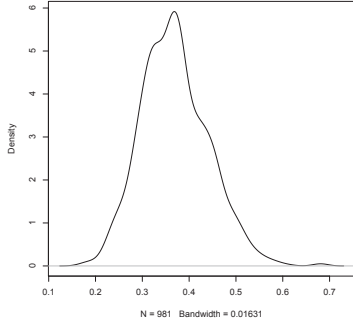

GOYA  
cg05086444

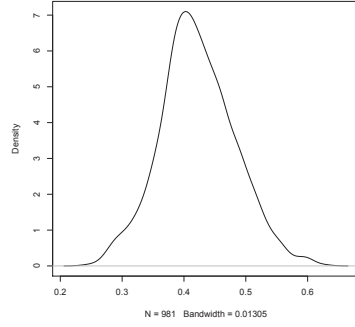

GOYA  
cg03258665

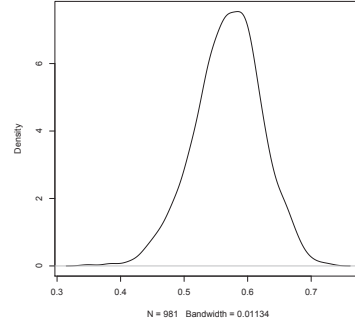

GOYA  
cg20065216

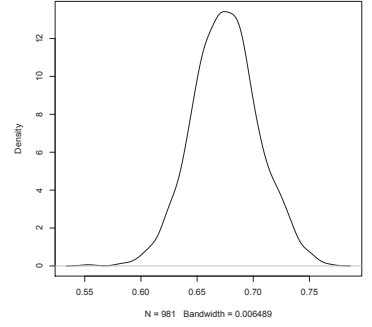

GOYA  
cg26434090

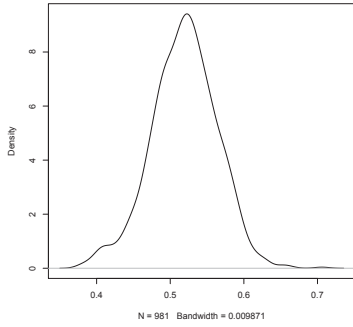

GOYA  
cg16268562

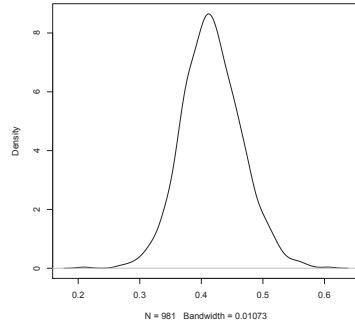

GOYA  
cg00285394

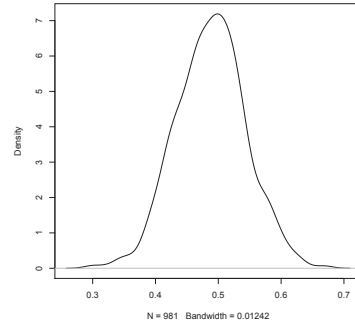

GOYA  
cg27179375

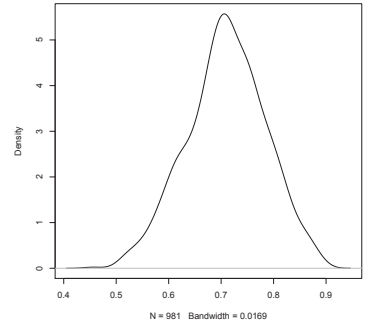

GOYA  
cg05586134

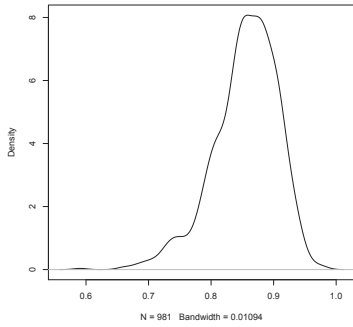

GOYA  
cg07357021

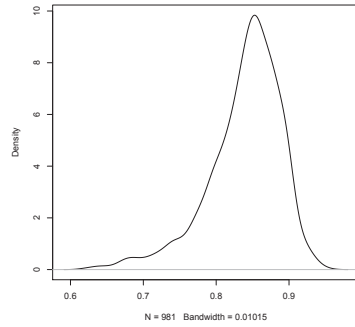

GOYA  
cg21778193

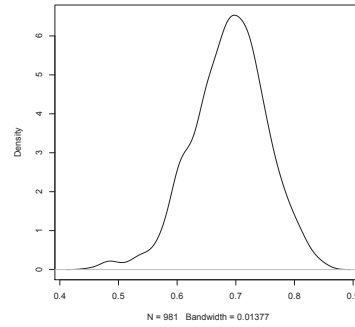

GOYA  
cg04836151

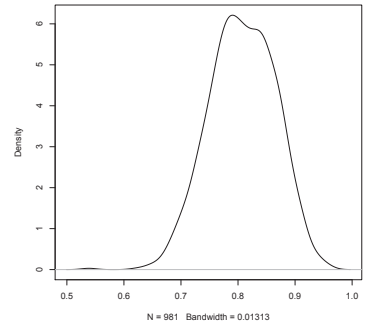

GOYA  
cg9243648

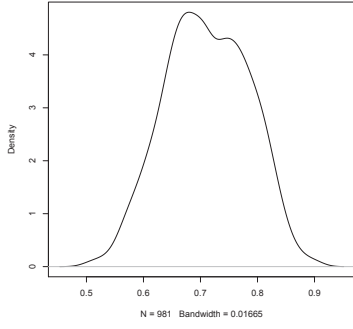

GOYA  
cg07822775

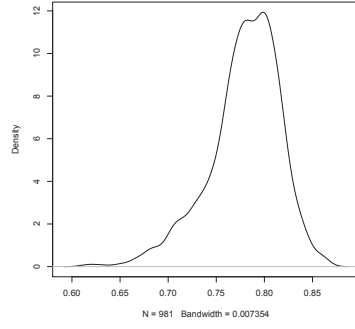

GOYA  
cg14906690

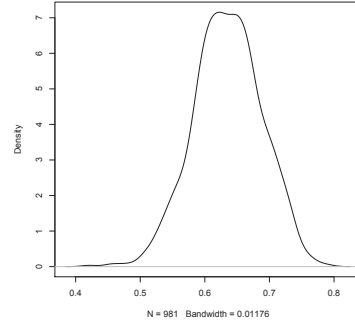

GOYA  
cg05309280

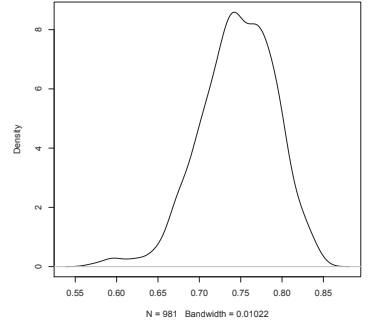

GOYA  
cg10635092

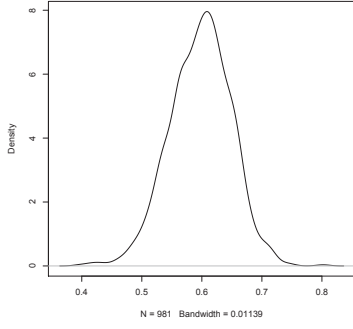

GOYA  
cg13403462

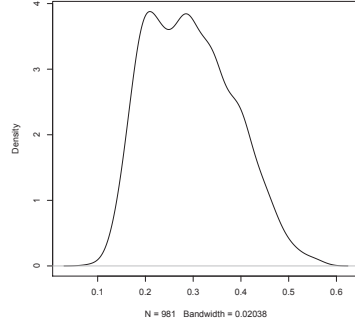

GOYA  
cg10187674

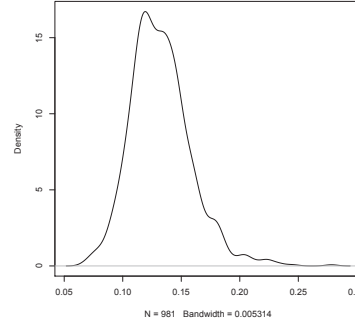

GOYA  
cg19762797

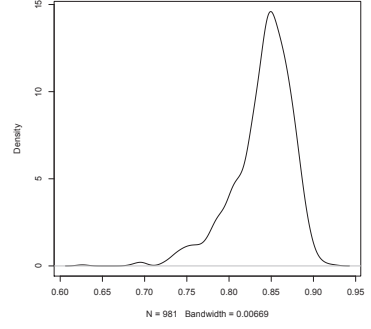

GOYA  
cg09230763

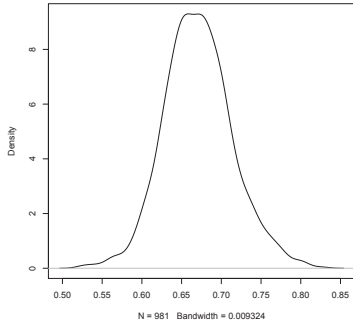

GOYA  
cg18156417

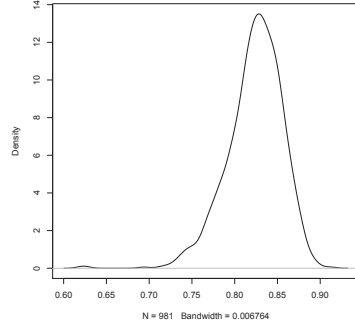

GOYA  
cg26220185

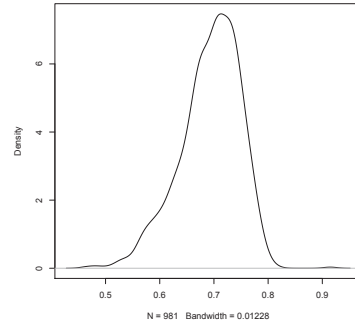

GOYA  
cg13540311

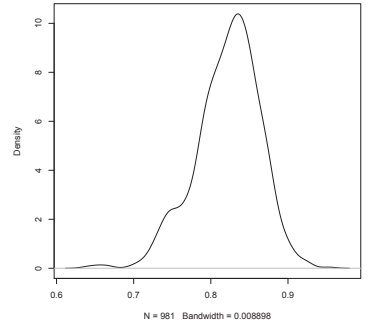

GOYA  
cg16877087

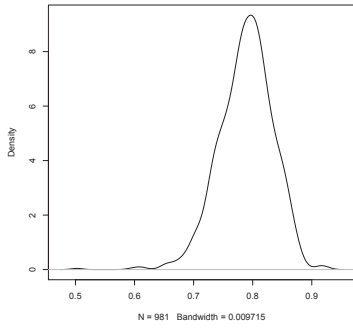

GOYA  
cg20594982

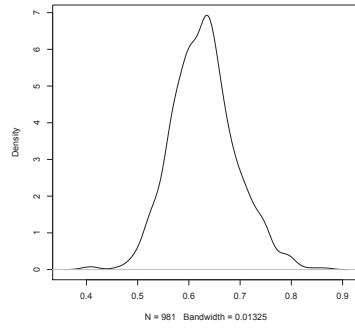

GOYA  
cg14660676

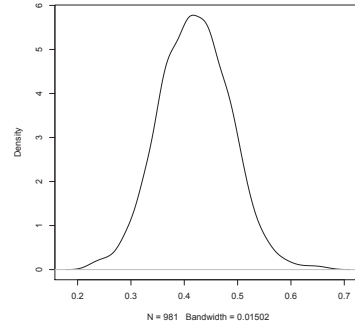

GOYA  
cg09723488

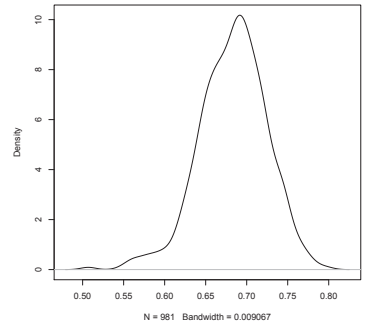

GOYA  
cg13176454

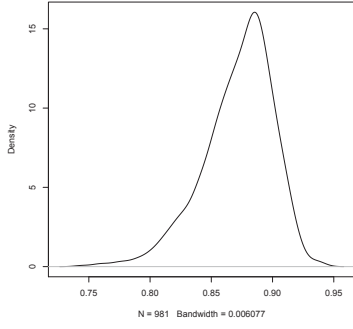

GOYA  
cg14030674

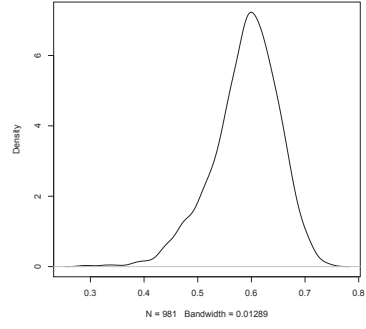

GOYA  
cg27102629

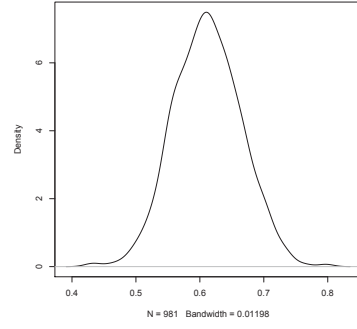

GOYA  
cg06399427

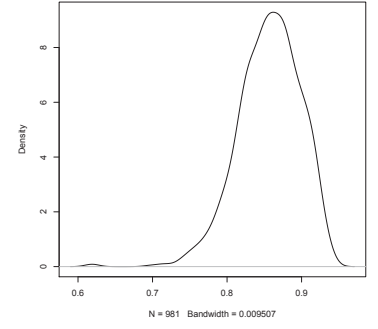

GOYA  
cg01979489

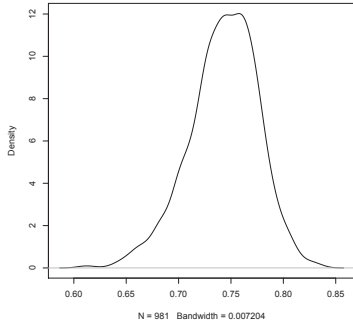

GOYA  
cg05837990

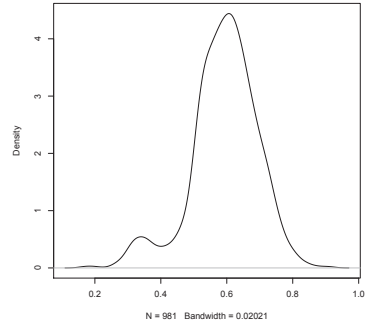

GOYA  
cg21241902

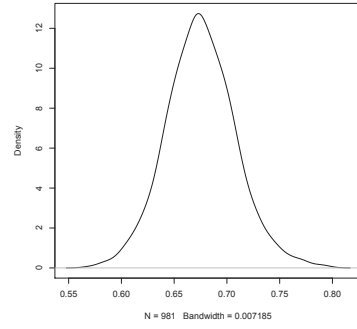

GOYA  
cg00729699

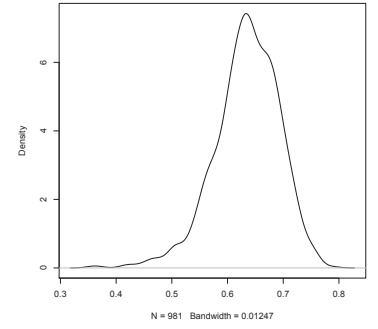

GOYA  
cg03719642

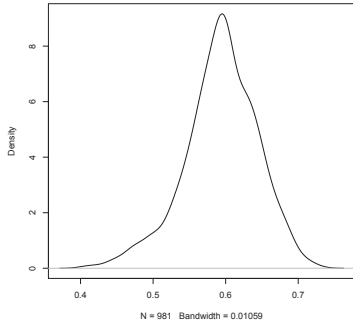

GOYA  
cg18144647

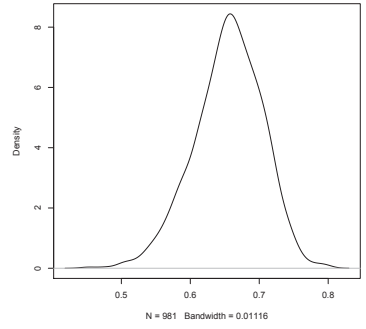

GOYA  
cg21814615

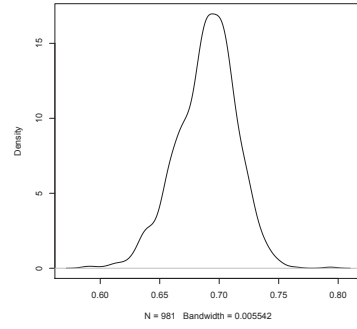

GOYA  
cg14528056

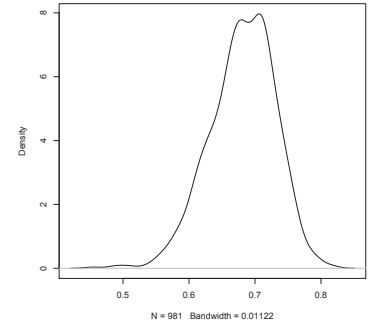

GOYA  
cg22620188

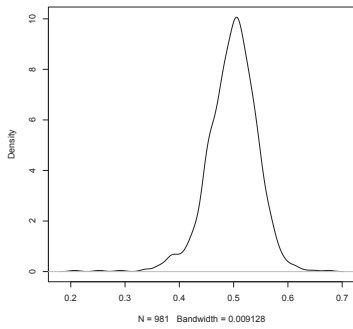

GOYA  
cg06289937

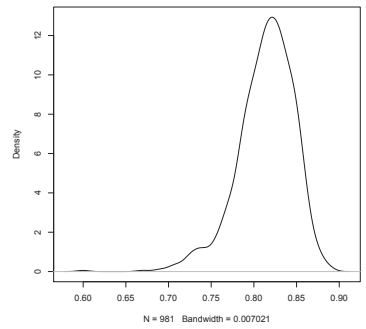

GOYA  
cg21186778

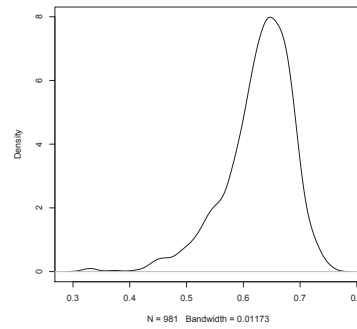

GOYA  
cg17514558

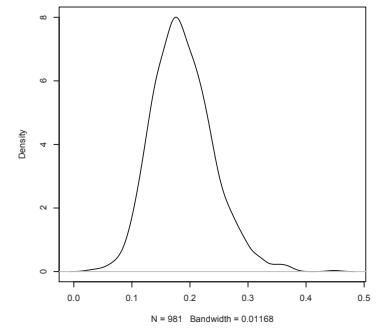



GOYA  
cg15240102

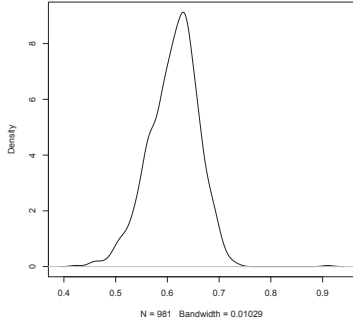

GOYA  
cg21026022

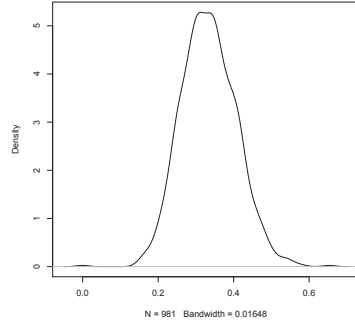

GOYA  
cg18995031

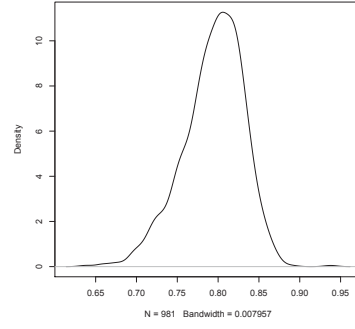

GOYA  
cg04027757

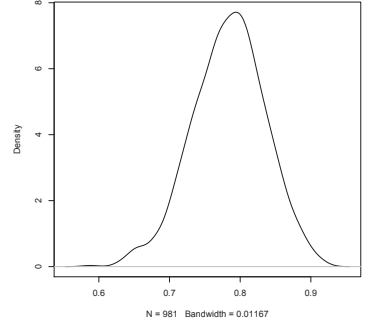

GOYA  
cg01963618

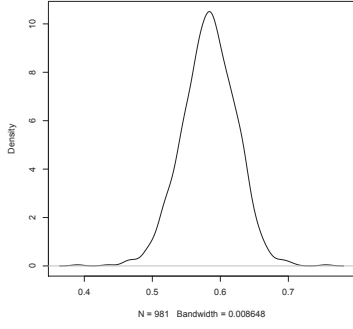

GOYA  
cg21445553

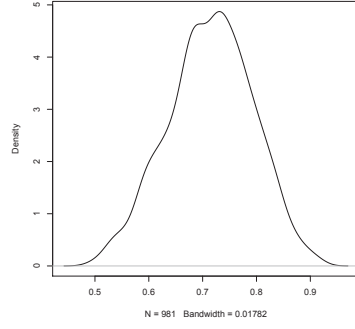

GOYA  
cg05976575

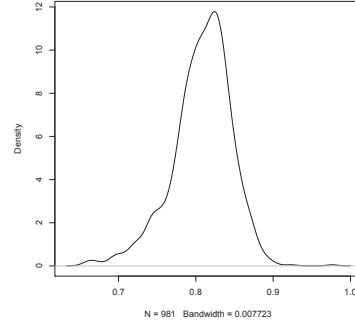

GOYA  
cg13758186

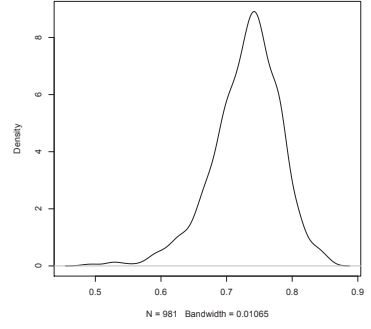

GOYA  
cg20710902

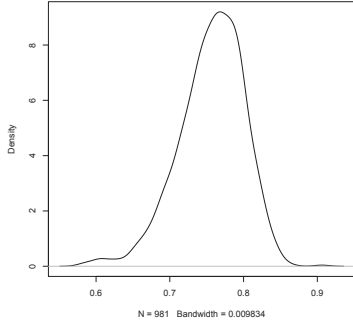

GOYA  
cg03046925

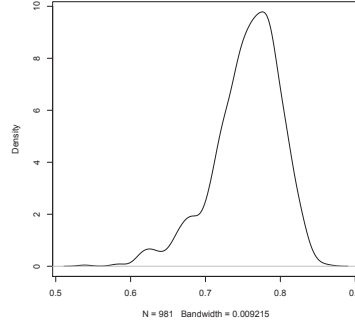

GOYA  
cg15330571

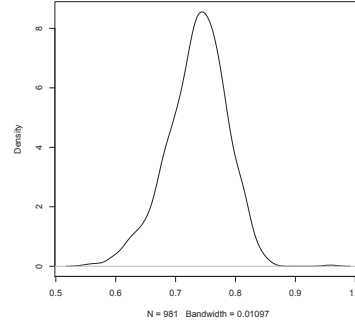

GOYA  
cg11156132

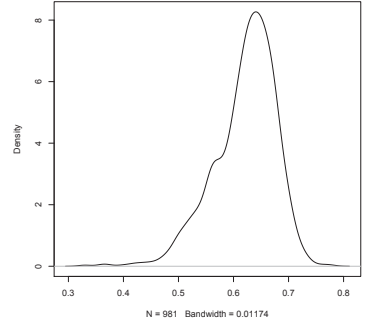

GOYA  
cg18499001

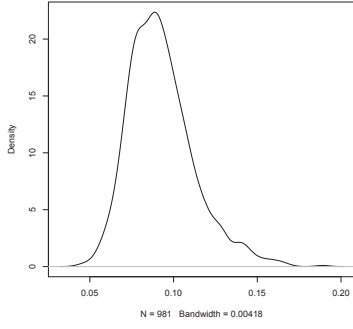

GOYA  
cg05113927

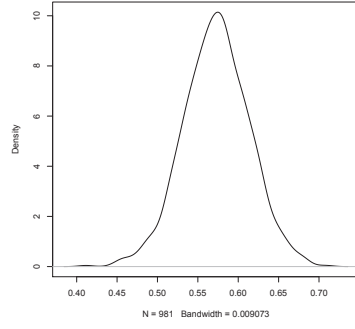

GOYA  
cg22670329

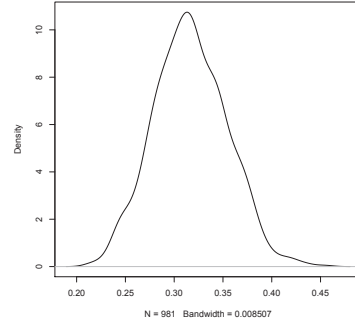

GOYA  
cg15913725

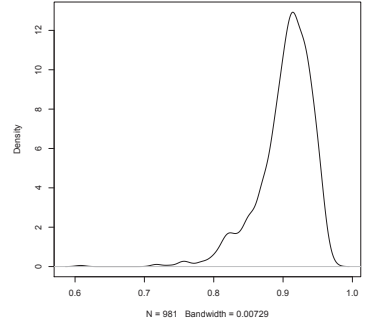

GOYA  
cg01881287

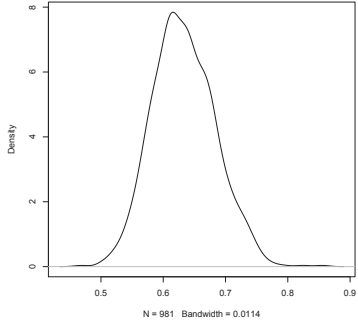

GOYA  
cg05635274

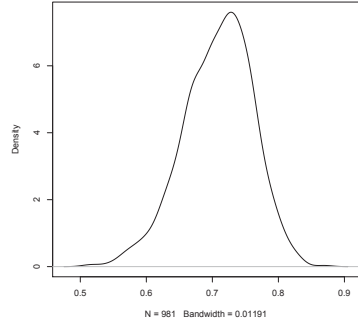

GOYA  
cg03221837

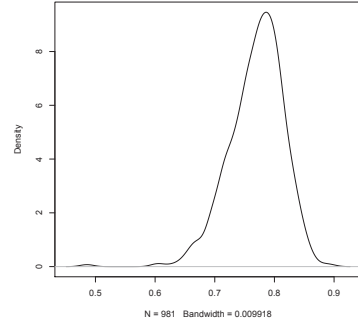

GOYA  
cg13557773

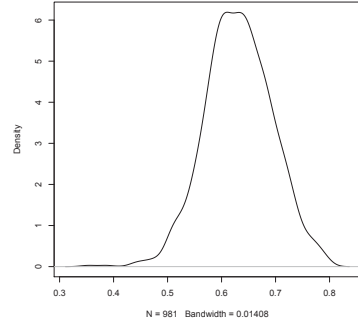

GOYA  
cg14434213

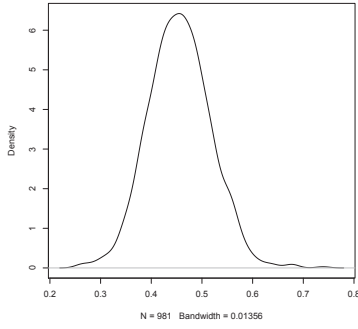

GOYA  
cg05659486

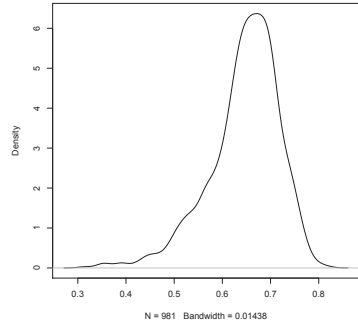

GOYA  
cg22545168

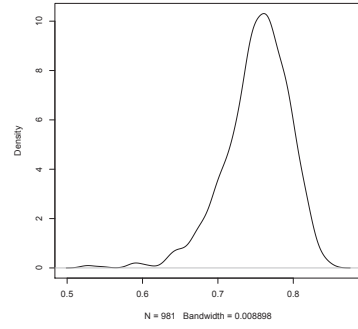

GOYA  
cg15029475

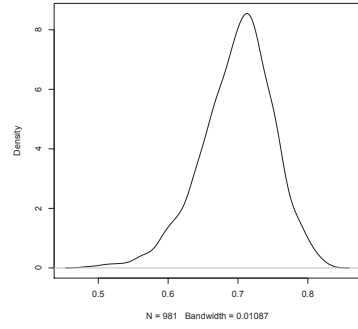

GOYA  
cg23749005

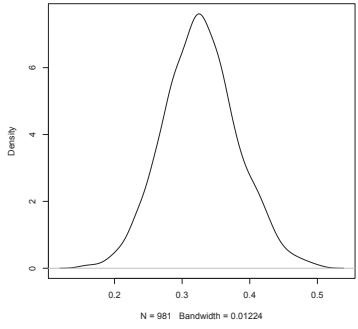

GOYA  
cg23111106

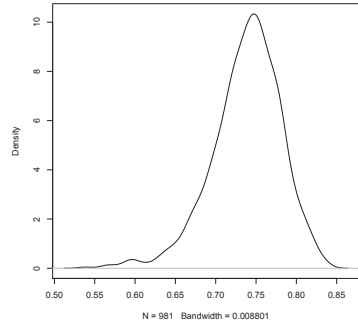

GOYA  
cg21937867

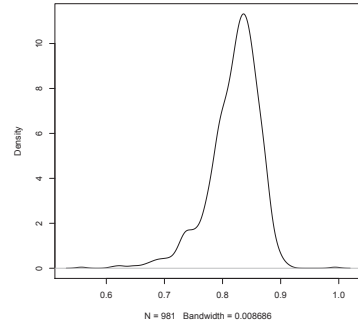

GOYA  
cg04972348

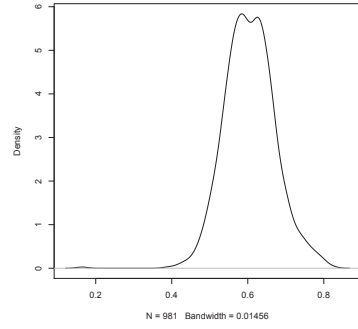

GOYA  
cg05881436

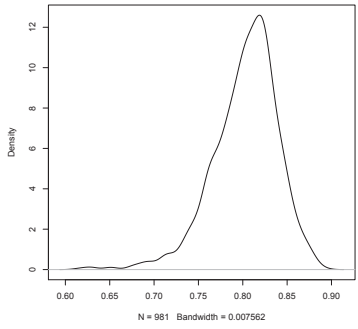

GOYA  
cg23166970

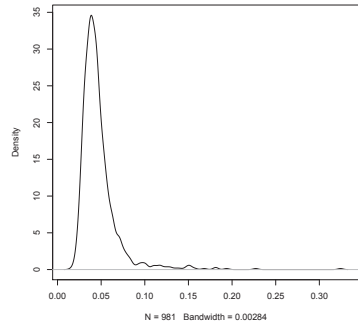

GOYA  
cg06407524

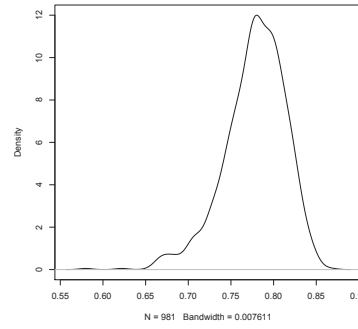

GOYA  
cg01428678

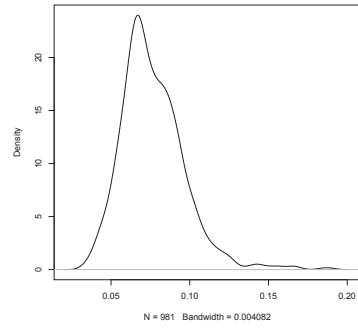

GOYA  
cg26284544

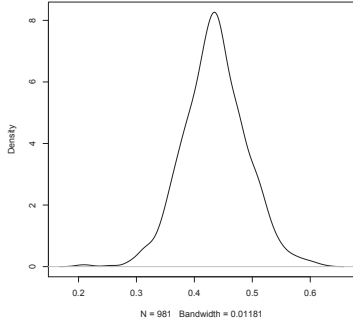

GOYA  
cg12155036

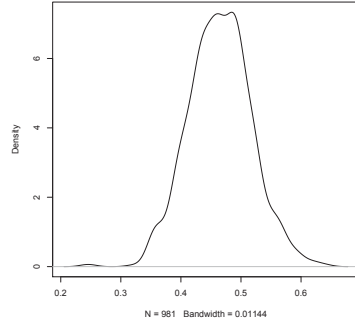

GOYA  
cg25432807

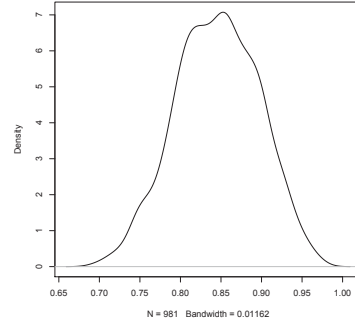

GOYA  
cg25521481

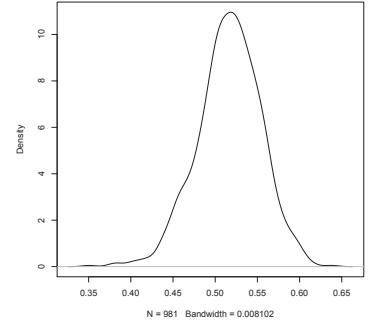

GOYA  
cg25185429

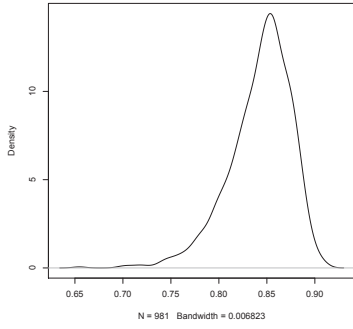

GOYA  
cg01517690

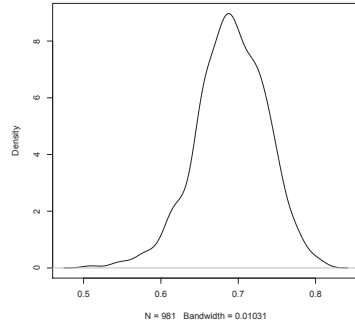

Supplement: file_s3_ddx290.pdf [file file_s3_ddx290.pdf]
